# Supplementary material for: Highly diastereo- and enantioselective Mannich reaction of lactones with N-Boc-aldimines catalyzed by bifunctional rosin-derived amine thiourea catalysts
Source: Royal Society of Chemistry journal article supplement (doi:10.1039/c000621a), 2010-01-01

# Highly Diastereo- and Enantioselective Mannich Reaction of Lactones with N-Boc-Aldimines Catalyzed by Bifunctional Rosin-Derived Amine Thiourea Catalysts

Xianxing Jiang,<sup>a,b</sup> Dan Fu,<sup>a</sup> Gen Zhang,<sup>a</sup> Yiming Cao,<sup>a</sup> Luping Liu,<sup>a</sup> Jingjing Song,<sup>a</sup> and Rui  
Wang<sup>\*a,b</sup>

<sup>a</sup> *State Key Laboratory of Applied Organic Chemistry, Institute of Biochemistry and Molecular Biology, Key Laboratory of Preclinical Study for New Drugs of Gansu Province, Lanzhou University, Lanzhou 730000, China*

<sup>b</sup> *Department of Applied Biology and Chemical Technology, The Hong Kong Polytechnic University, Kowloon, Hong Kong*

E-mail: [wangrui@lzu.edu.cn](mailto:wangrui@lzu.edu.cn) and [bcwang@polyu.edu.hk](mailto:bcwang@polyu.edu.hk)

## Supporting information

|                                                                 |     |
|-----------------------------------------------------------------|-----|
| Contents                                                        | S1  |
| 1.0 General Methods                                             | S2  |
| 2.0 General Procedure and data for synthesis of lactones        | S2  |
| 3.0 General Procedure for catalytic asymmetric Mannich reaction | S3  |
| 4.0 Characterization data                                       | S4  |
| 5.0 References                                                  | S12 |
| 6.0 X-Ray structure of <b>5g</b>                                | S12 |
| 7.0 Copies of HPLC spectra of racemic /chiral products          | S13 |
| 8.0 Copies of NMR spectra of products                           | S31 |

**1.0 General Methods:** All reactions were carried out under an argon atmosphere condition unless otherwise noted and solvents were dried according to established procedures. Reactions were monitored by thin layer chromatography (TLC), column chromatography purifications were carried out using silica gel GF254. Proton nuclear magnetic resonance ( $^1\text{H}$ NMR) spectra were recorded on Bruker 300 MHz spectrometer in  $\text{CDCl}_3$  unless otherwise noted and carbon nuclear magnetic resonance ( $^{13}\text{C}$ NMR) spectra were recorded on Bruker 300 MHz spectrometer in  $\text{CDCl}_3$  using tetramethylsilane (TMS) as internal standard unless otherwise noted. Data are presented as follows: chemical shift, integration, multiplicity (br = broad, s = singlet, d = doublet, t = triplet, q = quartet, m = multiplet, cm = complex multiplet) and coupling constant in Hertz (Hz). Infrared (IR) spectra were recorded on a FT-IR spectrometer. HR-MS was measured with an APEX II 47e mass spectrometer. Melting points were measured on an XT-4 melting point apparatus and were uncorrected. The ee values determination was carried out using chiral high-performance liquid chromatography (HPLC) with Daicel Chiracel AD-H and OJ-H column on Waters with a 2996 UV-detector and the dr values determined by 300 Hz  $^1\text{H}$  NMR and HPLC.

**Abbreviations used:** EtOAc- ethyl acetate, THF- tetrahydrofuran, *i*PrOH- isopropanol,  $\text{CH}_2\text{Cl}_2$ - dichloromethane, LDA- Lithium diisopropylamide.

**Materials:** Dehydroabiatic amine, 3,5-bis(trifluoromethyl)phenyl isothiocyanate,  $\beta$ -ketoesters, LDA and  $\alpha$ -acetyl- $\gamma$ -butyrolactone were commercially available from Acros and Aldrich. Thiourea catalysts were synthesized according to the literature procedures.<sup>1,2</sup>

## 2. General procedure for synthesis of lactones 4b-4d.

To a solution of LDA (25.0 mmol) in THF (30 mL) was added  $\gamma$ -butyrolactone (0.77 mL, 10.0 mmol) at  $-78\text{ }^\circ\text{C}$  under an argon atmosphere and the mixture was stirred for 1 h at the same temperature. Then, benzoyl chloride (1.28 mL, 11.0 mmol) was added over a period of 30 min at  $-78\text{ }^\circ\text{C}$  and stirring was continued for 15 min. The reaction mixture was diluted with 1 N HCl and extracted with ethyl acetate. The combined organic extracts were washed with brine and dried over  $\text{Na}_2\text{SO}_4$ . Evaporation of solvents and purification of the residual crude products by column chromatography on silica gel (hexane/ ethyl acetate=6:1 as eluent) gave  $\alpha$ -benzoyl- $\gamma$ -butyrolactone **4b** in 80% yield: 1.52 g.

**4b: 3-benzoyldihydrofuran-2(3H)-one**

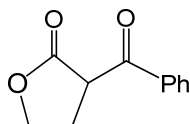

$^1\text{H}$  NMR (300 MHz,  $\text{CDCl}_3$ ):  $\delta$  8.07-8.10(m, 2 H), 7.49-7.66(m, 3 H), 4.39-4.61(m, 3 H), 2.81-2.92(m, 1 H), 2.46-2.58(m, 1 H);  $^{13}\text{C}$  NMR (75 MHz,  $\text{CDCl}_3$ ):  $\delta$  193.1, 172.9, 135.2, 134.1, 129.5, 128.8, 67.8, 48.0, 26.0. ESI-MS:  $m/z$  191 [ $\text{M}^+$ ].

**4c: 3-benzoyltetrahydro-2H-pyran-2-one**

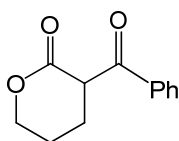

$^1\text{H}$  NMR (300 MHz,  $\text{CDCl}_3$ ):  $\delta$  7.53-7.56(m, 2 H), 7.43-7.46(m, 3 H), 4.37-4.41(m, 2 H), 2.54-2.59(m, 2 H), 1.85-1.88(m, 2 H);  $^{13}\text{C}$  NMR (75 MHz,  $\text{CDCl}_3$ ):  $\delta$  173.2, 134.3, 130.2, 128.2, 94.3, 69.5, 24.4, 23.1. ESI-MS:  $m/z$  205 [ $\text{M}^+$ ].

**4d: 3-propionyltetrahydrofuran-2(3H)-one**

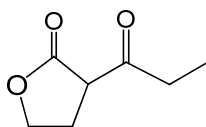

$^1\text{H}$  NMR (300 MHz,  $\text{CDCl}_3$ ):  $\delta$  4.29-4.44(m, 2 H), 3.67-3.73(dd,  $J$  = 6.6 Hz, 9.3 Hz, 1 H), 2.99-3.13(m, 1 H), 2.73-2.85(m, 1 H), 2.38-2.66(m, 1 H), 2.25-2.35(m, 1 H), 1.11(t,  $J$  = 7.2 Hz, 3 H);  $^{13}\text{C}$  NMR (75 MHz,  $\text{CDCl}_3$ ):  $\delta$  203.0, 172.9, 67.6, 52.0, 35.6, 24.0, 7.4. ESI-MS:  $m/z$  143 [ $\text{M}^+$ ].

**3.0 General procedure for the catalytic asymmetric Mannich reaction.**

**Method A:** To a stirred solution of **L2** (0.015 mmol, 15 mol %), *N*-Boc-aldehyde (0.1 mmol) in dry toluene (1.0 mL) under an argon atmosphere, ethyl 2-oxocyclopentanecarboxylate (0.12 mmol) was added over a period of 15 min at -60 °C. The solution was stirred at -60 °C for 12 h. After the reaction was completed (monitored by TLC), the resulting mixture was concentrated under reduced pressure and the residue was purified through column chromatography on silica gel (eluent, ethyl acetate / hexane 1:8) to give the optical pure product. The enantiomeric purity of the product was determined by using HPLC and the dr values determined by  $^1\text{H}$  NMR and HPLC.

**Method B:** To a stirred solution of **L2** (0.015 mmol, 15 mol %), *N*-Boc-aldehyde (0.1 mmol) in dry toluene (1.0 mL) under an argon atmosphere, the lactone (0.12 mmol) was added over a period

of 15 min at -60 °C. The solution was stirred at -60 °C for 12 h. After the reaction was completed (monitored by TLC), the resulting mixture was concentrated under reduced pressure and the residue was purified through column chromatography on silica gel (eluent, ethyl acetate / hexane 1:10), and affording the products were dissolved in diethyl ether. After filtration and the solvent was removed at reduced pressure to give the pure products. The enantiomeric purity of the product was determined by using HPLC and the dr values determined by <sup>1</sup>H NMR and HPLC.

#### 4.0 Characterization data

**3a: (S)-ethyl 1-((S)-(tert-butoxycarbonylamino)(phenyl)methyl)-2-oxocyclopentane carboxylate**

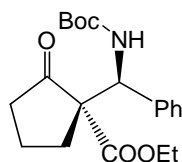

White solid, mp 109 °C. <sup>1</sup>H NMR (300 MHz, CDCl<sub>3</sub>): δ 7.25-7.32(m, 5 H), 5.92(br, 1 H), 5.21(d, *J* = 9.6 Hz, 1 H), 4.11-4.20(m, 2 H), 2.48-2.57(m, 1 H), 2.32-2.40(m, 2 H), 1.83-2.05(m, 3 H), 1.39(s, 9 H), 1.19(t, *J* = 7.2 Hz, 3 H); <sup>13</sup>C NMR (75 MHz, CDCl<sub>3</sub>): δ 211.2, 155.2, 138.5, 128.3, 128.2, 127.7, 79.7, 64.9, 61.8, 55.8, 37.6, 30.6, 28.3, 18.9, 13.9. IR: 3363, 2977, 2932, 1751, 1721, 1700, 1497, 1366, 1230, 1168, 1024, 706 cm<sup>-1</sup>. HRMS-ESI (*m/z*): calcd for C<sub>20</sub>H<sub>27</sub>NO<sub>5</sub> +NH<sub>4</sub><sup>+</sup>: 379.2227; found: 379.2231, 1.1ppm.

Major diastereomer: ee was determined by HPLC analysis (Chiralcel AD-H, *i*-PrOH/ Hexane = 2/98, 0.8 mL/min, 212 nm.) Retention time: *t*<sub>major</sub> =31.01 min, *t*<sub>minor</sub> =77.09 min, ee=99 %.

**3b: (S)-ethyl 1-((S)-(tert-butoxycarbonylamino)(naphthalen-1-yl)methyl)-2-oxocyclopentane carboxylate**

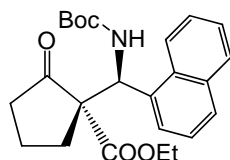

White solid, mp 136 °C. <sup>1</sup>H NMR (300 MHz, CDCl<sub>3</sub>): δ 8.28(d, *J* = 8.4 Hz, 1 H), 7.85(d, *J* = 7.8 Hz, 1 H), 7.79(d, *J* = 10.5 Hz, 1 H), 7.63(d, *J* = 7.2 Hz, 1 H), 7.37-7.58(m, 3 H), 6.02(d, *J* = 10.2 Hz, 1 H), 5.85(d, *J* = 9.9 Hz, 1 H), 4.03-4.11(dd, *J* = 7.2 Hz, 14.1 Hz, 2 H), 2.34-2.79(m, 3 H), 1.91-2.21(m, 3 H), 1.41(s, 9 H), 1.03(t, *J* = 6.9 Hz, 3 H); <sup>13</sup>C NMR (75 MHz, CDCl<sub>3</sub>): δ 211.9, 155.6, 135.0, 133.9, 128.8, 128.6, 126.6, 125.7, 125.6, 125.0, 123.6, 79.8, 64.7, 61.6, 50.5, 37.8,

33.1, 28.3, 19.1, 13.7. IR: 3421, 2976, 2932, 1750, 1714, 1567, 1493, 1368, 1230, 1166, 1025, 782  $\text{cm}^{-1}$ . HRMS-ESI ( $m/z$ ): calcd for  $\text{C}_{24}\text{H}_{29}\text{NO}_5 + \text{NH}_4^+$ : 429.2384; found: 429.2391, 1.6ppm.

Major diastereomer: ee was determined by HPLC analysis (Chiralcel AD-H, *i*-PrOH/ Hexane = 2/98, 1.0 mL/min, 222 nm.) Retention time:  $t_{\text{major}} = 14.87$  min,  $t_{\text{minor}} = 27.94$  min, ee=97 %.

**3c: (S)-ethyl 1-((R)-(tert-butoxycarbonylamino)(2-fluorophenyl)methyl)-2-oxocyclopentane carboxylate**

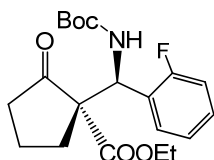

Colorless needs, mp 120-121 °C.  $^1\text{H}$  NMR (300 MHz,  $\text{CDCl}_3$ ):  $\delta$  7.49(dt,  $J = 1.8$  Hz, 7.8 Hz, 1 H), 7.22-7.29(m, 1 H), 6.99-7.12(m, 2 H), 6.22(d,  $J = 9.6$  Hz, 1 H), 5.56(d,  $J = 9.9$  Hz, 1 H), 4.08-4.19(m, 2 H), 2.29-2.55(m, 3 H), 1.96-2.12(m, 3 H), 1.39(s, 9 H), 1.19(t,  $J = 6.9$  Hz, 3 H);  $^{13}\text{C}$  NMR (75 MHz,  $\text{CDCl}_3$ ):  $\delta$  210.8, 169.4, 162.1, 158.8, 155.2, 130.2, 130.1, 129.5, 129.4, 124.4, 124.3, 115.6, 115.3, 79.8, 64.8, 61.8, 49.2, 37.2, 30.6, 28.2, 18.8, 13.9. IR: 3441, 2977, 2933, 1753, 1717, 1493, 1459, 1367, 1231, 1168, 1023, 762  $\text{cm}^{-1}$ . HRMS-ESI ( $m/z$ ): calcd for  $\text{C}_{20}\text{H}_{26}\text{FNO}_5 + \text{NH}_4^+$ : 397.2133; found: 397.2142, 2.3ppm.

Major diastereomer: ee was determined by HPLC analysis (Chiralcel AD-H, *i*-PrOH/ Hexane = 2/98, 1.0 mL/min, 210 nm.) Retention time:  $t_{\text{major}} = 15.24$  min,  $t_{\text{minor}} = 19.73$  min, ee=92 %.

**3d: (S)-ethyl 1-((S)-(tert-butoxycarbonylamino)(3-methoxyphenyl)methyl)-2-oxocyclopentane carboxylate**

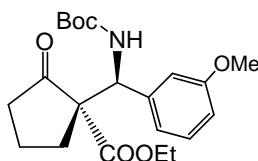

Colorless solid, mp 128-129 °C.  $^1\text{H}$  NMR (300 MHz,  $\text{CDCl}_3$ ):  $\delta$  7.24(t,  $J = 8.1$  Hz, 1 H), 6.88(m, 2 H), 6.78-6.81(m, 1 H), 5.85(br, 1 H), 5.22(d,  $J = 9.6$  Hz, 1 H), 4.09-4.17(m, 2 H), 3.78(s, 3 H), 2.47-2.56(m, 1 H), 2.29-2.32(m, 2 H), 1.91-2.05(m, 3 H), 1.39(s, 9 H), 1.20(t,  $J = 7.2$  Hz, 3 H);  $^{13}\text{C}$  NMR (75 MHz,  $\text{CDCl}_3$ ):  $\delta$  211.1, 159.5, 155.2, 129.3, 120.5, 113.9, 113.2, 79.8, 64.9, 61.9, 55.2, 37.7, 28.3, 18.9, 13.9. IR: 3363, 2975, 2929, 1751, 1720, 1700, 1494, 1385, 1231, 1167, 1044, 782  $\text{cm}^{-1}$ . HRMS-ESI ( $m/z$ ): calcd for  $\text{C}_{21}\text{H}_{29}\text{NO}_6 + \text{NH}_4^+$ : 409.2333; found: 409.2325, 2.0ppm.

Major diastereomer: ee was determined by HPLC analysis (Chiralcel AD-H, *i*-PrOH/ Hexane = 2/98, 1.0 mL/min, 215 nm.) Retention time:  $t_{\text{major}}=39.37$  min,  $t_{\text{minor}}=101.46$  min, ee=96 %.

**5a: tert-butyl (S)-((R)-3-acetyl-2-oxotetrahydrofuran-3-yl)(phenyl)methylcarbamate**

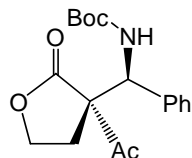

Colorless needs, mp 116-117 °C.  $^1\text{H}$  NMR (300 MHz):  $\delta$  7.34(m, 5 H), 5.79(d,  $J=8.7$  Hz, 1 H), 5.01(d,  $J=9.9$  Hz, 1 H), 3.99(dd,  $J=7.8$  Hz, 16.5 Hz, 1 H), 3.59(m, 1 H), 2.90 (m, 1 H), 2.49(s, 3 H), 2.03-2.13(m, 1 H), 1.39(s, 9 H);  $^{13}\text{C}$  NMR (75 MHz):  $\delta$  173.2, 154.6, 128.8, 128.4, 127.2, 80.8, 66.9, 66.1, 56.3, 28.2, 28.1, 25.4. IR: 3341, 2977, 2926, 1761, 1716, 1522, 1456, 1368, 1246, 1165, 1025, 704  $\text{cm}^{-1}$ . HRMS-ESI ( $m/z$ ): calcd for  $\text{C}_{18}\text{H}_{23}\text{NO}_5 + \text{NH}_4^+$ : 351.1914; found: 351.1918, 1.1ppm.

Major diastereomer: ee was determined by HPLC analysis (Chiralcel AD-H, *i*-PrOH/ Hexane = 20/80, 1.0 mL/min, 215 nm.) Retention time:  $t_{\text{major}}=6.65$  min,  $t_{\text{minor}}=15.82$  min, ee=91 %.

**5b: tert-butyl (S)-((R)-3-acetyl-2-oxotetrahydrofuran-3-yl)(p-tolyl)methylcarbamate**

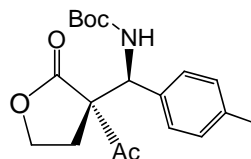

Colorless needs, mp 149 °C.  $^1\text{H}$  NMR (300 MHz):  $\delta$  7.14-7.27(m, 4 H), 5.77(d,  $J=9.3$  Hz, 1 H), 4.95(d,  $J=6.9$  Hz, 1 H), 3.96(dd,  $J=8.1$  Hz, 16.2 Hz, 1 H), 3.60-3.62(m, 1 H), 2.85-2.93(m, 1 H), 2.48(s, 3 H), 2.33(s, 3 H), 2.04-2.14(m, 1 H), 1.39(s, 9 H);  $^{13}\text{C}$  NMR (75 MHz):  $\delta$  173.2, 154.5, 138.2, 144.0, 129.5, 127.1, 80.7, 66.9, 66.1, 56.2, 28.2, 25.4, 24.3, 20.9. IR: 3342, 2979, 2926, 1761, 1715, 1515, 1455, 1368, 1246, 1164, 1025, 733  $\text{cm}^{-1}$ . HRMS-ESI ( $m/z$ ): calcd for  $\text{C}_{19}\text{H}_{25}\text{NO}_5 + \text{NH}_4^+$ : 365.2071; found: 365.2080, 2.5ppm.

Major diastereomer: ee was determined by HPLC analysis (Chiralcel AD-H, *i*-PrOH/ Hexane = 10/90, 0.8 mL/min, 215 nm.) Retention time:  $t_{\text{major}}=16.05$  min,  $t_{\text{minor}}=24.60$  min, ee=99 %.

**5c: tert-butyl (S)-((R)-3-acetyl-2-oxotetrahydrofuran-3-yl)(o-tolyl)methylcarbamate**

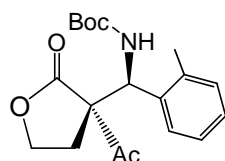

Colorless needs, mp 126.  $^1\text{H}$  NMR (300 MHz):  $\delta$  7.56(s, 1 H), 7.19-7.26(m, 3 H), 5.79(d,  $J=9.9$

Hz, 1 H), 5.06(d,  $J=9.0$  Hz, 1 H), 4.01-4.09(m, 2 H), 2.91-2.95(m, 1 H), 2.55-2.62(m, 1 H), 2.49(s, 3 H), 2.23(s, 3 H), 1.38(s, 9 H);  $^{13}\text{C}$  NMR (75 MHz):  $\delta$  173.8, 136.9, 136.1, 131.4, 128.4, 127.5, 126.3, 80.6, 66.9, 65.9, 51.9, 29.7, 28.2, 26.3, 20.0. IR: 3402, 2976, 2926, 1759, 1714, 1505, 1458, 1368, 1244, 1164, 1029, 754  $\text{cm}^{-1}$ . HRMS-ESI ( $m/z$ ): calcd for  $\text{C}_{19}\text{H}_{25}\text{NO}_5+\text{NH}_4^+$ : 365.2071; found: 365.2076, 1.4ppm.

Major diastereomer: ee was determined by HPLC analysis (Chiralcel AD-H, *i*-PrOH/ Hexane = 10/90, 1.0 mL/min, 212 nm.) Retention time:  $t_{\text{major}}=11.24$  min,  $t_{\text{minor}}=23.72$  min, ee=93 %.

**5d: *tert*-butyl (S)-((R)-3-acetyl-2-oxotetrahydrofuran-3-yl)(2-methoxyphenyl)methylcarbamate**

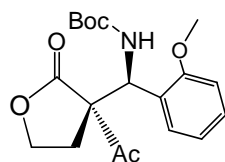

Colorless solid, mp 180-181 °C.  $^1\text{H}$  NMR (300 MHz):  $\delta$  7.30-7.40(m, 2 H), 6.96(dd,  $J=7.5$  Hz, 15.9 Hz, 2 H), 5.89-5.96(m, 2 H), 3.94-3.97(m, 1 H), 3.87(s, 3 H), 3.82-3.84(m, 1 H), 2.86-2.94(m, 1 H), 2.45(s, 3 H), 2.14-2.34(m, 1 H), 1.39(s, 9 H);  $^{13}\text{C}$  NMR (75 MHz):  $\delta$  173.5, 157.3, 135.9, 131.4, 129.8, 124.4, 121.4, 111.4, 80.2, 67.2, 66.3, 55.9, 55.4, 28.3, 26.1, 25.9. IR: 3354, 2979, 2927, 2855, 1760, 1713, 1495, 1370, 1246, 1164, 1028, 735  $\text{cm}^{-1}$ . HRMS-ESI ( $m/z$ ): calcd for  $\text{C}_{19}\text{H}_{25}\text{NO}_6+\text{NH}_4^+$ : 381.2020; found: 381.2012, 2.1ppm.

Major diastereomer: ee was determined by HPLC analysis (Chiralcel AD-H, *i*-PrOH/ Hexane = 10/90, 1.0 mL/min, 224 nm.) Retention time:  $t_{\text{major}}=16.10$  min,  $t_{\text{minor}}=24.84$  min, ee=88 %.

**5e: *tert*-butyl (S)-((R)-3-acetyl-2-oxotetrahydrofuran-3-yl)(3-methoxyphenyl)methylcarbamate**

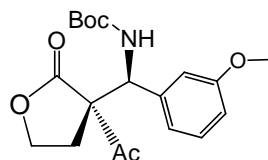

Colorless needs, mp 159 °C.  $^1\text{H}$  NMR (300 MHz):  $\delta$  7.24-7.29(m, 1 H), 6.84-6.89(m, 3 H), 5.80(d,  $J=9.6$  Hz, 1 H), 4.97(d,  $J=6.9$  Hz, 1 H), 4.03(dd,  $J=8.1$  Hz, 16.2 Hz, 1 H), 3.79(s, 3 H), 3.64-3.67(m, 1 H), 2.88(m, 1 H), 2.49(s, 3 H), 2.04-2.13(m, 1 H), 1.39(s, 9H);  $^{13}\text{C}$  NMR (75 MHz):  $\delta$  200.8, 173.2, 159.9, 154.6, 138.6, 129.9, 119.2, 113.9, 112.9, 80.8, 66.9, 66.2, 56.2, 55.3, 28.2, 25.4, 24.3. IR: 3346, 2978, 2931, 1761, 1716, 1518, 1493, 1368, 1248, 1164, 1026, 782  $\text{cm}^{-1}$ .

HRMS-ESI ( $m/z$ ): calcd for  $C_{19}H_{25}NO_6+NH_4^+$ : 381.2020; found: 381.2025, 1.3ppm.

Major diastereomer: ee was determined by HPLC analysis (Chiralcel AD-H, *i*-PrOH/ Hexane = 10/90, 0.8 mL/min, 215 nm.) Retention time:  $t_{major}$  =24.18 min, ee=99 %.

**5f: tert-butyl (S)-((R)-3-acetyl-2-oxotetrahydrofuran-3-yl)(m-tolyl)methylcarbamate**

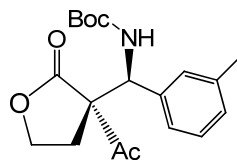

Colorless solid, mp 139-140 °C.  $^1H$  NMR (300 MHz):  $\delta$  7.11-7.27(m, 4 H), 5.79(d,  $J$ =9.6 Hz, 1 H), 4.99(br, 1 H), 3.99(dd,  $J$ =8.1 Hz, 16.2 Hz, 1 H), 3.60-3.61(m, 1 H), 2.89(m, 1 H), 2.49(s, 3 H), 2.34(s, 3 H), 2.07-2.11(m, 1 H), 1.39(s, 9 H);  $^{13}C$  NMR (75 MHz):  $\delta$  173.2, 154.6, 138.6, 129.2, 128.7, 128.0, 124.1, 80.7, 66.9, 66.1, 56.3, 28.2, 25.4, 24.2, 21.5. IR: 3350, 2923, 2853, 1757, 1714, 1518, 1456, 1369, 1245, 1163, 1027, 732  $cm^{-1}$ . HRMS-ESI ( $m/z$ ): calcd for  $C_{19}H_{25}NO_5+NH_4^+$ : 365.2071; found: 365.2065, 1.6ppm.

Major diastereomer: ee was determined by HPLC analysis (Chiralcel AD-H, *i*-PrOH/ Hexane = 10/90, 1.0 mL/min, 224 nm.) Retention time:  $t_{major}$  =9.74 min,  $t_{minor}$  =27.86 min, ee=82 %.

**5g: tert-butyl (R)-((R)-3-acetyl-2-oxotetrahydrofuran-3-yl)(2-bromophenyl)methylcarbamate**

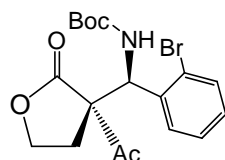

Colorless solid, mp 169 °C.  $^1H$  NMR (300 MHz):  $\delta$  7.57-7.60(d,  $J$ =8.1 Hz, 1 H), 7.43-7.46(d,  $J$ =7.8 Hz, 1H), 7.32-7.37(t,  $J$ =7.2 Hz, 1H), 7.17-7.22(m, 1H), 7.03(d,  $J$ =9.9 Hz, 1 H), 6.08(d,  $J$ =9.9 Hz, 1 H), 3.95-4.02(m, 2 H), 2.49(s, 3 H), 2.39-2.44(m, 1 H), 2.13-2.26(m, 1 H), 1.38(s, 9 H);  $^{13}C$  NMR (75 MHz):  $\delta$  203.5, 175.6, 136.9, 132.9, 130.1, 129.0, 128.8, 125.5, 80.4, 65.7, 65.1, 54.2, 29.7, 28.2, 25.3. IR: 3409, 2978, 2926, 1766, 1712, 1590, 1494, 1366, 1221, 1167, 1029, 758  $cm^{-1}$ . HRMS-ESI ( $m/z$ ): calcd for  $C_{18}H_{22}BrNO_5+NH_4^+$ : 429.1020; found: 429.1028, 1.9ppm.

Major diastereomer: ee was determined by HPLC analysis (Chiralcel AD-H, *i*-PrOH/ Hexane = 10/90, 0.8 mL/min, 215 nm.) Retention time:  $t_{minor}$  =15.06 min,  $t_{major}$  =17.78 min, ee=98 %.

**5h: tert-butyl (R)-((R)-3-acetyl-2-oxotetrahydrofuran-3-yl)(2-fluorophenyl)methylcarbamate**



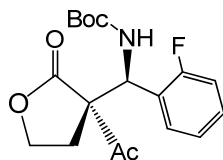

Colorless solid, mp 127-128 °C.  $^1\text{H}$  NMR (300 MHz):  $\delta$  7.47-7.49(m, 1 H), 7.31-7.34(m, 1 H), 7.04-7.17(m, 2 H), 5.95(d,  $J=10.5$  Hz, 1 H), 5.35(d,  $J=8.4$  Hz, 1 H), 3.96-4.03(m, 2 H), 2.95-3.02(m, 1 H), 2.44(s, 3 H), 2.19-2.28(m, 1 H), 1.39(s, 9 H);  $^{13}\text{C}$  NMR (75 MHz):  $\delta$  172.9, 159.3, 154.8, 131.7, 130.5, 130.4, 124.9, 123.8, 116.5, 116.1, 80.7, 67.2, 66.5, 54.6, 28.2, 28.1, 25.7, 25.5. IR: 3365, 2979, 2929, 1767, 1716, 1493, 1457, 1368, 1246, 1164, 1023, 763  $\text{cm}^{-1}$ . HRMS-ESI ( $m/z$ ): calcd for  $\text{C}_{18}\text{H}_{22}\text{FNO}_5 + \text{NH}_4^+$ : 369.1820; found: 369.1823, 0.8ppm.

Major diastereomer: ee was determined by HPLC analysis (Chiralcel AD-H, *i*-PrOH/ Hexane = 10/90, 0.8 mL/min, 215 nm.) Retention time:  $t_{\text{major}}=12.68$  min,  $t_{\text{minor}}=23.46$  min, ee=81 %.

**5i: tert-butyl (S)-((R)-3-acetyl-2-oxotetrahydrofuran-3-yl)(4-chlorophenyl)methylcarbamate**

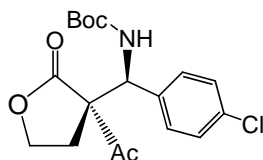

White solid, mp 144-145 °C.  $^1\text{H}$  NMR (300 MHz):  $\delta$  7.27-7.36(m, 4 H), 5.77(d,  $J=8.1$  Hz, 1 H), 4.94(br, 1 H), 4.03(dd,  $J=8.4$  Hz, 16.8 Hz, 1 H), 3.74-3.78(m, 1 H), 2.86-2.92(m, 1 H), 2.46(s, 3 H), 1.99-2.09(m, 1 H), 1.39(s, 9 H);  $^{13}\text{C}$  NMR (75 MHz):  $\delta$  173.1, 154.6, 135.7, 134.5, 129.1, 128.8, 81.2, 66.9, 66.4, 55.9, 28.3, 25.5, 24.5. IR: 3340, 2980, 2928, 1761, 1716, 1519, 1494, 1369, 1246, 1164, 1019, 733  $\text{cm}^{-1}$ . HRMS-ESI ( $m/z$ ): calcd for  $\text{C}_{18}\text{H}_{22}\text{ClNO}_5 + \text{NH}_4^+$ : 385.1525; found: 385.1518, 1.8ppm.

Major diastereomer: ee was determined by HPLC analysis (Chiralcel OJ-H, *i*-PrOH/ Hexane = 10/90, 1.0 mL/min, 224 nm.) Retention time:  $t_{\text{minor}}=11.24$  min,  $t_{\text{major}}=15.46$  min, ee=75 %.

**5j: tert-butyl (R)-((R)-3-acetyl-2-oxotetrahydrofuran-3-yl)(thiophen-2-yl)methylcarbamate**

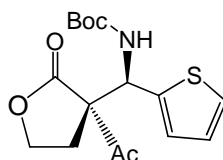

Colorless solid, mp 174-175 °C.  $^1\text{H}$  NMR (300 MHz):  $\delta$  7.17-7.19(m, 1 H), 6.90-6.97(m, 2 H), 6.01(d,  $J=9.3$  Hz, 1 H), 4.82(d,  $J=9.3$  Hz, 1 H), 3.86-4.03(m, 2 H), 2.79-2.82(m, 1 H), 2.39(s, 3 H), 2.08-2.18(m, 1 H), 1.35(s, 9 H);  $^{13}\text{C}$  NMR (75 MHz):  $\delta$  173.0, 154.5, 127.6, 126.8, 126.2, 125.3, 81.1, 67.5, 66.4, 53.1, 29.7, 28.2, 25.4. IR: 3306, 2922, 2852, 1749, 1715, 1682, 1526, 1367, 1248,

1162, 1024, 732  $\text{cm}^{-1}$ . HRMS-ESI ( $m/z$ ): calcd for  $\text{C}_{16}\text{H}_{21}\text{NO}_5\text{S}+\text{NH}_4^+$ : 357.1479; found: 357.1471, 2.2ppm.

Major diastereomer: ee was determined by HPLC analysis (Chiralcel OJ-H, *i*-PrOH/ Hexane = 10/90, 1.0 mL/min, 236 nm.) Retention time:  $t_{\text{major}}=13.39$  min,  $t_{\text{minor}}=14.72$  min, ee=93 %.

**5k: tert-butyl (S)-((R)-3-acetyl-2-oxotetrahydrofuran-3-yl)(furan-3-yl)methylcarbamate**

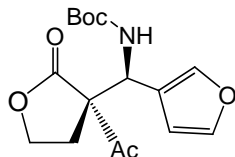

White solid, mp 130 °C.  $^1\text{H}$  NMR (300 MHz):  $\delta$  7.39(d,  $J=1.8$  Hz, 2 H), 6.35(s, 1 H), 5.75(d,  $J=9.3$  Hz, 1 H), 4.69(br, 1 H), 4.08(dd,  $J=5.4$  Hz, 9.3 Hz, 2 H), 2.81-2.89(m, 1 H), 2.43(s, 3 H), 2.11-2.21 (m, 1 H), 1.42(s, 9 H);  $^{13}\text{C}$  NMR (75 MHz):  $\delta$  173.4, 154.7, 143.9, 140.6, 109.4, 80.9, 66.9, 66.4, 49.9, 28.2, 25.6, 25.0. IR: 3412, 3005, 2924, 2854, 1745, 1714, 1524, 1423, 1363, 1223, 1165, 531  $\text{cm}^{-1}$ . HRMS-ESI ( $m/z$ ): calcd for  $\text{C}_{16}\text{H}_{21}\text{NO}_6+\text{NH}_4^+$ : 341.1707; found: 341.1713, 1.8ppm.

Major diastereomer: ee was determined by HPLC analysis (Chiralcel OJ-H, *i*-PrOH/ Hexane = 10/90, 1.0 mL/min, 212 nm.) Retention time:  $t_{\text{minor}}=14.24$  min,  $t_{\text{major}}=20.24$  min, ee=87 %.

**6a: tert-butyl (S)-((R)-3-benzoyl-2-oxotetrahydrofuran-3-yl)(phenyl)methylcarbamate**

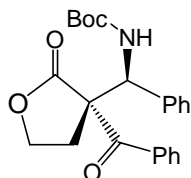

White solid, mp 152 °C.  $^1\text{H}$  NMR (300 MHz,  $\text{CDCl}_3$ ):  $\delta$  7.86(d,  $J = 7.2$  Hz, 2 H), 7.48-7.62(m, 3 H), 7.35-7.37(m, 5 H), 6.65(d,  $J = 9.0$  Hz, 1 H), 5.64(d,  $J = 9.3$  Hz, 1 H), 4.14(dd,  $J = 8.4$  Hz, 15.9 Hz, 1 H), 3.51-3.58(m, 1 H), 2.76-2.85(m, 1 H), 2.49-2.58(m, 1 H), 1.29(s, 9 H);  $^{13}\text{C}$  NMR (75 MHz,  $\text{CDCl}_3$ ):  $\delta$  196.9, 176.1, 154.3, 137.2, 134.9, 133.2, 128.9, 128.8, 128.6, 128.3, 79.7, 65.6, 63.1, 57.3, 31.0, 28.1. IR: 3419, 2978, 2925, 1764, 1715, 1674, 1496, 1369, 1246, 1169, 1031, 701  $\text{cm}^{-1}$ . HRMS-ESI ( $m/z$ ): calcd for  $\text{C}_{23}\text{H}_{25}\text{NO}_5 +\text{NH}_4^+$ : 413.2071; found: 413.2078, 1.7ppm.

Major diastereomer: ee was determined by HPLC analysis (Chiralcel AD-H, *i*-PrOH/ Hexane = 20/80, 1.0 mL/min, 247 nm.) Retention time:  $t_{\text{minor}}=14.37$  min,  $t_{\text{major}}=21.82$  min, ee=57 %.

**7a: tert-butyl (S)-((R)-3-benzoyl-2-oxotetrahydro-2H-pyran-3-yl)(phenyl)methylcarbamate**

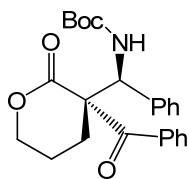

White solid, mp 146-147 °C.  $^1\text{H}$  NMR (300 MHz,  $\text{CDCl}_3$ ):  $\delta$  7.74(d,  $J$  = 7.5 Hz, 2 H), 7.19-7.51(m, 8 H), 6.84(d,  $J$  = 9.9 Hz, 1 H), 5.28(d,  $J$  = 9.6 Hz, 1 H), 4.15-4.22(m, 1 H), 3.85-3.93(m, 1 H), 2.42-2.49(m, 1 H), 1.92-2.01(m, 1 H), 1.64-1.74(m, 1 H), 1.36-1.42(m, 1 H), 1.50(s, 9 H);  $^{13}\text{C}$  NMR (75 MHz,  $\text{CDCl}_3$ ):  $\delta$  198.6, 170.0, 153.3, 137.1, 135.7, 131.5, 127.9, 127.6, 127.2, 126.9, 78.4, 68.2, 63.4, 59.1, 28.3, 27.2, 19.0. IR: 3422, 2963, 2927, 2855, 2254, 1712, 1487, 1366, 1233, 1166, 910, 733  $\text{cm}^{-1}$ . HRMS-ESI ( $m/z$ ): calcd for  $\text{C}_{24}\text{H}_{27}\text{NO}_5 + \text{H}^+$ : 410.1962; found: 410.1968, 1.5ppm.

Major diastereomer: ee was determined by HPLC analysis (Chiralcel AD-H, *i*-PrOH/ Hexane = 15/85, 1.0 mL/min, 245 nm.) Retention time:  $t_{\text{minor}}$  = 14.78 min,  $t_{\text{major}}$  = 27.84 min, ee = 30 %.

**8a: *tert*-butyl (*S*)-((*R*)-2-oxo-3-propionyltetrahydrofuran-3-yl)(phenyl)methylcarbamate**

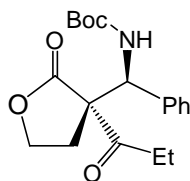

Colorless solid, mp 131 °C.  $^1\text{H}$  NMR (300 MHz,  $\text{CDCl}_3$ ):  $\delta$  7.57(m, 5 H), 6.64(d,  $J$  = 9.3 Hz, 1 H), 5.31(d,  $J$  = 9.6 Hz, 1 H), 4.02(dd,  $J$  = 8.4 Hz, 16.8 Hz, 1 H), 3.67-3.68(m, 1 H), 2.65-2.88(m, 2 H), 2.32-2.40(m, 1 H), 2.16-2.26(m, 1 H), 1.29(s, 9 H), 1.12(t,  $J$  = 6.9 Hz, 3 H);  $^{13}\text{C}$  NMR (75 MHz,  $\text{CDCl}_3$ ):  $\delta$  206.1, 176.1, 154.7, 137.2, 128.9, 128.6, 128.1, 80.1, 65.6, 64.1, 56.8, 31.9, 30.2, 28.2, 7.7. IR: 3425, 2986, 2915, 1773, 1695, 1500, 1457, 1371, 1216, 1168, 1026, 710  $\text{cm}^{-1}$ . HRMS-ESI ( $m/z$ ): calcd for  $\text{C}_{19}\text{H}_{25}\text{NO}_5 + \text{NH}_4^+$ : 365.2056; found: 365.2064, 1.9ppm.

Major diastereomer: ee was determined by HPLC analysis (Chiralcel AD-H, *i*-PrOH/ Hexane = 20/80, 1.0 mL/min, 212 nm.) Retention time:  $t_{\text{major}}$  = 6.11 min,  $t_{\text{minor}}$  = 11.0 min, ee = 90 %.

## 5.0 References.

- (1). T. Okino, Y. Hoashi, T. Furukawa, X. N. Xu and Y. Takemoto, *J. Am. Chem. Soc.* 2005, **127**, 119.
- (2). (a) X. X. Jiang, Y. F. Zhang, A. S. C. Chan and R. Wang, *Org. Lett.* 2009, **11**, 153; (b) X. X. Jiang, Y. F. Zhang, X. Liu, G. Zhang, L. H. Lai, L. P. Wu, J. N. Zhang and R. Wang, *J. Org. Chem.* 2009, **74**, 5562.

## 6.0 X-Ray structure of 5g

**The X-ray crystal structure of 5g:** *tert*-butyl (*R*)-((*R*)-3-acetyl-2-oxotetrahydrofuran-3-yl)  
(2-bromophenyl)methylcarbamate

(The CCDC deposition number : CCDC 760713.)

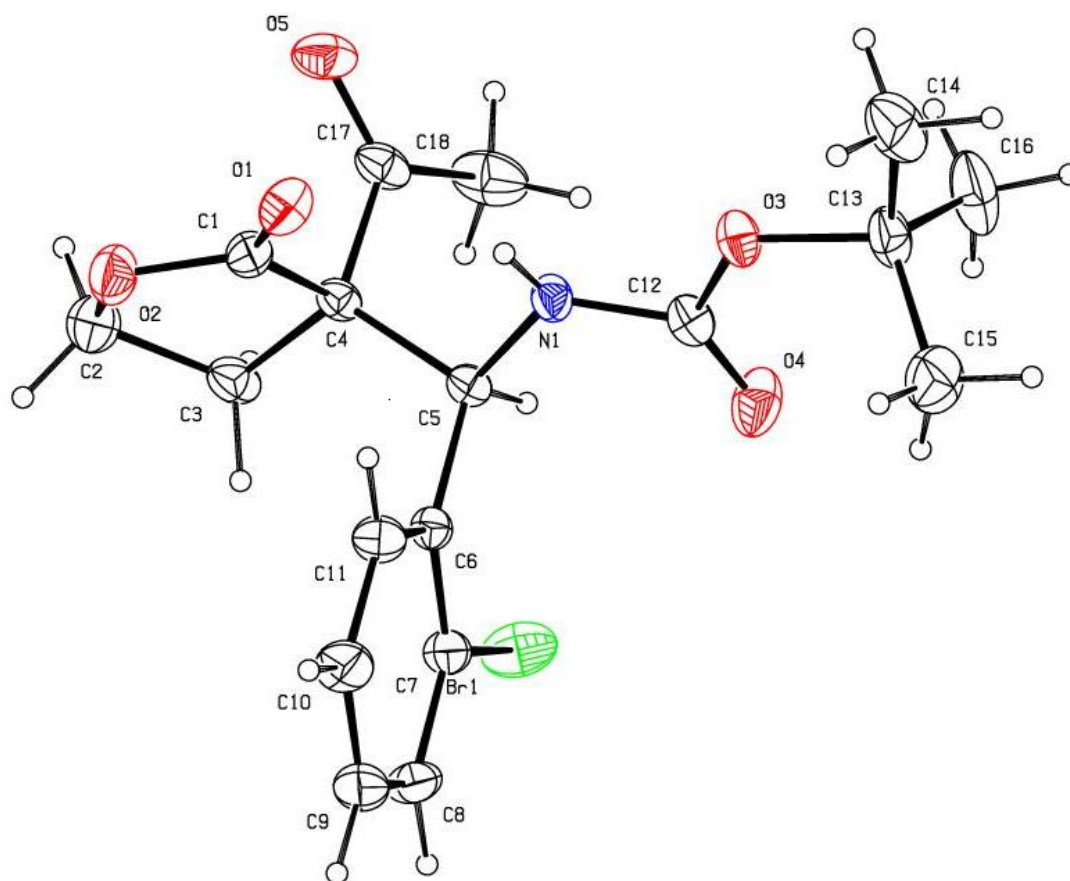

### 7.0 Copies of HPLC spectra of racemic /chiral products.

**3a:** (S)-ethyl 1-((S)-(tert-butoxycarbonylamino)(phenyl)methyl)-2-oxocyclopentane

carboxylate

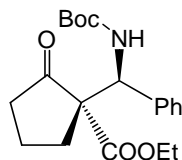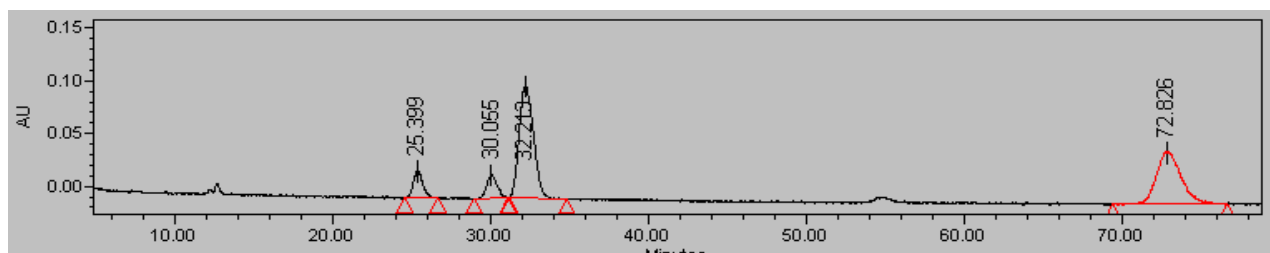

| Entry | Retention Time | Area    | Area (%) | Height | Int Type | Peak Type |
|-------|----------------|---------|----------|--------|----------|-----------|
| 1     | 25.399         | 1061303 | 7.48     | 25980  | bb       | Unknown   |
| 2     | 30.055         | 1014769 | 7.15     | 22761  | bb       | Unknown   |
| 3     | 32.213         | 6750276 | 47.58    | 105534 | bb       | Unknown   |
| 4     | 72.826         | 5361809 | 37.79    | 49218  | bb       | Unknown   |

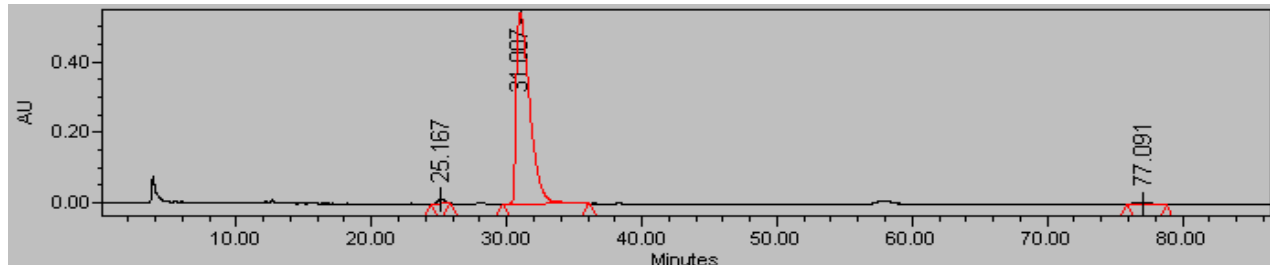

| Entry | Retention Time | Area     | Area (%) | Height | Int Type | Peak Type |
|-------|----------------|----------|----------|--------|----------|-----------|
| 1     | 25.167         | 431142   | 1.13     | 13739  | bb       | Unknown   |
| 2     | 31.007         | 37227751 | 97.89    | 540569 | bb       | Unknown   |
| 3     | 77.091         | 372937   | 0.98     | 4206   | bb       | Unknown   |

**3b: (S)-ethyl 1-((S)-(tert-butoxycarbonylamino)(naphthalen-1-yl)methyl)-2-oxocyclopentane**

carboxylate

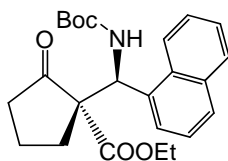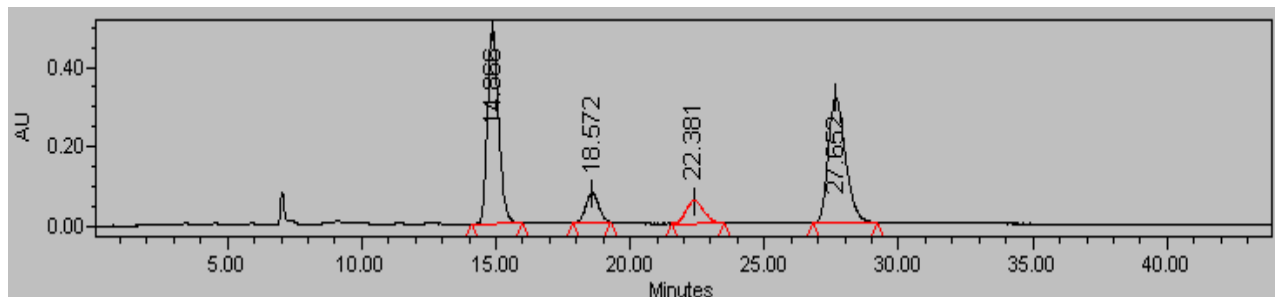

| Entry | Retention Time | Area     | Area (%) | Height | Int Type | Peak Type |
|-------|----------------|----------|----------|--------|----------|-----------|
| 1     | 14.866         | 14109290 | 42.17    | 493075 | bb       | Unknown   |
| 2     | 18.572         | 2581844  | 7.72     | 75899  | bb       | Unknown   |
| 3     | 22.381         | 2616502  | 7.82     | 57393  | bb       | Unknown   |
| 4     | 27.652         | 14149777 | 42.29    | 315978 | bb       | Unknown   |

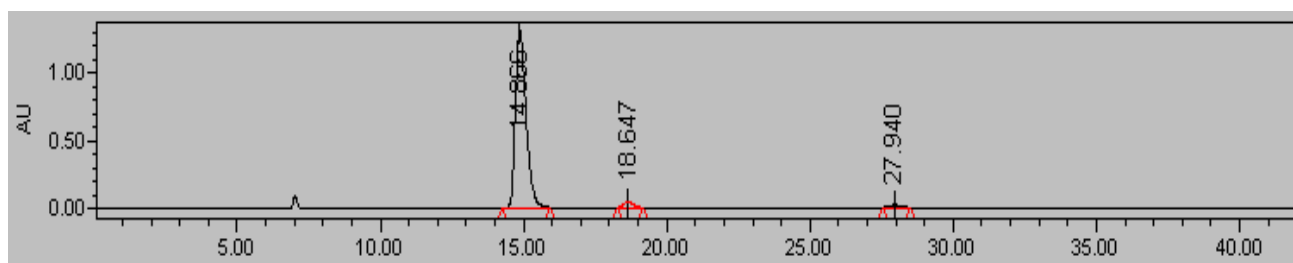

| Entry | Retention Time | Area     | Area (%) | Height  | Int Type | Peak Type |
|-------|----------------|----------|----------|---------|----------|-----------|
| 1     | 14.866         | 33703631 | 95.26    | 1315317 | bb       | Unknown   |
| 2     | 18.647         | 1108305  | 3.13     | 41573   | bb       | Unknown   |
| 3     | 27.940         | 567208   | 1.60     | 16801   | bb       | Unknown   |

**3c: (S)-ethyl 1-((R)-(tert-butoxycarbonylamino)(2-fluorophenyl)methyl)-2-oxocyclopentane**

carboxylate

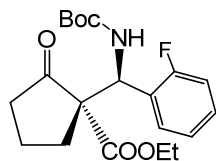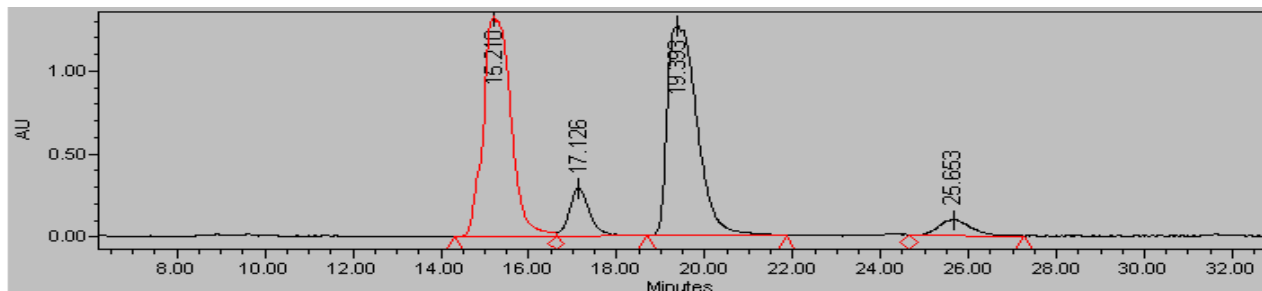

| Entry | Retention Time | Area     | Area (%) | Height  | Int Type | Peak Type |
|-------|----------------|----------|----------|---------|----------|-----------|
| 1     | 15.210         | 57570022 | 43.77    | 1321898 | bb       | Unknown   |
| 2     | 17.126         | 9296493  | 7.07     | 291556  | bb       | Unknown   |
| 3     | 19.393         | 59460051 | 45.21    | 1260556 | bb       | Unknown   |
| 4     | 25.653         | 5191613  | 3.95     | 97984   | bb       | Unknown   |

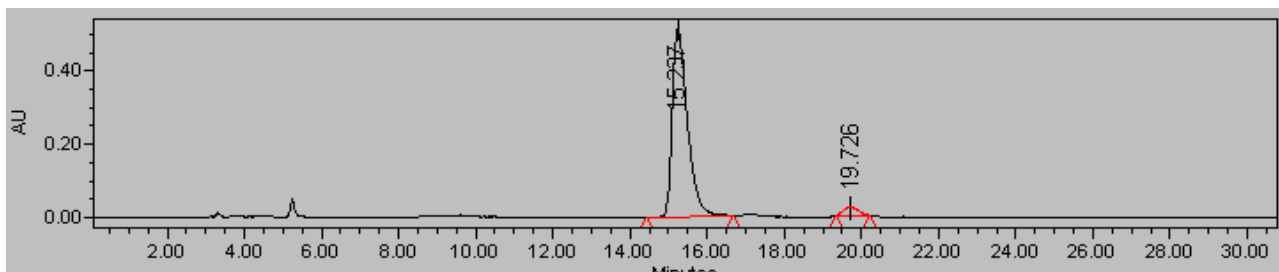

| Entry | Retention Time | Area     | Area (%) | Height | Int Type | Peak Type |
|-------|----------------|----------|----------|--------|----------|-----------|
| 1     | 15.237         | 13924307 | 95.83    | 513347 | bb       | Unknown   |
| 2     | 19.726         | 605354   | 4.17     | 22257  | bb       | Unknown   |

**3d: (S)-ethyl 1-((S)-(tert-butoxycarbonylamino)(3-methoxyphenyl)methyl)-2-oxocyclopentane-3-carboxylate**

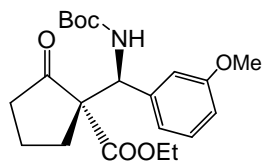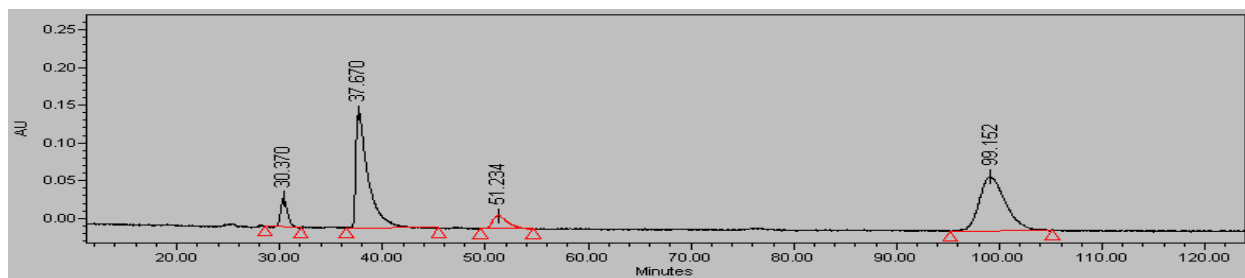

| Entry | Retention Time | Area     | Area (%) | Height | Int Type | Peak Type |
|-------|----------------|----------|----------|--------|----------|-----------|
| 1     | 30.370         | 1788198  | 6.23     | 37998  | bb       | Unknown   |
| 2     | 37.670         | 12627795 | 43.98    | 153125 | bb       | Unknown   |
| 3     | 51.234         | 1672586  | 5.82     | 17154  | bb       | Unknown   |
| 4     | 99.152         | 12626779 | 43.97    | 72318  | bb       | Unknown   |

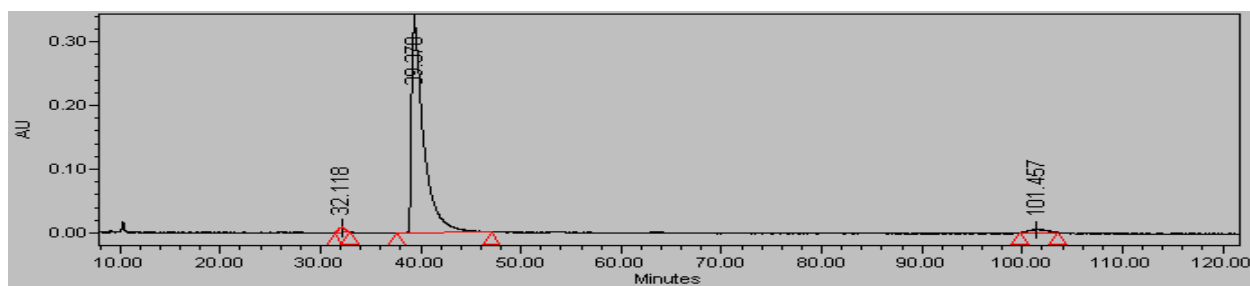

| Entry | Retention Time | Area     | Area (%) | Height | Int Type | Peak Type |
|-------|----------------|----------|----------|--------|----------|-----------|
| 1     | 32.118         | 363551   | 1.26     | 8009   | bb       | Unknown   |
| 2     | 39.370         | 27864087 | 96.51    | 326258 | bb       | Unknown   |
| 3     | 101.457        | 643995   | 2.23     | 5425   | bb       | Unknown   |



**5a: *tert*-butyl (*S*)-((*R*)-3-acetyl-2-oxotetrahydrofuran-3-yl)(phenyl)methylcarbamate**

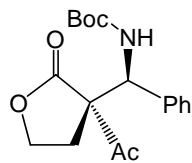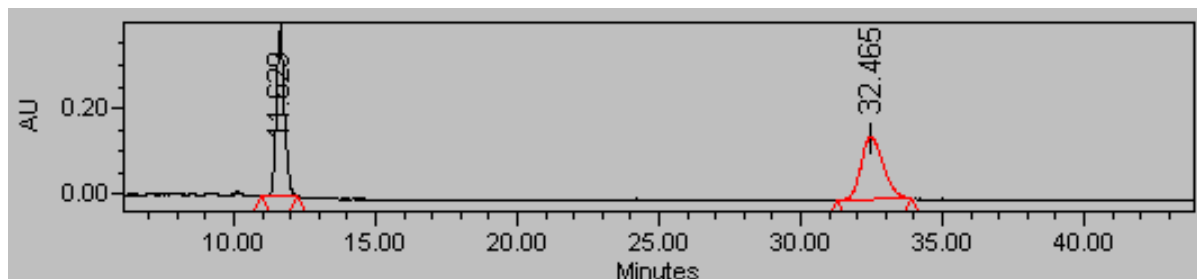

| Entry | Retention Time | Area    | Area (%) | Height | Int Type | Peak Type |
|-------|----------------|---------|----------|--------|----------|-----------|
| 1     | 11.629         | 7714918 | 49.05    | 383352 | bb       | Unknown   |
| 2     | 32.465         | 8013356 | 50.95    | 145952 | bb       | Unknown   |

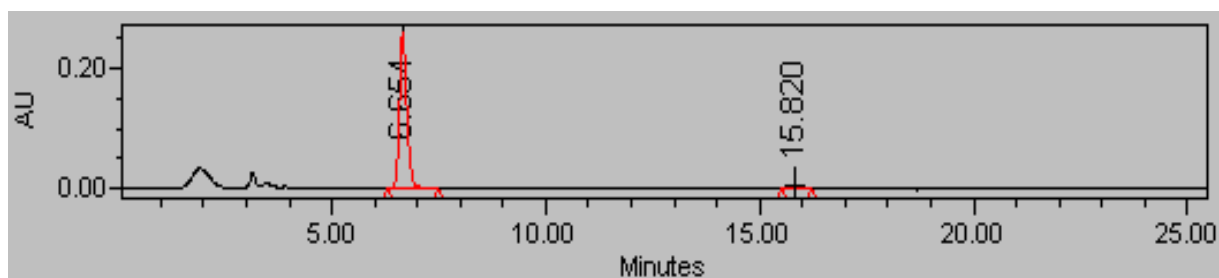

| Entry | Retention Time | Area    | Area (%) | Height | Int Type | Peak Type |
|-------|----------------|---------|----------|--------|----------|-----------|
| 1     | 6.654          | 3104104 | 95.51    | 257631 | bb       | Unknown   |
| 2     | 15.820         | 146033  | 4.49     | 6332   | bb       | Unknown   |

**5b: tert-butyl (S)-((R)-3-acetyl-2-oxotetrahydrofuran-3-yl)(p-tolyl)methylcarbamate**

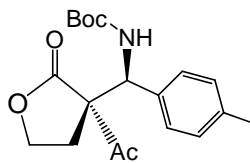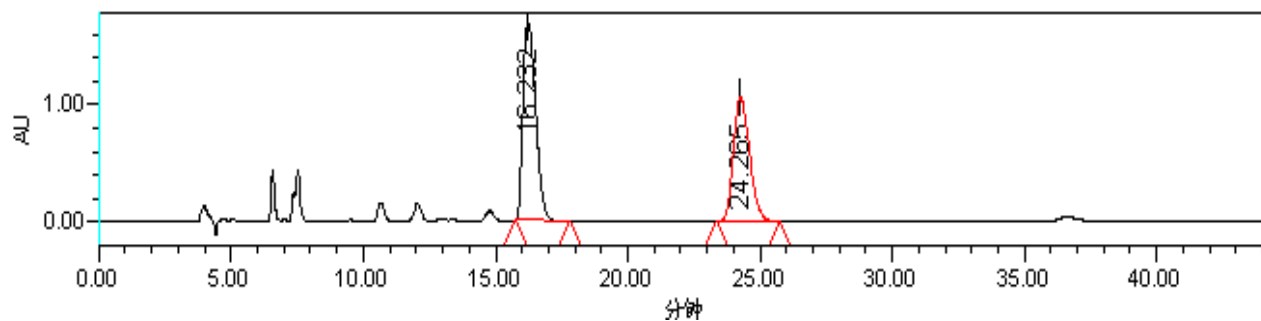

| Entry | Retention Time | Area     | Area (%) | Height  | Int Type | Peak Type |
|-------|----------------|----------|----------|---------|----------|-----------|
| 1     | 16.232         | 56140855 | 55.37    | 1677617 | bb       | Unknown   |
| 2     | 24.265         | 45242931 | 44.63    | 1050736 | bb       | Unknown   |

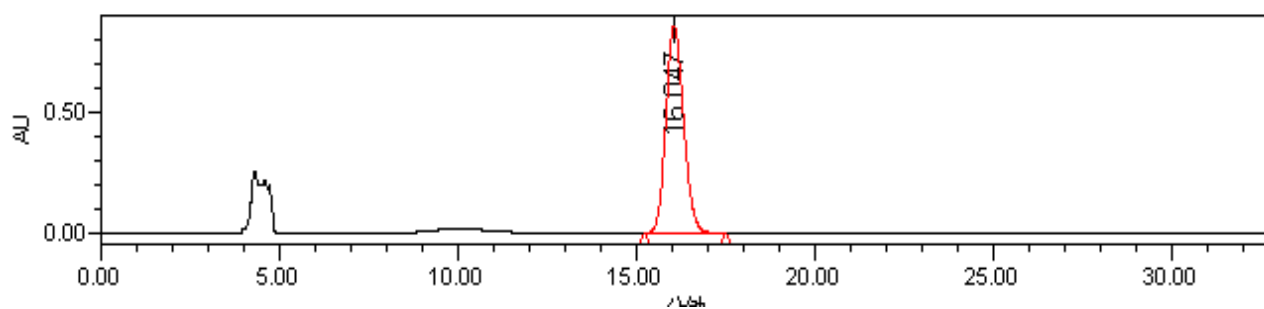

| Entry | Retention Time | Area     | Area(%) | Height | Int Type | Peak Type |
|-------|----------------|----------|---------|--------|----------|-----------|
| 1     | 16.047         | 19786203 | 100.00  | 579181 | bb       | Unknown   |
| 2     | 24.600         | 805      | 0.00    | -43    | bb       | Unknown   |

**5c: *tert*-butyl (*S*)-((*R*)-3-acetyl-2-oxotetrahydrofuran-3-yl)(*o*-tolyl)methylcarbamate**

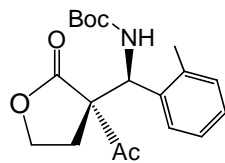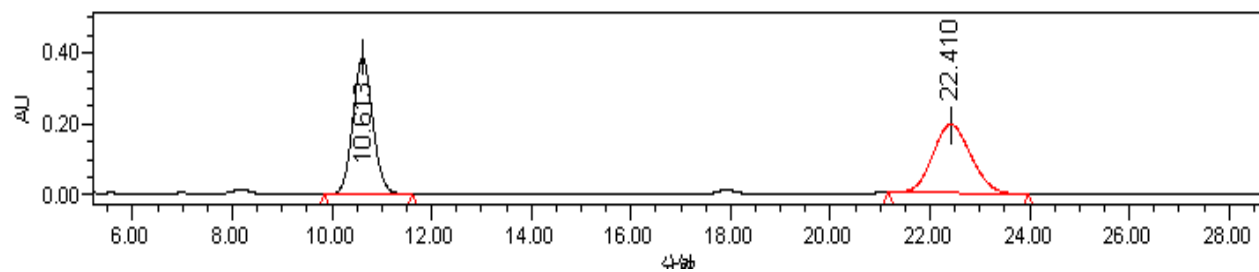

| Entry | Retention Time | Area     | Area (%) | Height | Int Type | Peak Type |
|-------|----------------|----------|----------|--------|----------|-----------|
| 1     | 10.613         | 10578988 | 50.83    | 383516 | bb       | Unknown   |
| 2     | 22.410         | 10234550 | 49.17    | 193316 | bb       | Unknown   |

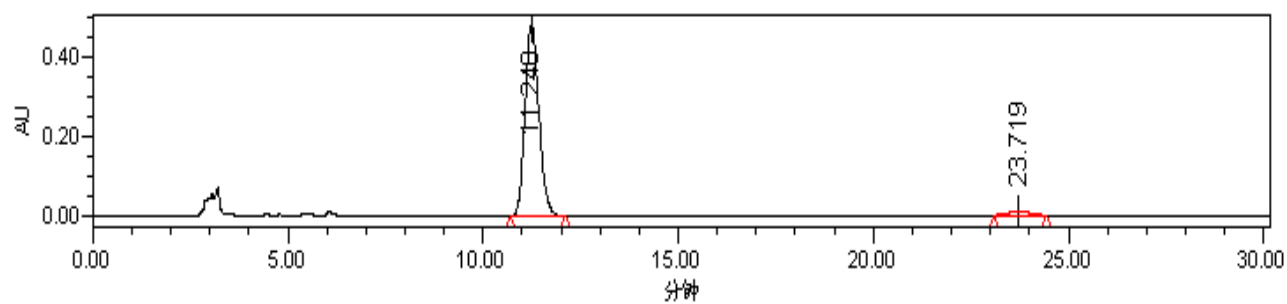

| Entry | Retention Time | Area     | Area (%) | Height | Int Type | Peak Type |
|-------|----------------|----------|----------|--------|----------|-----------|
| 1     | 11.240         | 11901811 | 96.57    | 482065 | bb       | Unknown   |
| 2     | 23.719         | 422183   | 3.43     | 9442   | bb       | Unknown   |

**5d: *tert*-butyl (*S*)-((*R*)-3-acetyl-2-oxotetrahydrofuran-3-yl)(2-methoxyphenyl)methylcarbamate**

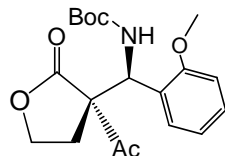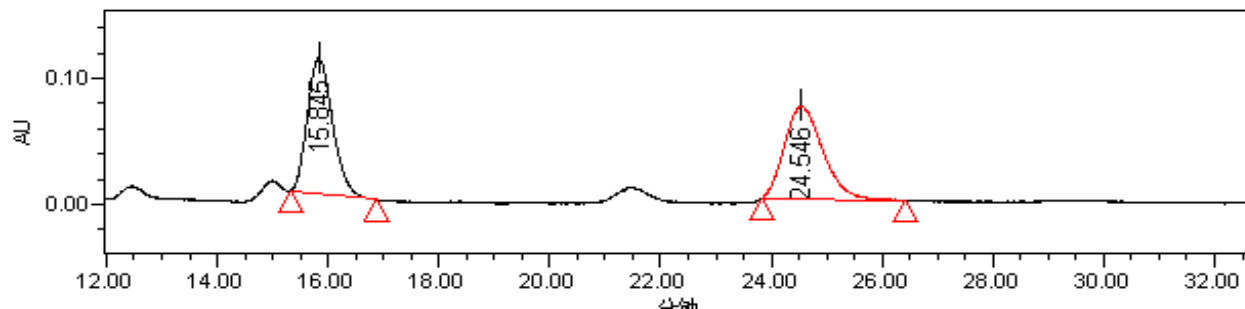

| Entry | Retention Time | Area    | Area (%) | Height | Int Type | Peak Type |
|-------|----------------|---------|----------|--------|----------|-----------|
| 1     | 15.845         | 3305170 | 49.96    | 106684 | bb       | Unknown   |
| 2     | 24.546         | 3310453 | 50.04    | 72198  | bb       | Unknown   |

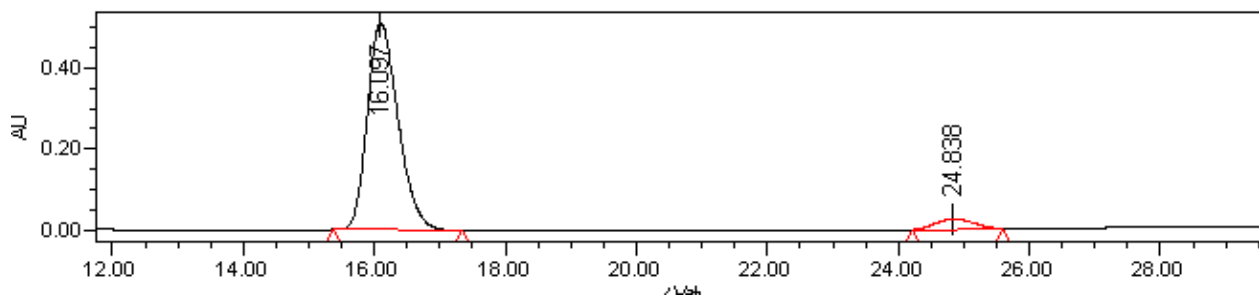

| Entry | Retention Time | Area     | Area (%) | Height | Int Type | Peak Type |
|-------|----------------|----------|----------|--------|----------|-----------|
| 1     | 16.097         | 16704411 | 94.12    | 511686 | bb       | Unknown   |
| 2     | 24.838         | 1043062  | 5.88     | 25790  | bb       | Unknown   |

**5e: *tert*-butyl (*S*)-((*R*)-3-acetyl-2-oxotetrahydrofuran-3-yl)(3-methoxyphenyl)methylcarbamate**

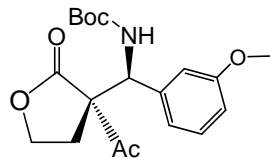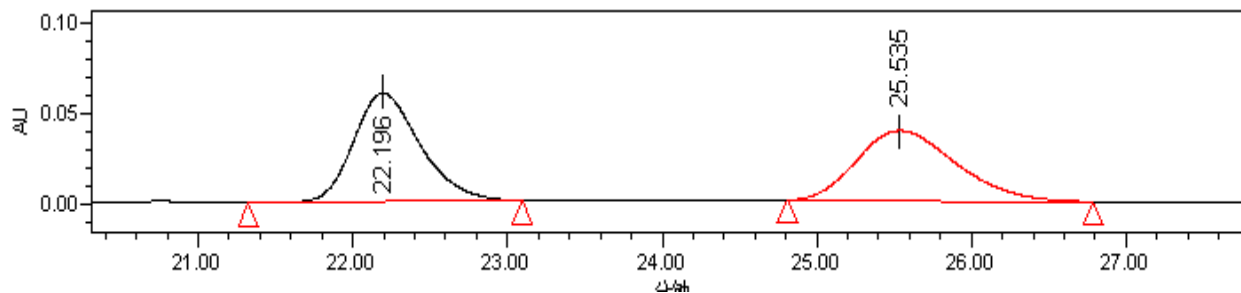

| Entry | Retention Time | Area    | Area (%) | Height | Int Type | Peak Type |
|-------|----------------|---------|----------|--------|----------|-----------|
| 1     | 22.196         | 1804146 | 50.69    | 60266  | bb       | Unknown   |
| 2     | 25.535         | 1755228 | 49.31    | 39173  | bb       | Unknown   |

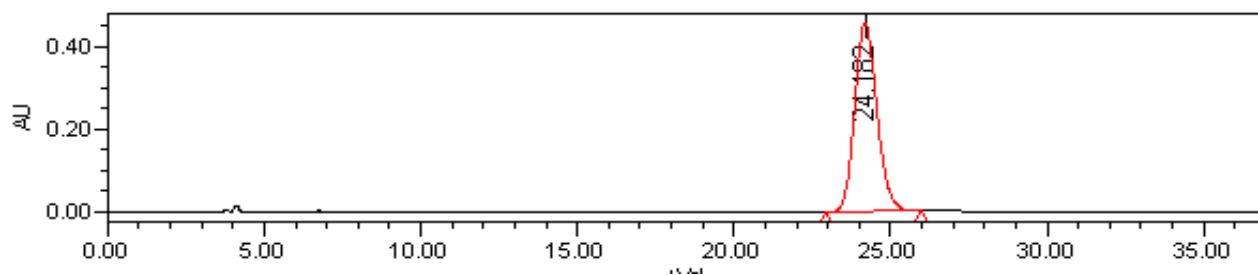

| Entry | Retention Time | Area     | Area (%) | Height | Int Type | Peak Type |
|-------|----------------|----------|----------|--------|----------|-----------|
| 1     | 24.182         | 22300762 | 100.00   | 454724 | bb       | Unknown   |
|       |                |          |          |        |          |           |

**5f: tert-butyl (S)-((R)-3-acetyl-2-oxotetrahydrofuran-3-yl)(m-tolyl)methylcarbamate**

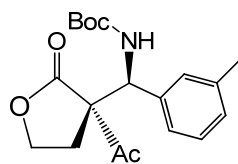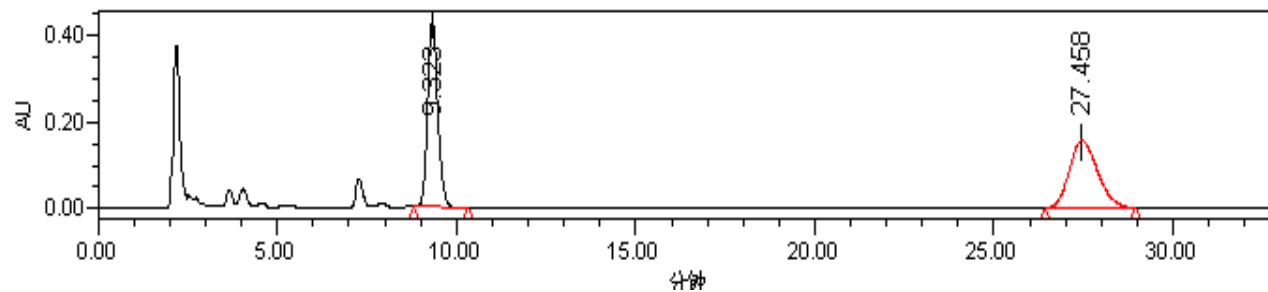

| Entry | Retention Time | Area    | Area (%) | Height | Int Type | Peak Type |
|-------|----------------|---------|----------|--------|----------|-----------|
| 1     | 9.323          | 8579092 | 49.97    | 430607 | bb       | Unknown   |
| 2     | 27.458         | 8589667 | 50.03    | 156280 | bb       | Unknown   |

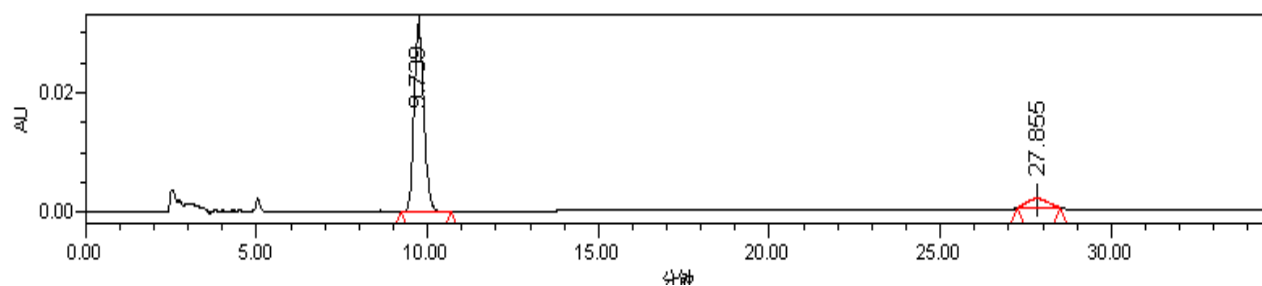

| Entry | Retention Time | Area   | Area (%) | Height | Int Type | Peak Type |
|-------|----------------|--------|----------|--------|----------|-----------|
| 1     | 9.739          | 630727 | 91.00    | 31451  | bb       | Unknown   |
| 2     | 27.855         | 62404  | 9.00     | 1517   | bb       | Unknown   |

**5g: *tert*-butyl (*R*)-((*R*)-3-acetyl-2-oxotetrahydrofuran-3-yl)(2-bromophenyl)methylcarbamate**

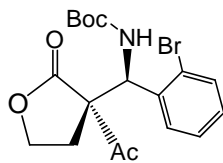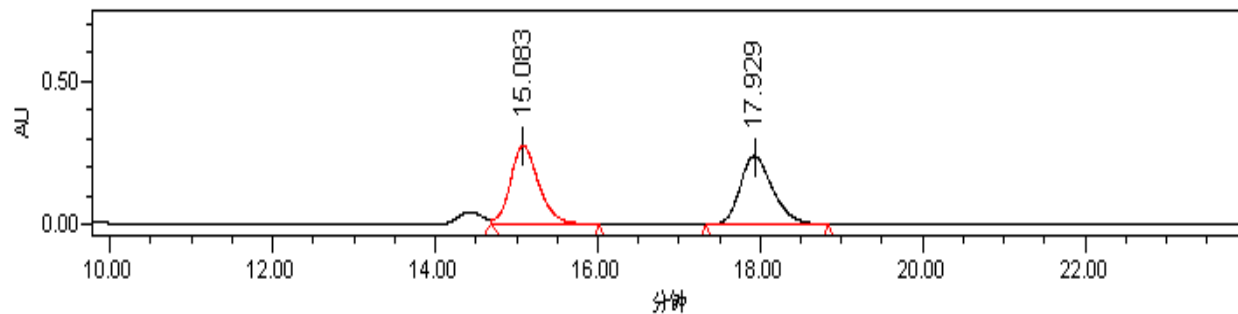

| Entry | Retention Time | Area    | Area (%) | Height | Int Type | Peak Type |
|-------|----------------|---------|----------|--------|----------|-----------|
| 1     | 15.083         | 6705176 | 50.38    | 274903 | bb       | Unknown   |
| 2     | 17.929         | 6604471 | 49.62    | 238117 | bb       | Unknown   |

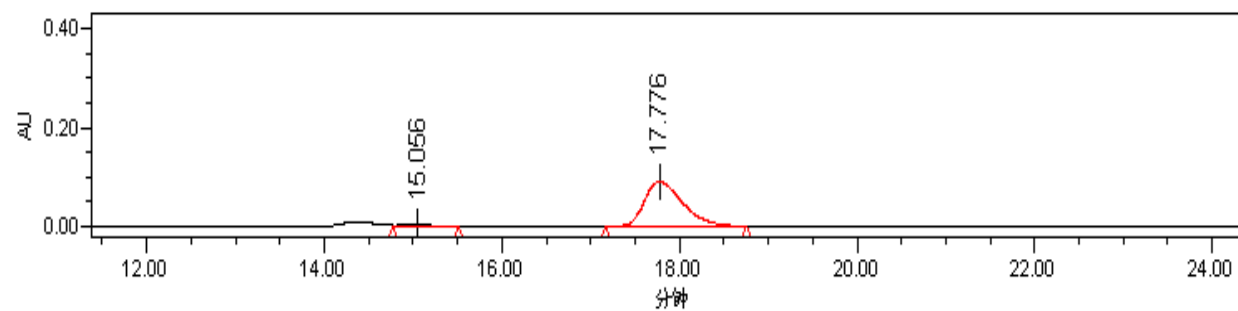

| Entry | Retention Time | Area    | Area (%) | Height | Int Type | Peak Type |
|-------|----------------|---------|----------|--------|----------|-----------|
| 1     | 15.056         | 26764   | 0.99     | 1484   | bb       | Unknown   |
| 2     | 17.776         | 2667108 | 99.01    | 90460  | bb       | Unknown   |

**5h: *tert*-butyl (*R*)-((*R*)-3-acetyl-2-oxotetrahydrofuran-3-yl)(2-fluorophenyl)methylcarbamate**

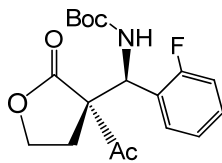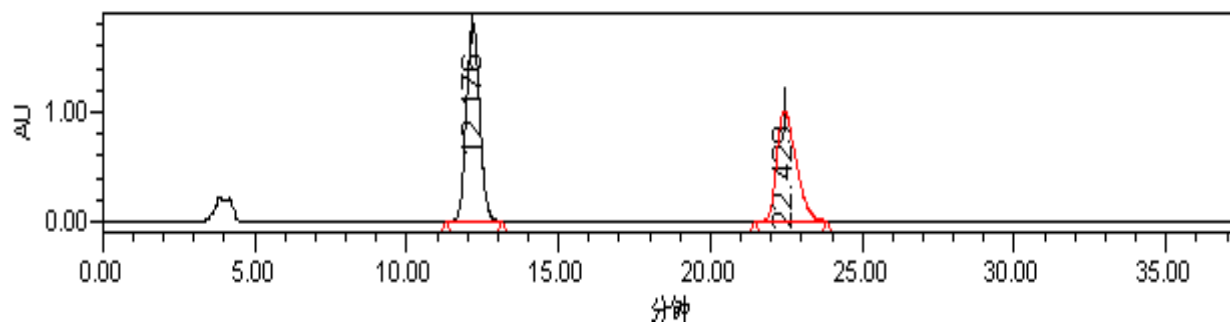

| Entry | Retention Time | Area     | Area (%) | Height  | Int Type | Peak Type |
|-------|----------------|----------|----------|---------|----------|-----------|
| 1     | 12.176         | 55543409 | 55.71    | 1806276 | bb       | Unknown   |
| 2     | 22.429         | 44162198 | 44.29    | 1002608 | bb       | Unknown   |

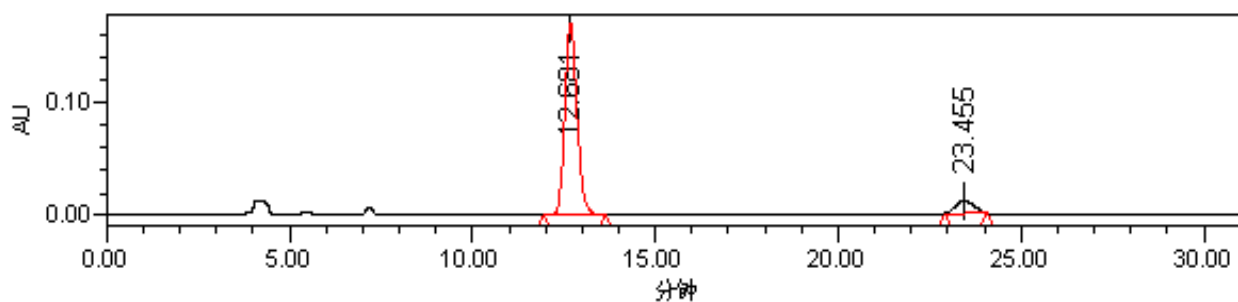

| Entry | Retention Time | Area    | Area (%) | Height | Int Type | Peak Type |
|-------|----------------|---------|----------|--------|----------|-----------|
| 1     | 12.681         | 3935660 | 90.67    | 169615 | bb       | Unknown   |
| 2     | 23.455         | 404998  | 9.33     | 11397  | bb       | Unknown   |



**5i: tert-butyl (S)-((R)-3-acetyl-2-oxotetrahydrofuran-3-yl)(4-chlorophenyl)methylcarbamate**

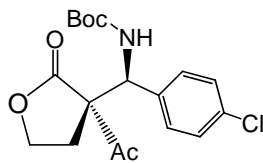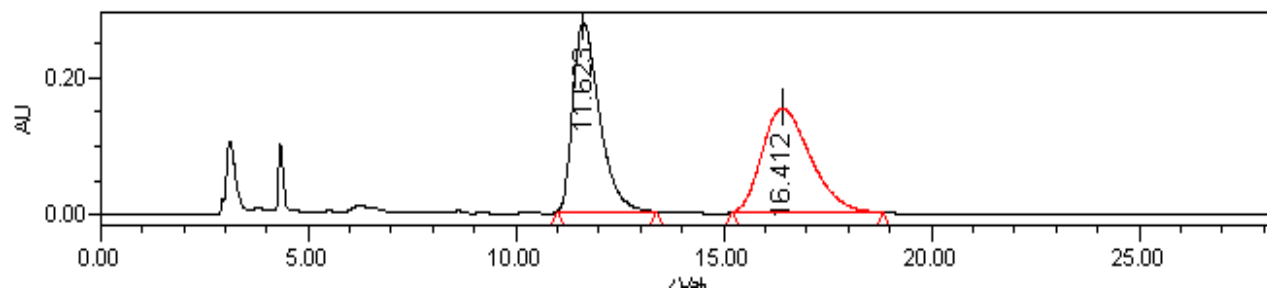

| Entry | Retention Time | Area     | Area (%) | Height | Int Type | Peak Type |
|-------|----------------|----------|----------|--------|----------|-----------|
| 1     | 11.623         | 12329132 | 50.01    | 277111 | bb       | Unknown   |
| 2     | 16.412         | 12322472 | 49.99    | 152059 | bb       | Unknown   |

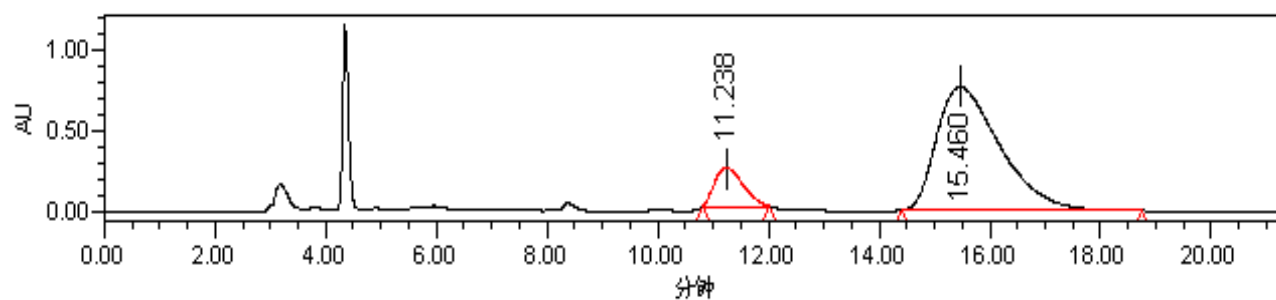

| Entry | Retention Time | Area     | Area (%) | Height | Int Type | Peak Type |
|-------|----------------|----------|----------|--------|----------|-----------|
| 1     | 11.238         | 8583491  | 12.34    | 240183 | bb       | Unknown   |
| 2     | 15.460         | 60985158 | 87.66    | 765574 | bb       | Unknown   |

**5j: tert-butyl (R)-((R)-3-acetyl-2-oxotetrahydrofuran-3-yl)(thiophen-2-yl)methylcarbamate**

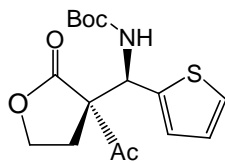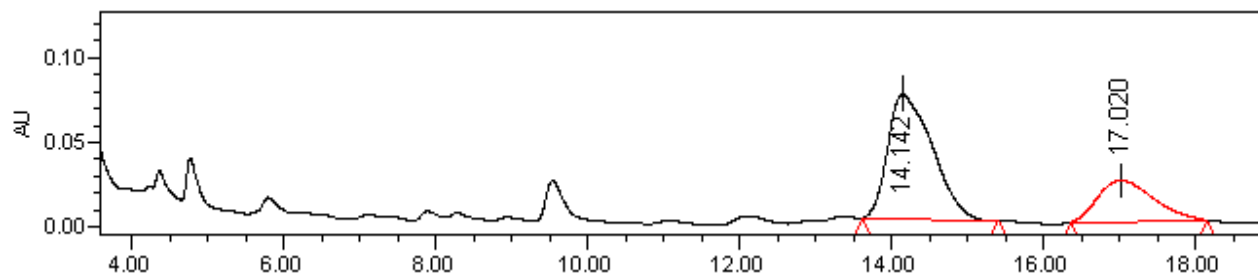

| Entry | Retention Time | Area    | Area (%) | Height | Int Type | Peak Type |
|-------|----------------|---------|----------|--------|----------|-----------|
| 1     | 14.142         | 2993541 | 70.94    | 73410  | bb       | Unknown   |
| 2     | 17.020         | 1226225 | 29.06    | 24246  | bb       | Unknown   |

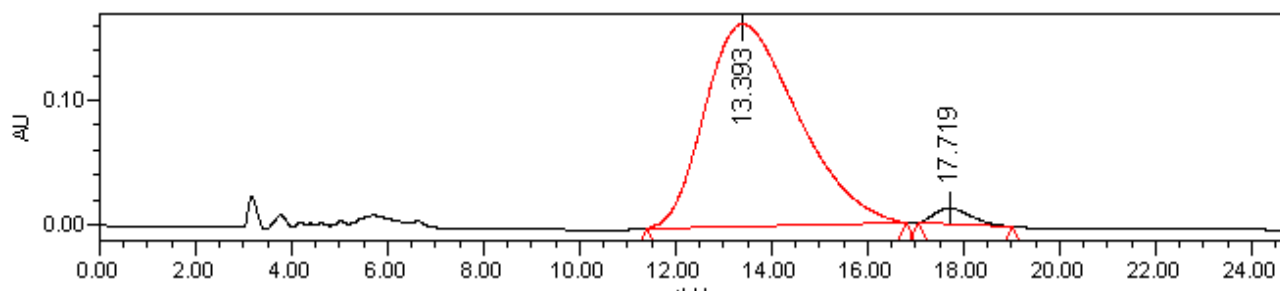

| Entry | Retention Time | Area     | Area (%) | Height | Int Type | Peak Type |
|-------|----------------|----------|----------|--------|----------|-----------|
| 1     | 13.393         | 21830132 | 96.99    | 161961 | bb       | Unknown   |
| 2     | 17.719         | 677564   | 3.01     | 12688  | bb       | Unknown   |

**5k: *tert*-butyl (*S*)-((*R*)-3-acetyl-2-oxotetrahydrofuran-3-yl)(furan-3-yl)methylcarbamate**

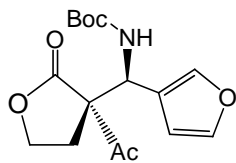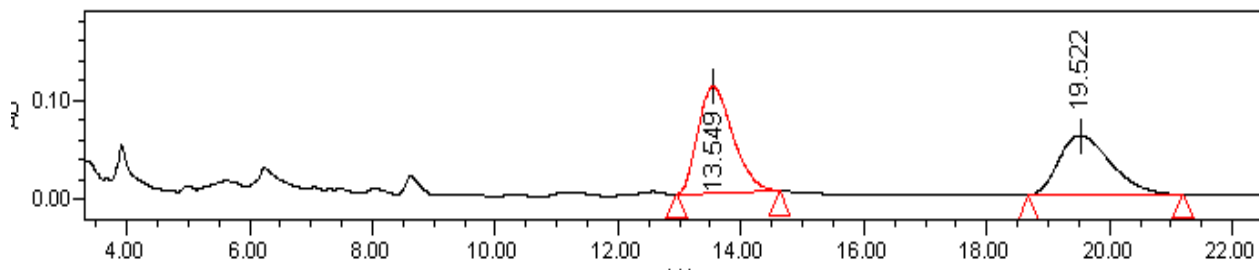

| Entry | Retention Time | Area    | Area (%) | Height | Int Type | Peak Type |
|-------|----------------|---------|----------|--------|----------|-----------|
| 1     | 13.549         | 4236471 | 54.54    | 107222 | bb       | Unknown   |
| 2     | 19.522         | 3531690 | 45.46    | 60060  | bb       | Unknown   |

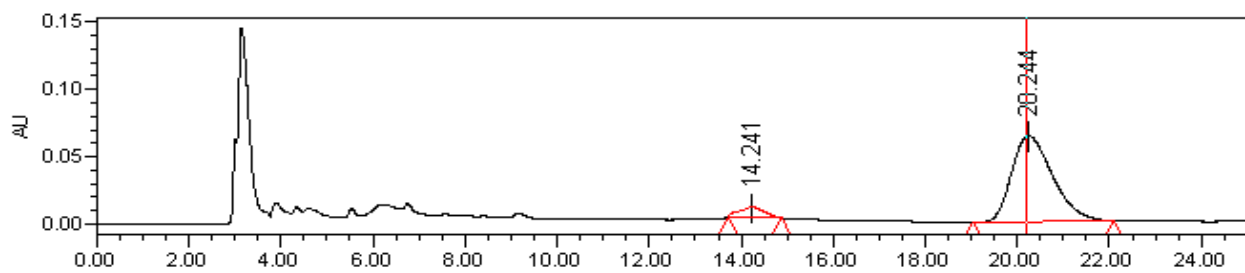

| Entry | Retention Time | Area    | Area (%) | Height | Int Type | Peak Type |
|-------|----------------|---------|----------|--------|----------|-----------|
| 1     | 14.241         | 274567  | 6.52     | 7263   | bb       | Unknown   |
| 2     | 20.244         | 3937079 | 93.48    | 63735  | bb       | Unknown   |

**6a: *tert*-butyl (*S*)-((*R*)-3-benzoyl-2-oxotetrahydrofuran-3-yl)(phenyl)methylcarbamate**

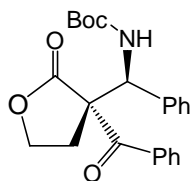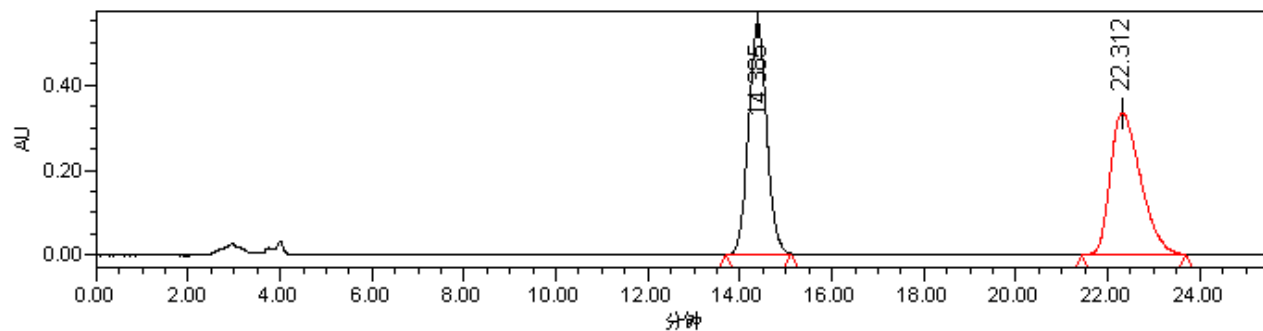

| Entry | Retention Time | Area     | Area (%) | Height | Int Type | Peak Type |
|-------|----------------|----------|----------|--------|----------|-----------|
| 1     | 14.385         | 14905498 | 49.57    | 542229 | bb       | Unknown   |
| 2     | 22.312         | 15161127 | 50.43    | 332086 | bb       | Unknown   |

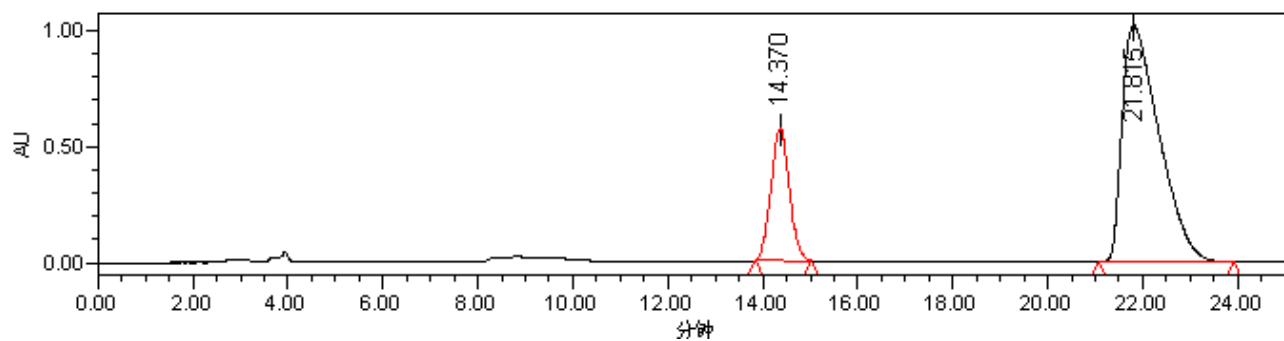

| Entry | Retention Time | Area     | Area (%) | Height  | Int Type | Peak Type |
|-------|----------------|----------|----------|---------|----------|-----------|
| 1     | 14.370         | 15371234 | 21.73    | 569969  | bb       | Unknown   |
| 2     | 21.815         | 55379264 | 78.27    | 1021933 | bb       | Unknown   |

**7a: *tert*-butyl (*S*)-((*R*)-3-benzoyl-2-oxotetrahydro-2H-pyran-3-yl)(phenyl)methylcarbamate**

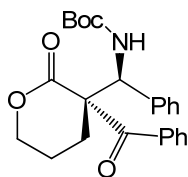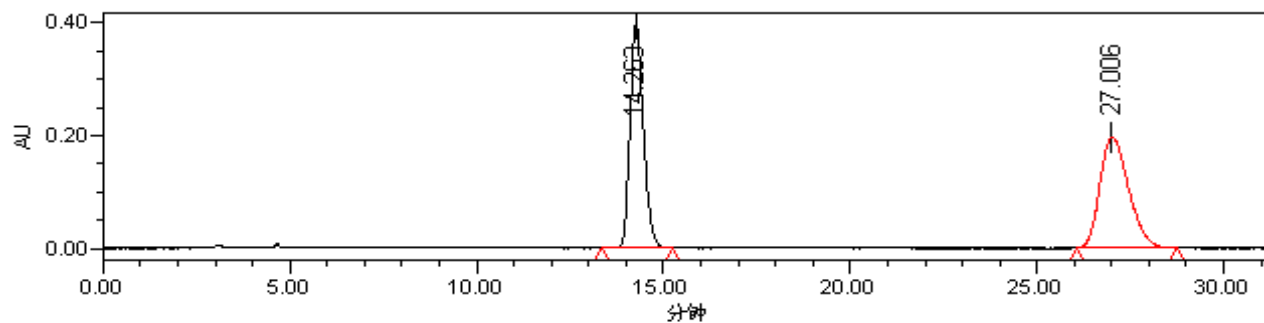

| Entry | Retention Time | Area     | Area (%) | Height | Int Type | Peak Type |
|-------|----------------|----------|----------|--------|----------|-----------|
| 1     | 14.263         | 9862841  | 48.53    | 397239 | bb       | Unknown   |
| 2     | 27.006         | 10462204 | 51.47    | 197160 | bb       | Unknown   |

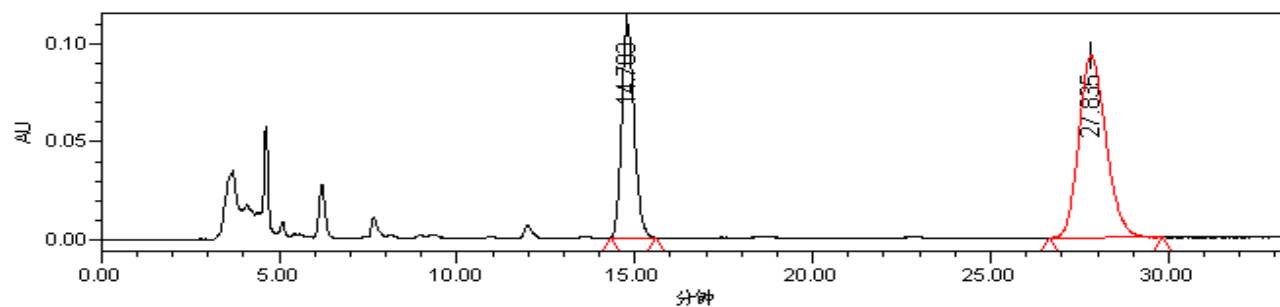

| Entry | Retention Time | Area    | Area (%) | Height | Int Type | Peak Type |
|-------|----------------|---------|----------|--------|----------|-----------|
| 1     | 14.783         | 2685478 | 35.34    | 109010 | bb       | Unknown   |
| 2     | 27.835         | 4913932 | 64.66    | 92670  | bb       | Unknown   |

**8a: *tert*-butyl (*S*)-((*R*)-2-oxo-3-propionyltetrahydrofuran-3-yl)(phenyl)methylcarbamate**

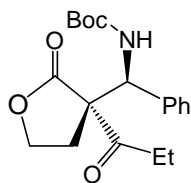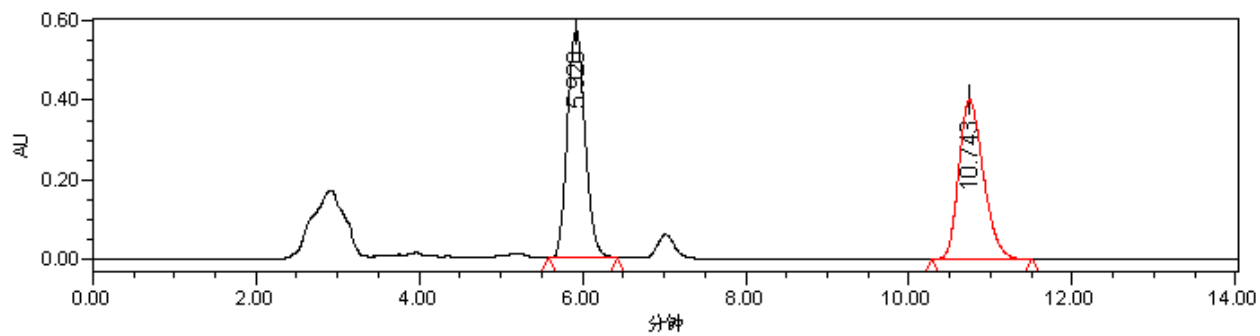

| Entry | Retention Time | Area    | Area (%) | Height | Int Type | Peak Type |
|-------|----------------|---------|----------|--------|----------|-----------|
| 1     | 5.920          | 9305783 | 50.65    | 619077 | bb       | Unknown   |
| 2     | 10.743         | 9065509 | 49.35    | 433638 | bb       | Unknown   |

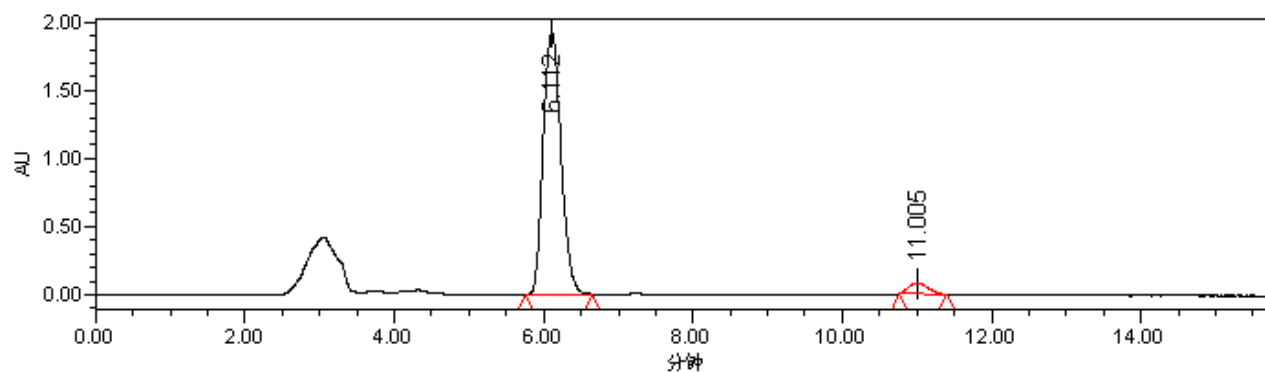

| Entry | Retention Time | Area     | Area (%) | Height  | Int Type | Peak Type |
|-------|----------------|----------|----------|---------|----------|-----------|
| 1     | 6.112          | 31783495 | 95.58    | 1924229 | bb       | Unknown   |
| 2     | 11.005         | 1469640  | 4.42     | 80758   | bb       | Unknown   |

## 8.0 Copies of NMR spectra of products.

### 4b: 3-benzoyldihydrofuran-2(3H)-one

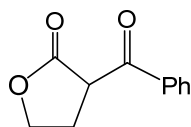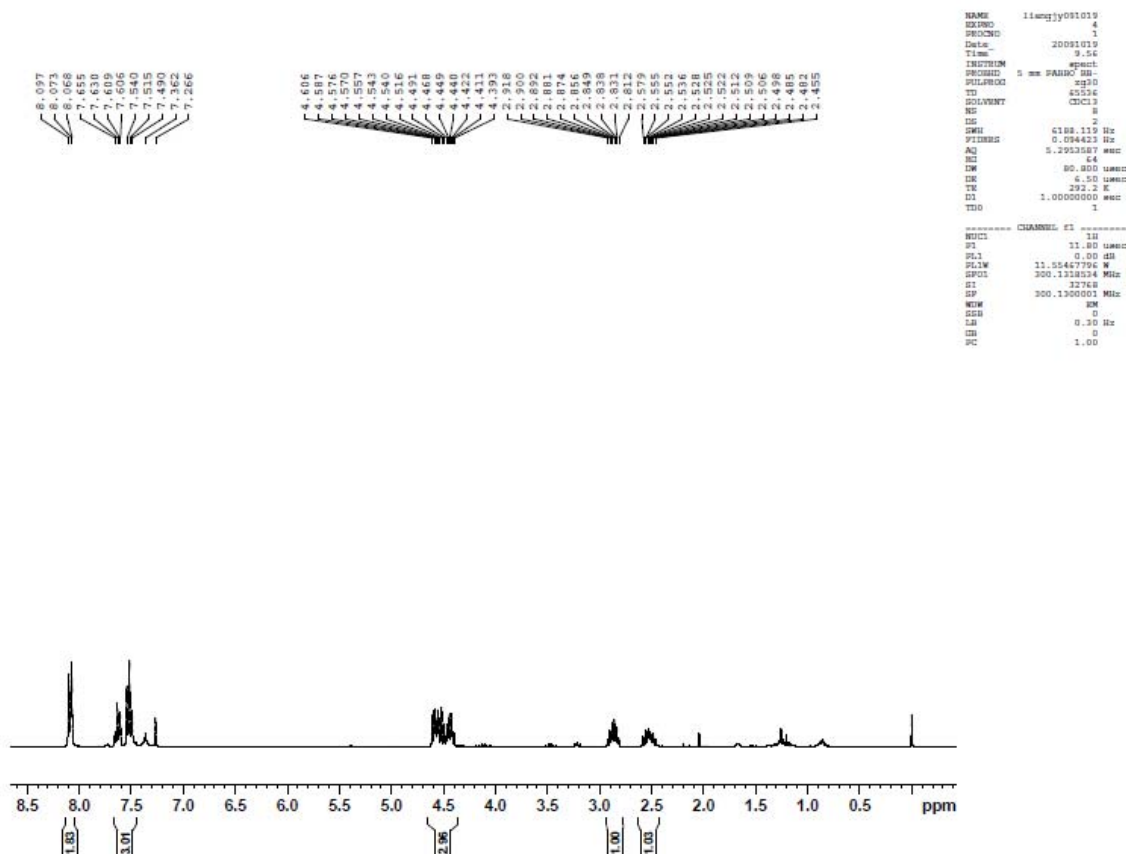

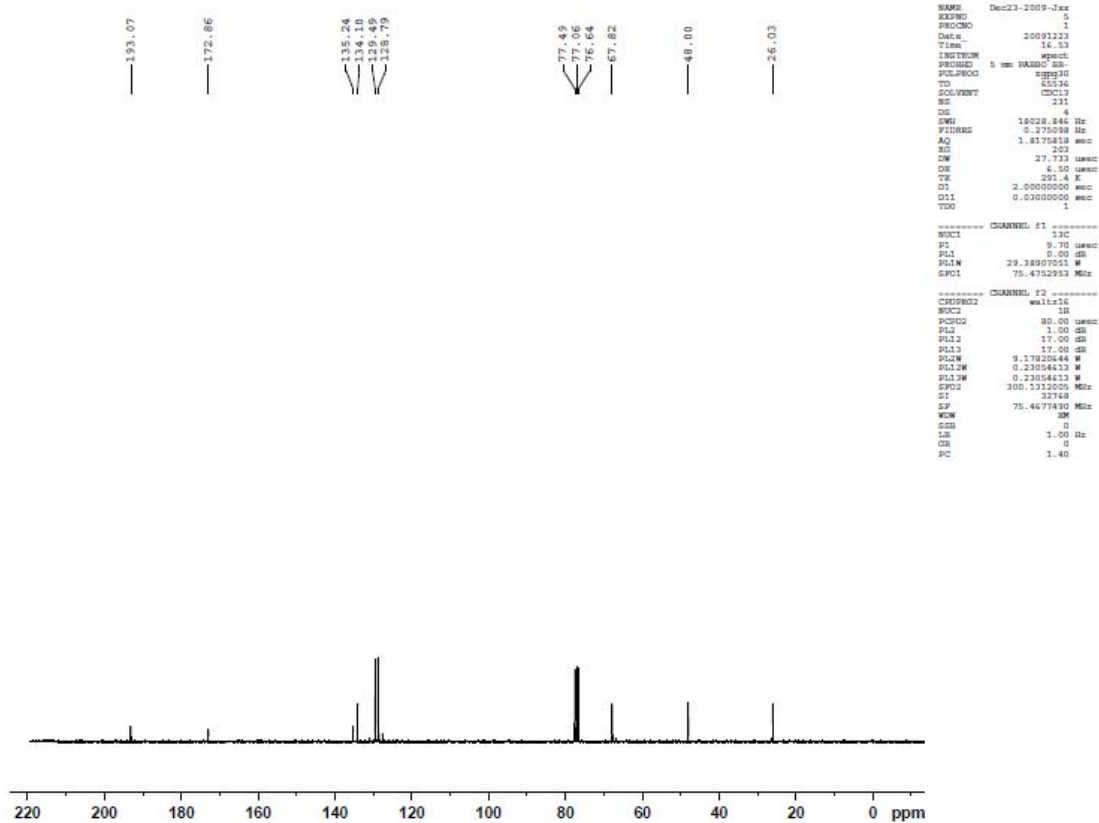



**4c: 3-benzoyltetrahydro-2H-pyran-2-one**

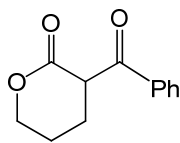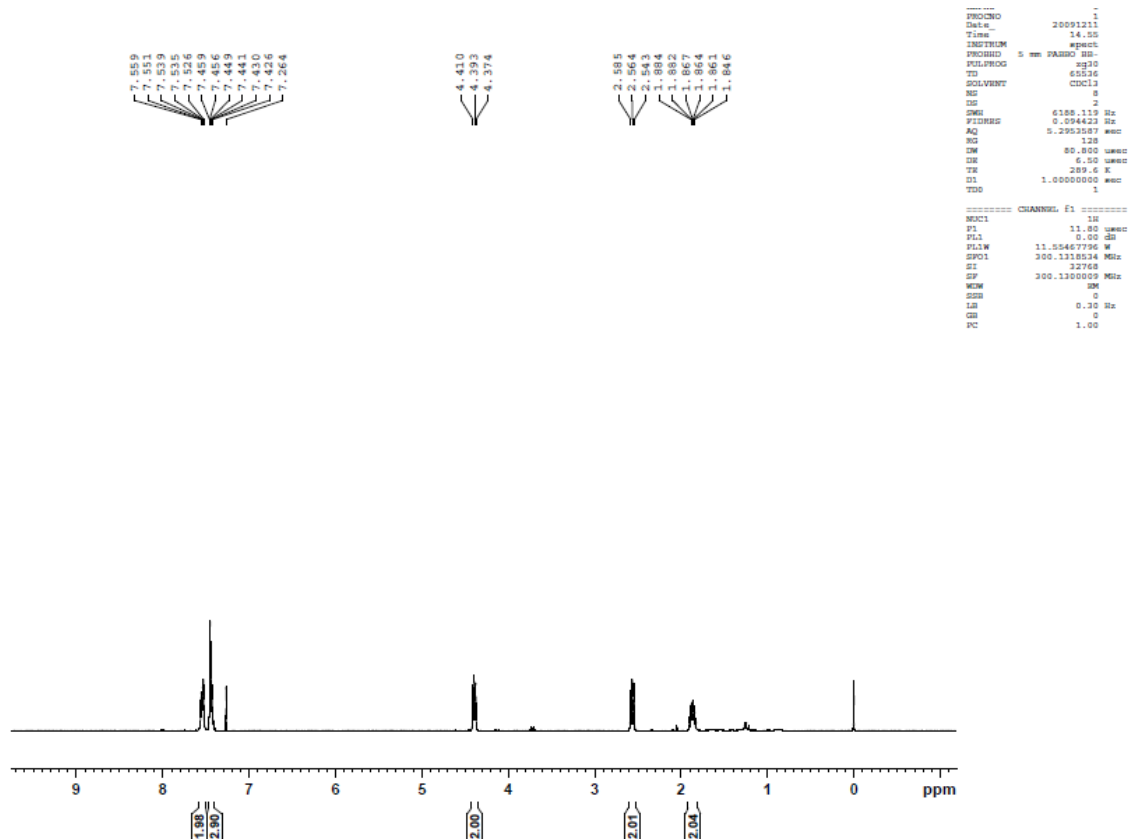

Supplementary Material (ESI) for Chemical Communications  
This journal is (c) The Royal Society of Chemistry 2010

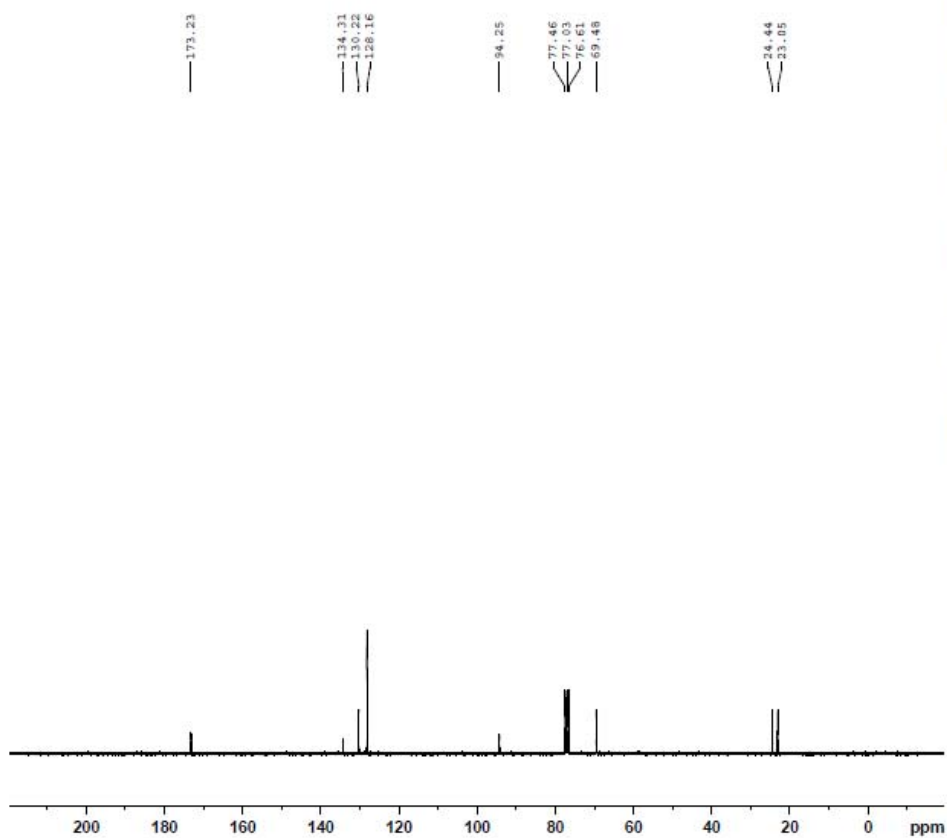

```
NAME Dec23-2009-Jax
EXPNO 2
PROCNO 1
Date_ 20091223
Time 14.12
INSTRUM spect
PROBHD 5 mm PABBO QNP-
PULPROG zgpg30
TD 65536
SOLVENT CDCl3
NS 542
DS 4
AQ 18028.846 Hz
FIDRES 0.275598 Hz
AQ 1.8175418 sec
RG 323
DW 27.733 usec
DE 6.50 usec
TE 291.5 K
D1 2.0000000 sec
D11 0.0300000 sec
TD0 1
===== CHANNEL f1 =====
NUC1 13C
P1 9.70 usec
PL1 0.00 dB
PULP1 29.3897011 W
SFO1 75.4752853 MHz
===== CHANNEL f2 =====
CHPROG2 waltz16
NUC2 1H
PCPD2 80.00 usec
PD2 1.00 dB
PUL2 17.00 dB
PL12 9.1782044 W
PULP2 0.23054413 W
SFO2 300.1352000 MHz
SI 22768
SF 75.4677430 MHz
WCN DM
SGB 0
LB 1.00 Hz
GB 0
PC 1.40
```

**4d: 3-propionyl-dihydrofuran-2(3H)-one**

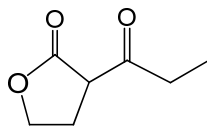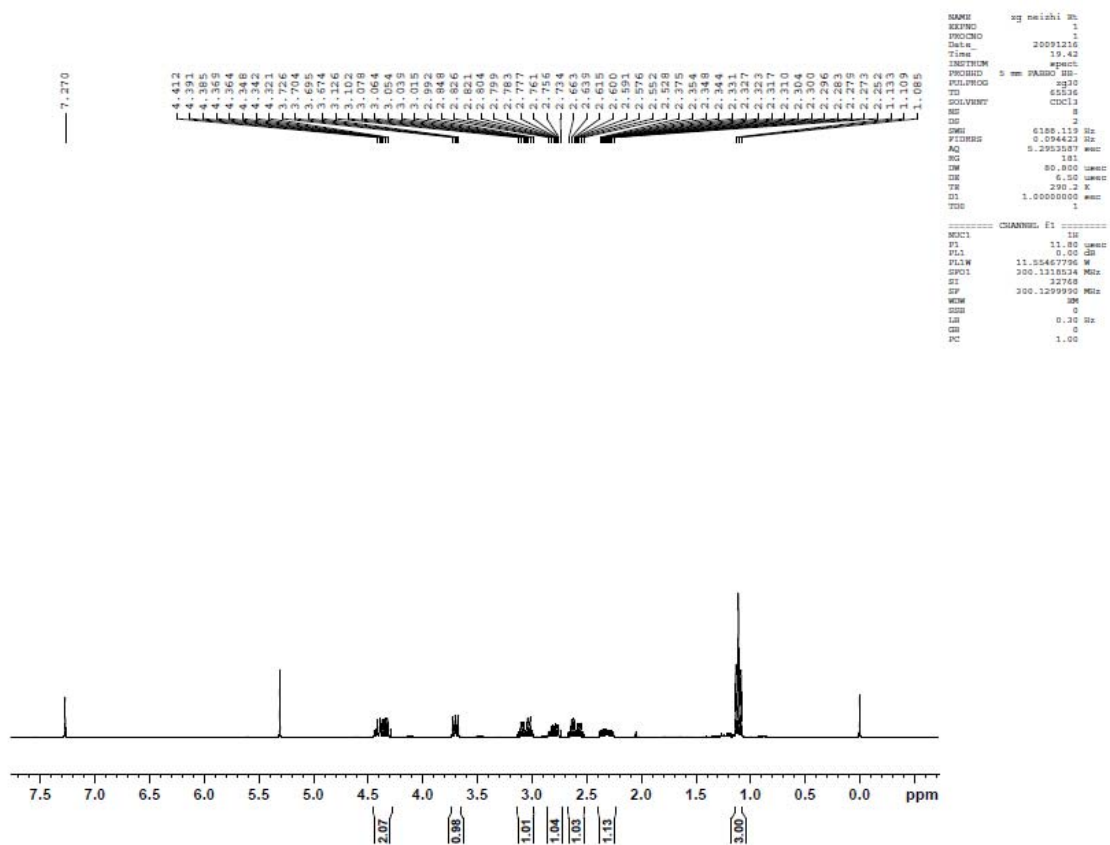

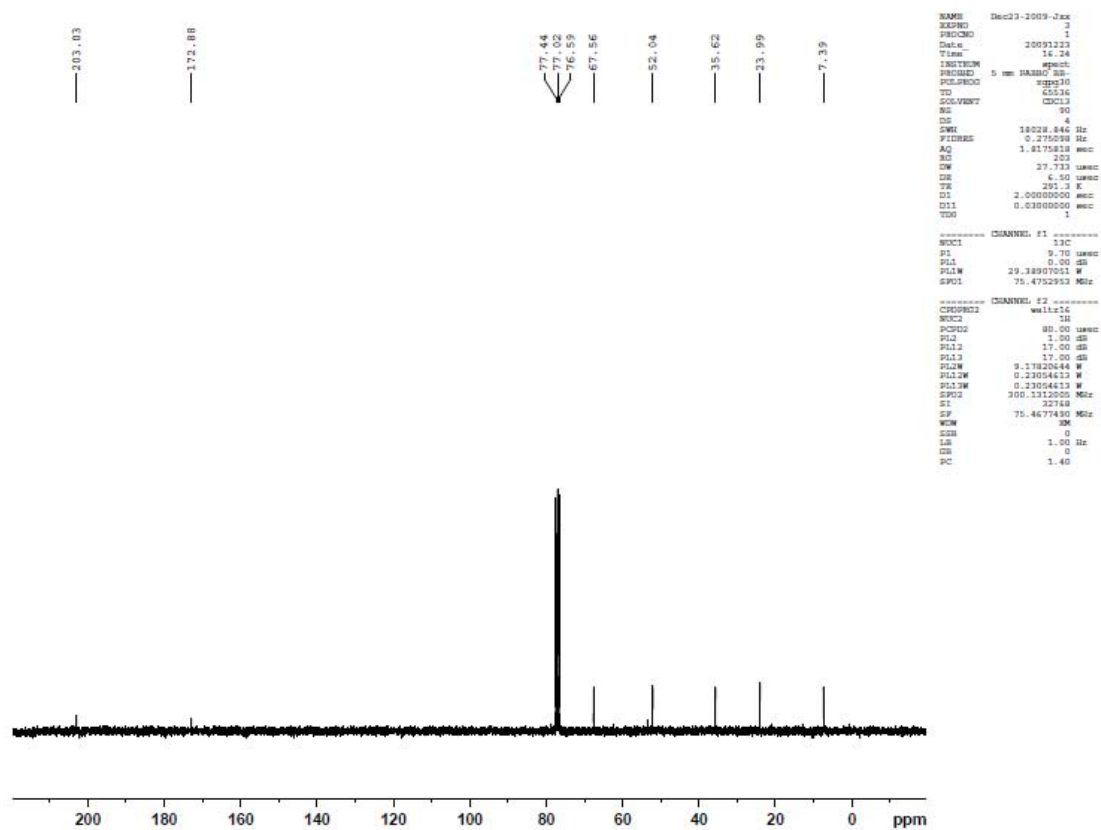

**3a: (S)-ethyl 1-((S)-(tert-butoxycarbonylamino)(phenyl)methyl)-2-oxocyclopentane carboxylate**

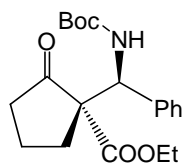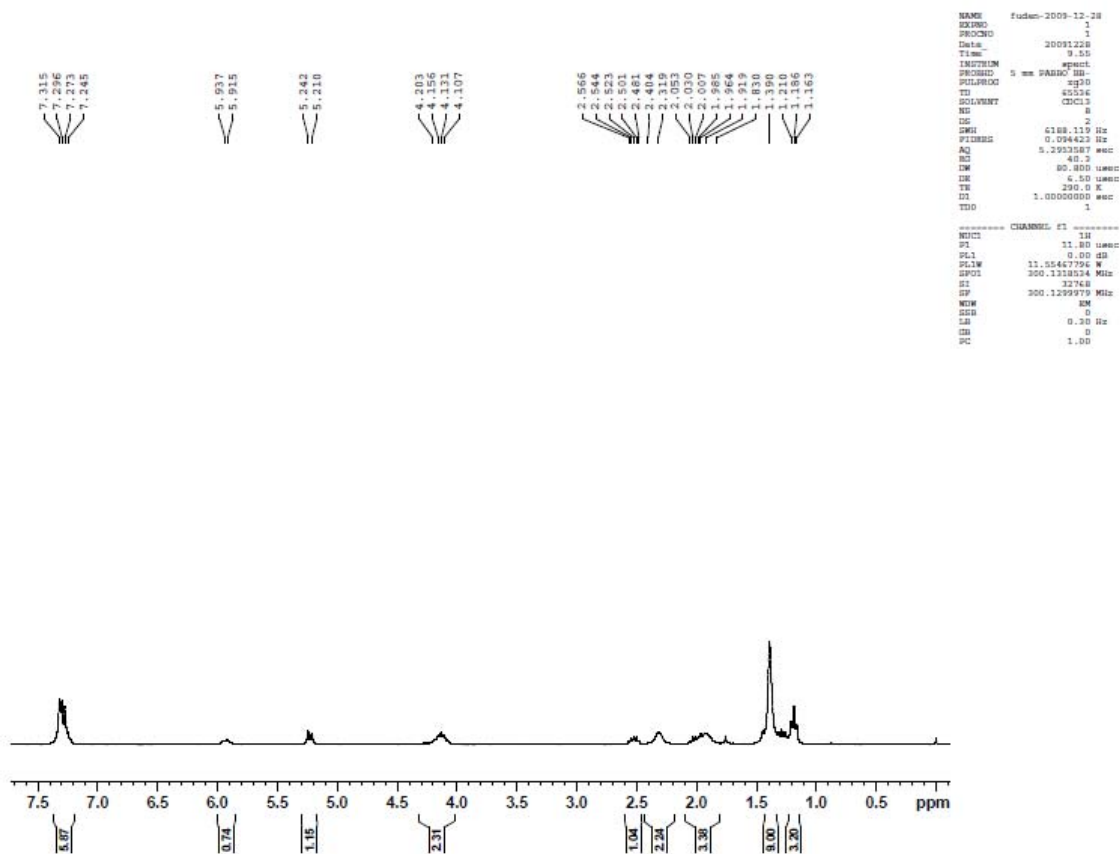

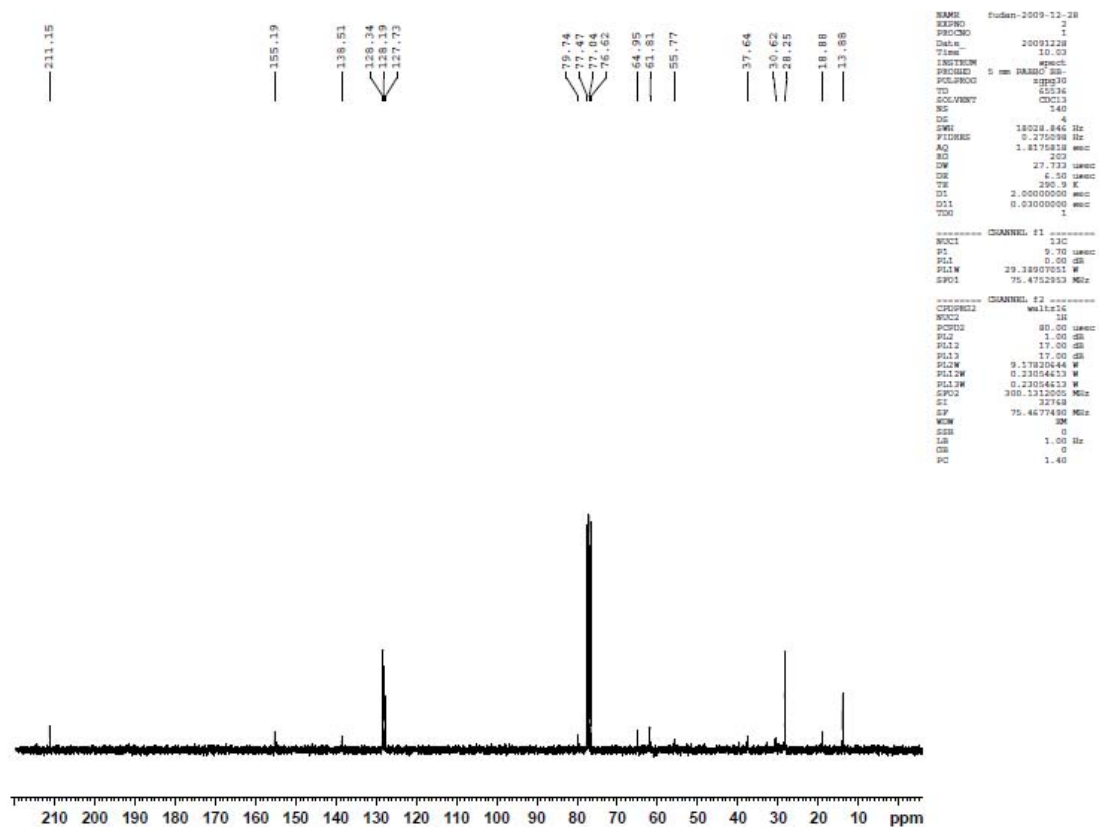

**3b: (S)-ethyl 1-((S)-(tert-butoxycarbonylamino)(naphthalen-1-yl)methyl)-2-oxocyclopentane  
carboxylate**

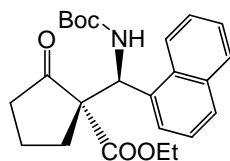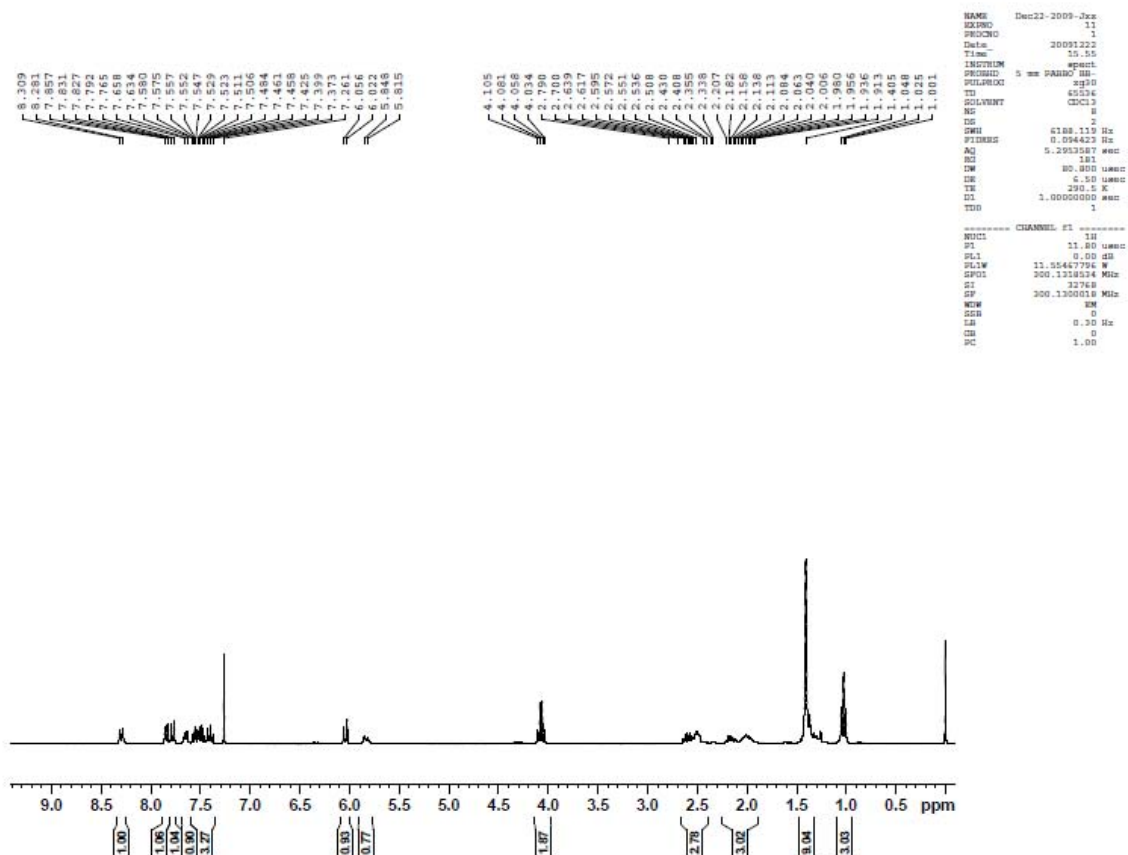

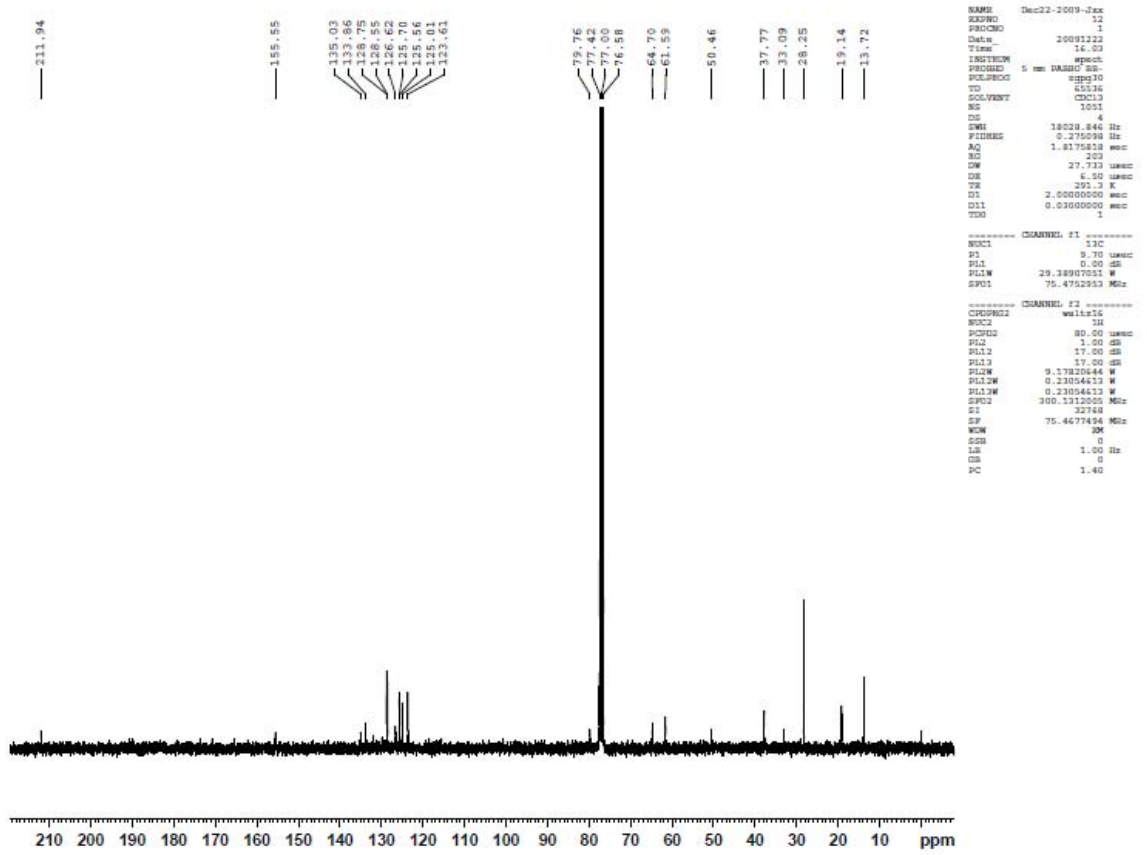



**3c: (S)-ethyl 1-((R)-(tert-butoxycarbonylamino)(2-fluorophenyl)methyl)-2-oxocyclopentane  
carboxylate**

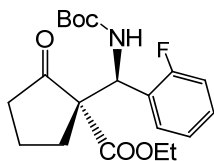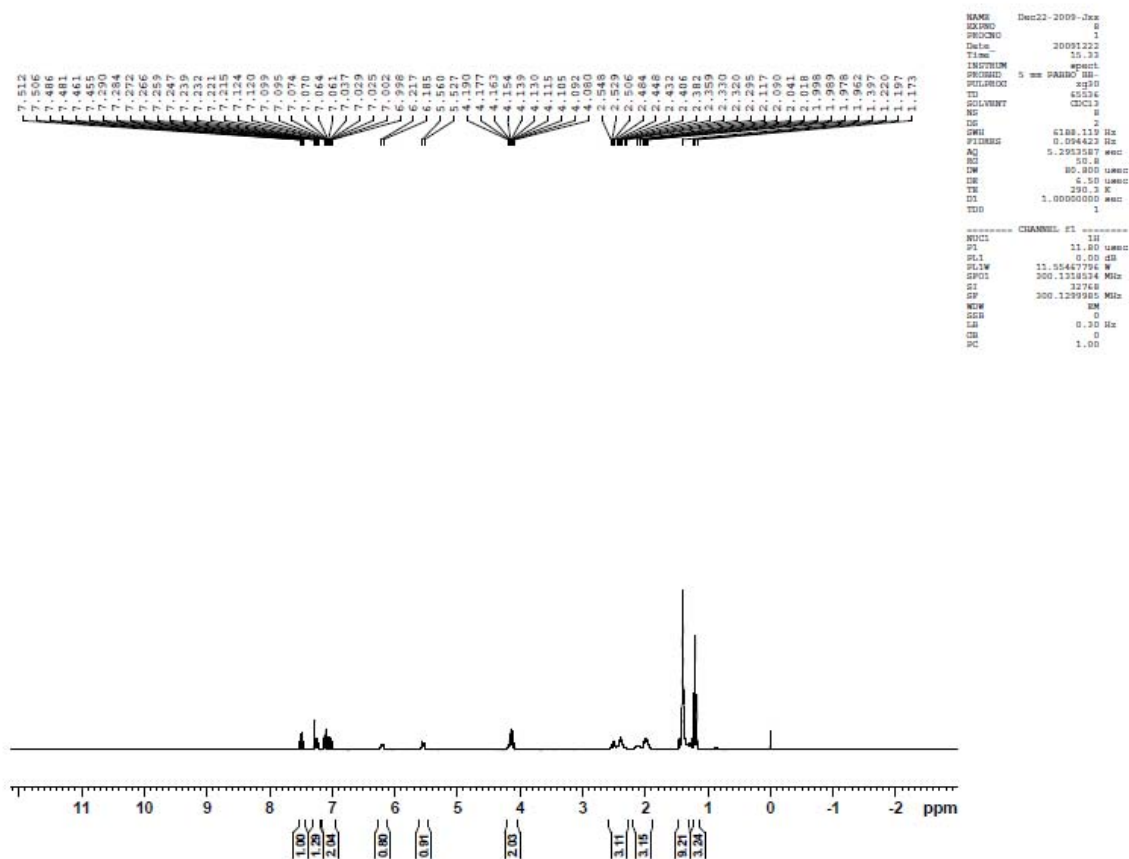

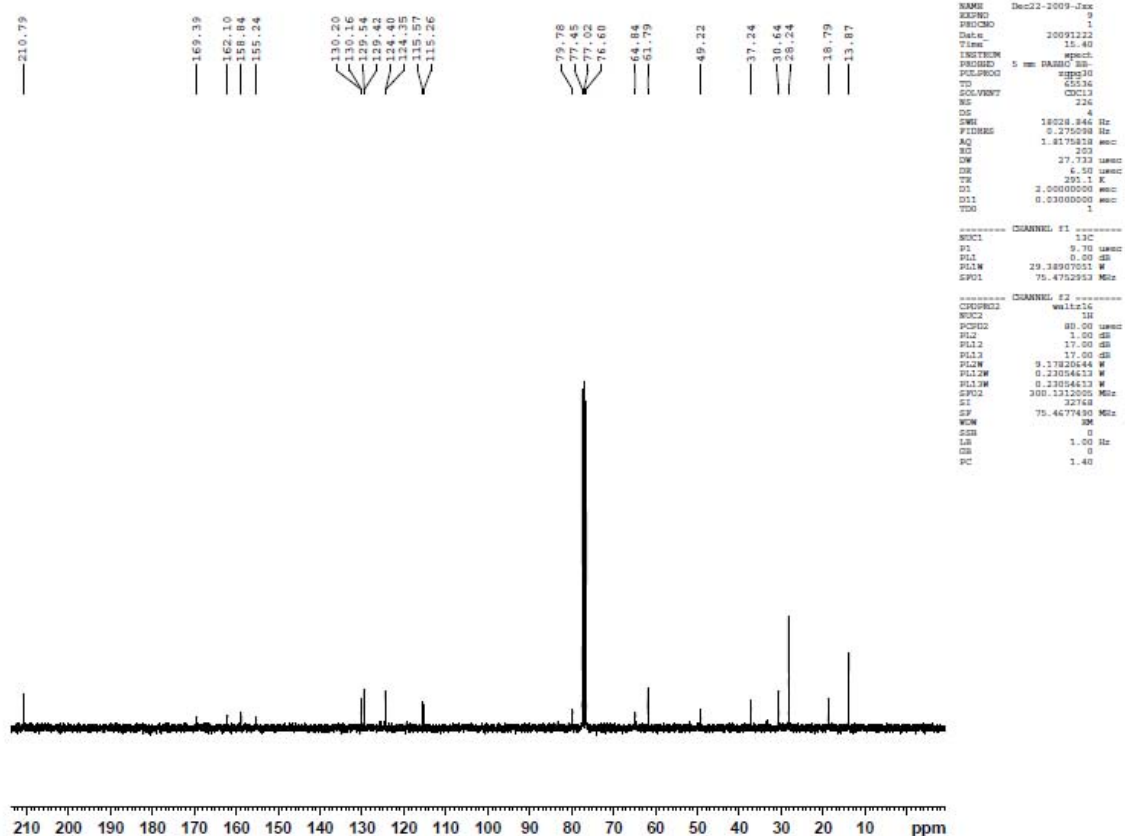

**3d: (S)-ethyl 1-((S)-(tert-butoxycarbonylamino)(3-methoxyphenyl)methyl)-2-oxocyclopentane-3-carboxylate**

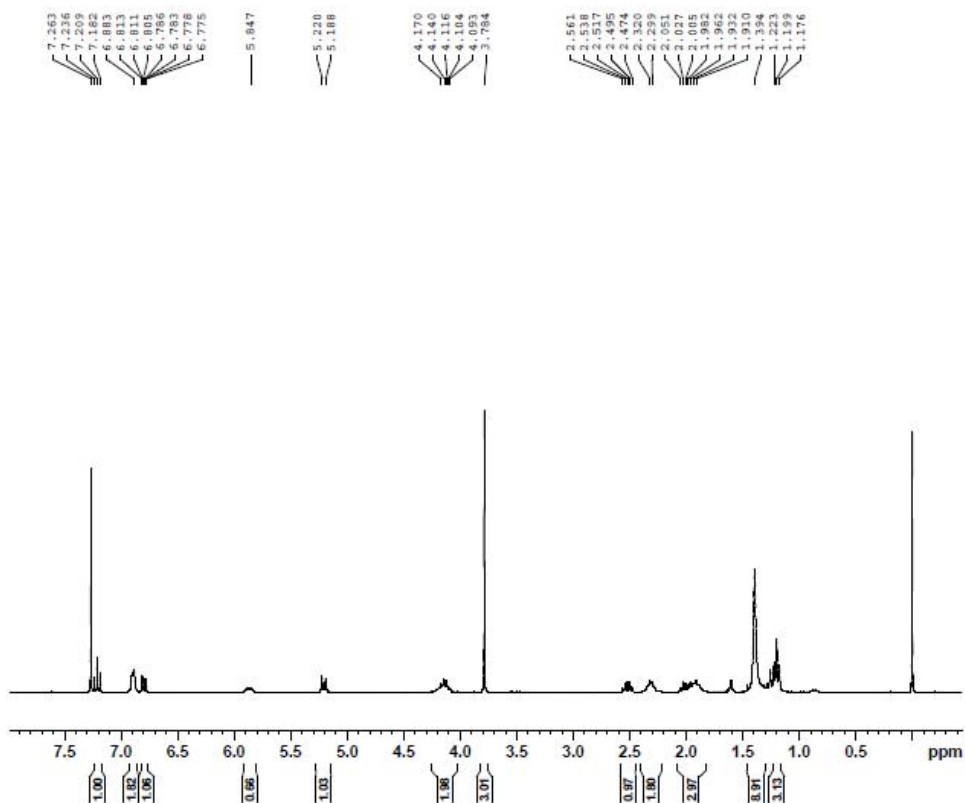

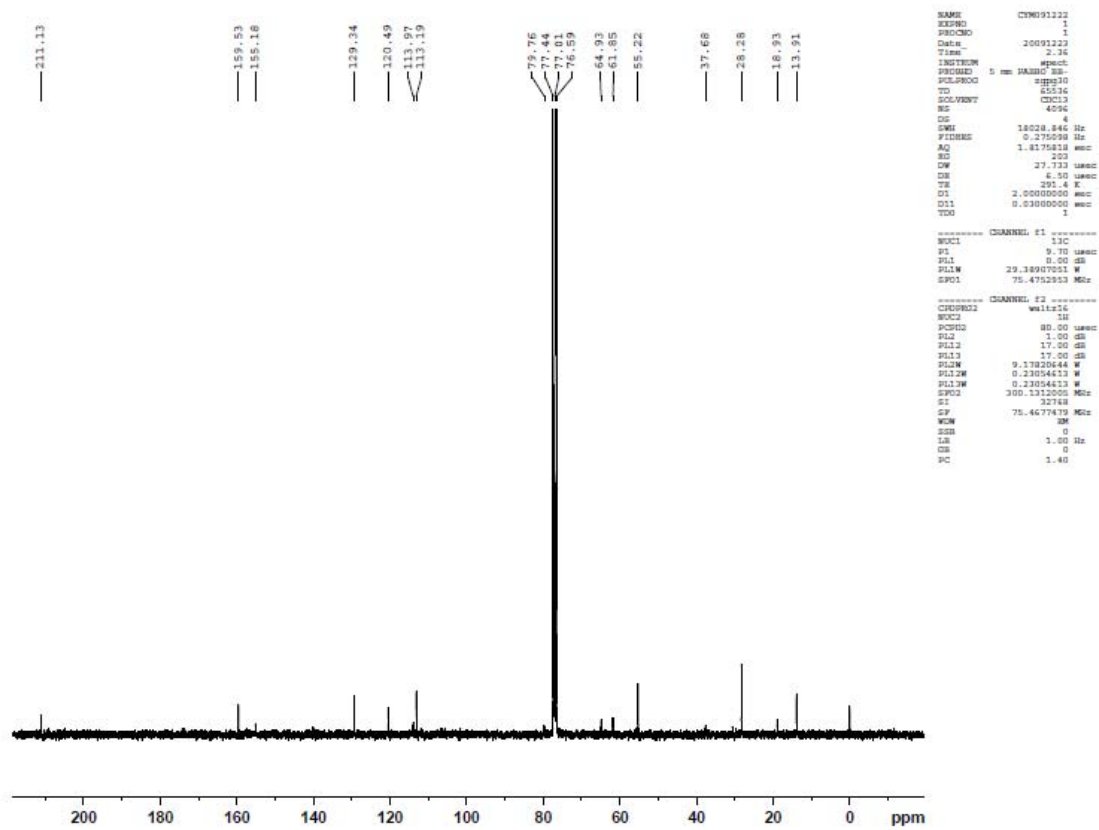

**5a: *tert*-butyl (*S*)-((*R*)-3-acetyl-2-oxotetrahydrofuran-3-yl)(phenyl)methylcarbamate**

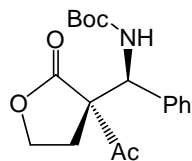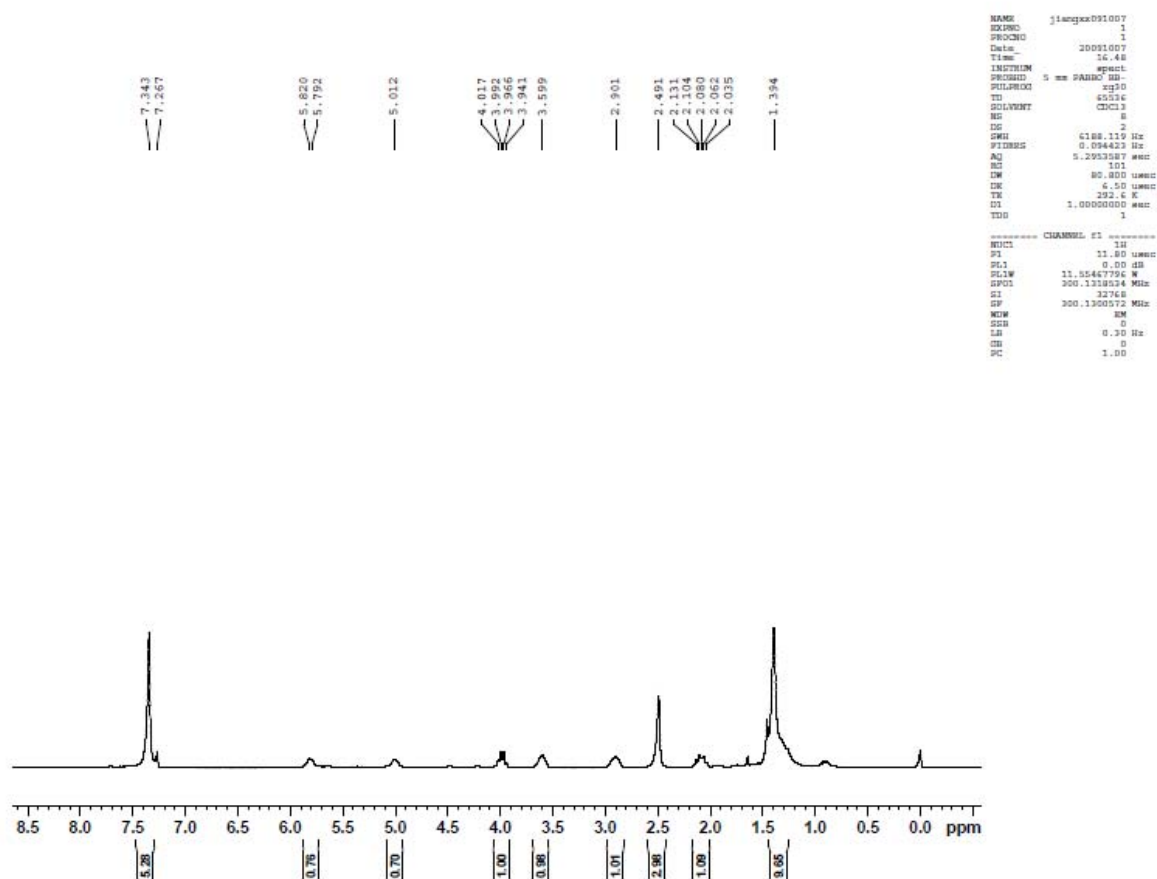

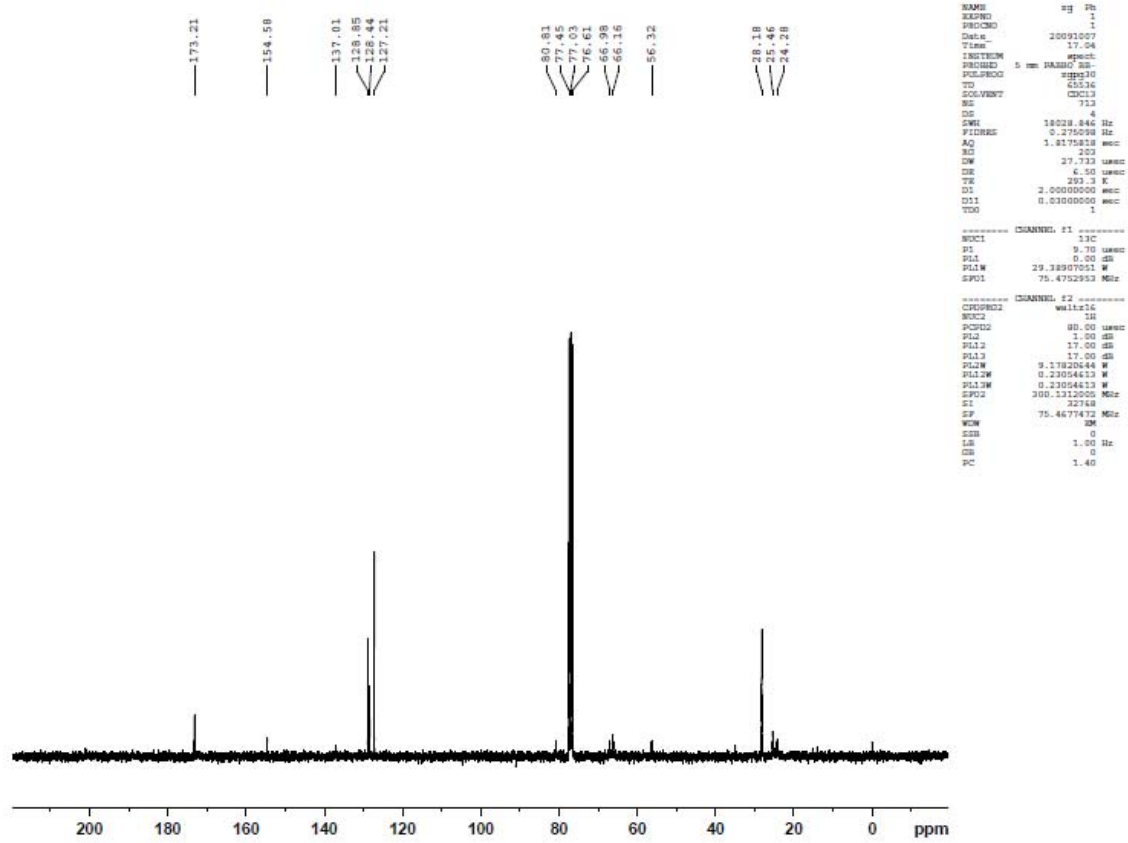

**5b: tert-butyl (S)-((R)-3-acetyl-2-oxotetrahydrofuran-3-yl)(p-tolyl)methylcarbamate**

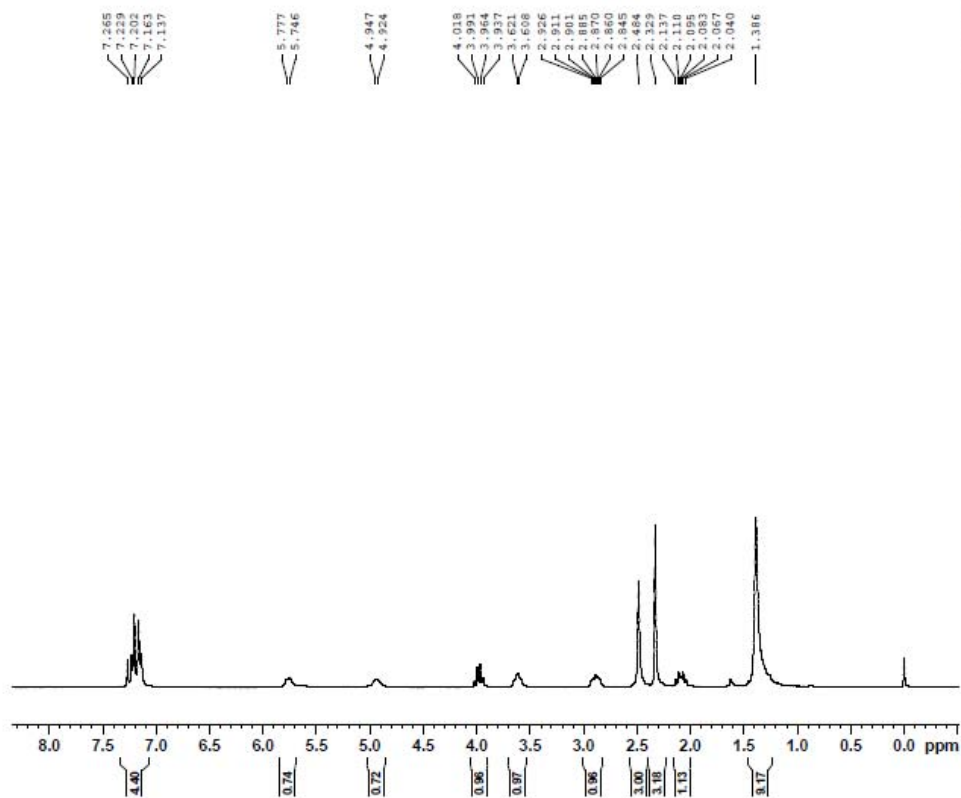

djj

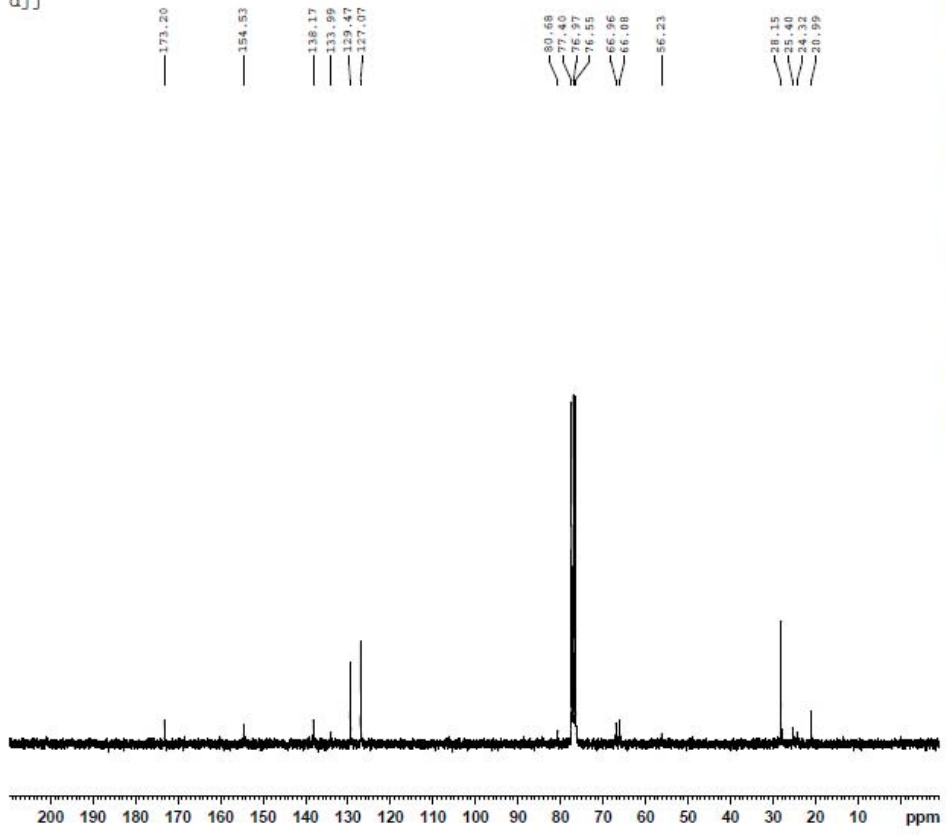

```
NAME      sbyf-20090714
EXPNO    1
PROCNO   1
Date_    20090714
Time     19.27
INSTRUM  spect
PROBHD   5 mm HAMBQ BB-
PULPROG  zgpg30
TD        65536
SOLVENT  CDCl3
NS        1145
DS        4
SWH       18028.840 Hz
FIDRES   0.275098 Hz
AQ        1.8175918 sec
RG        253
DW        27.733 usec
DE        6.50 usec
TE        300.2 K
D1        2.00000000 sec
dD1       0.20000000 sec
TD0       1

----- CHANNEL f1 -----
NUC1      13C
P1        9.70 usec
PL1       0.00 dB
PL12W    29.38007051 W
SFO1      75.47522913 MHz

----- CHANNEL f2 -----
CHPROG2  waltz16
NUC2      1H
PCPD2    80.00 usec
PL2       1.00 dB
PL12     17.00 dB
PL13     17.00 dB
PL12W    0.17820444 W
PL13W    0.22054413 W
SFO2     300.1310000 MHz
SI        32748
SF        75.4677480 MHz
WDW       RM
SSB       0
LB        1.00 Hz
GB        0
PC        1.40
```



**5c: tert-butyl (S)-((R)-3-acetyl-2-oxotetrahydrofuran-3-yl)(o-tolyl)methylcarbamate**

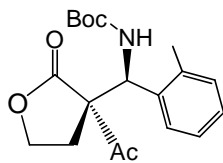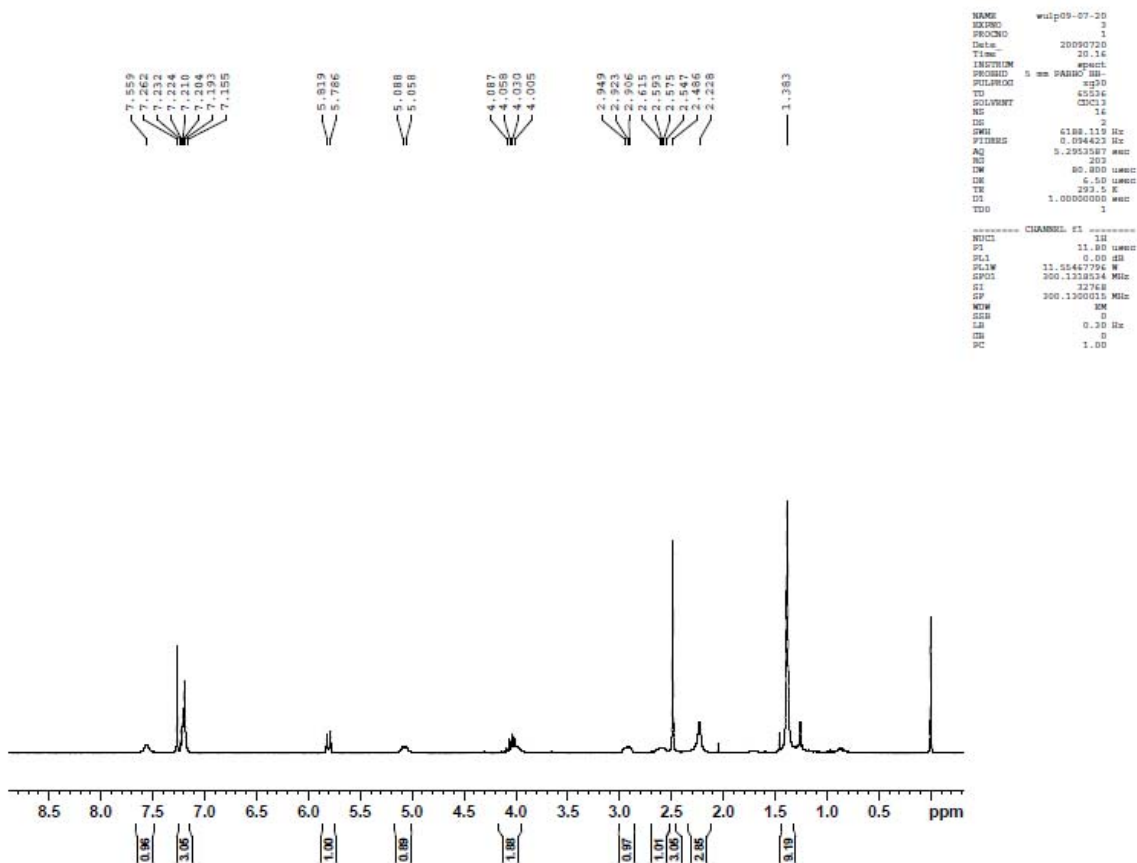

18

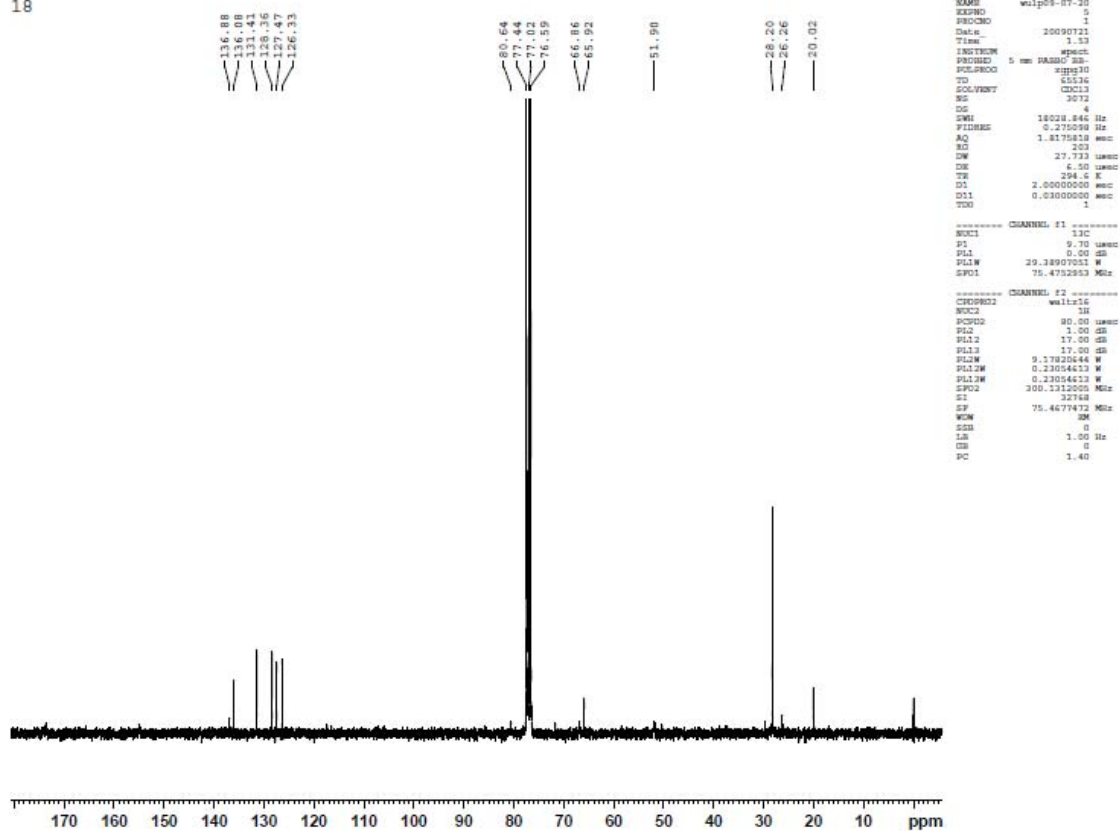

**5d: *tert*-butyl (*S*)-((*R*)-3-acetyl-2-oxotetrahydrofuran-3-yl)(2-methoxyphenyl)methylcarbamate**

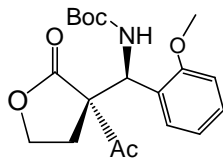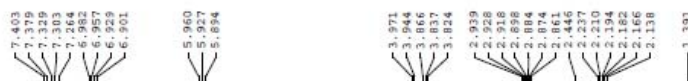

```
NAME          5d 3-Med
EXPNO         1
PROCNO        1
Date_         20091007
Time          9.28
INSTRUM       spect
PROBHD        5 mm PABBO BB-
PULPROG       zgpg
TD            65536
SOLVENT       CDCl3
NS            8
DS            4
SWH           6188.159 Hz
FIDRES       0.094423 Hz
AQ           5.2953587 sec
RG            203
DM            80.800 usec
DE            6.50 usec
TE            292.2 K
D1            1.00000000 sec
TD0           1
----- CHANNEL f1 -----
NUC1          1H
P1            11.80 usec
PL1           0.00 dB
PL12          11.55487784 dB
PL13          200.1218074 MHz
SI            32768
SF            200.1300010 MHz
WDW           EM
SSB           0
LB            0.30 Hz
GB            0
PC            1.00
```

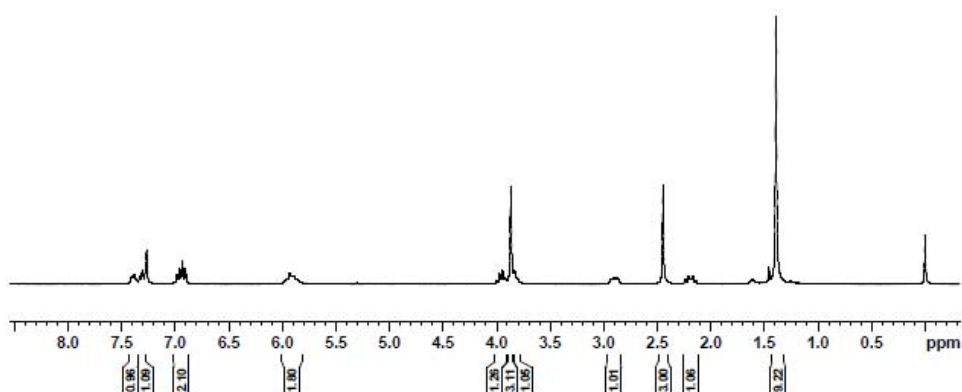

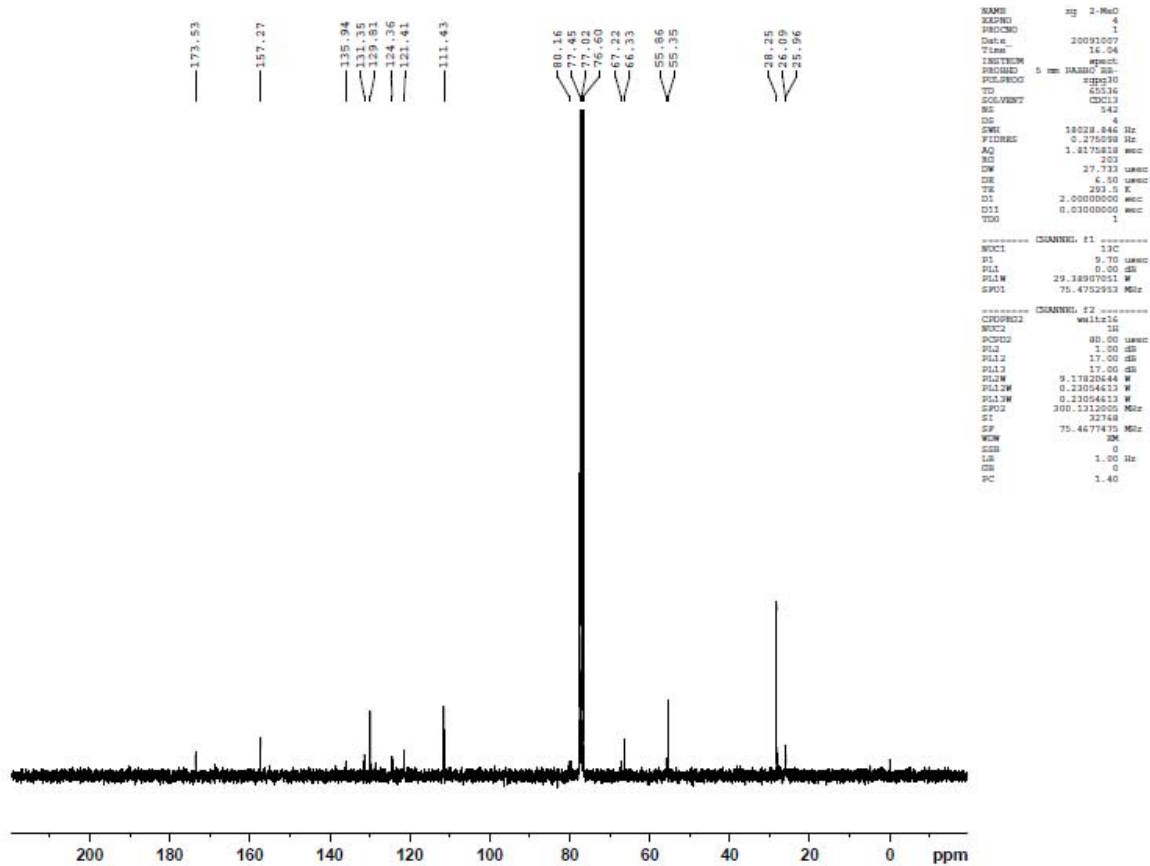

**5e: *tert*-butyl (S)-((R)-3-acetyl-2-oxotetrahydrofuran-3-yl)(3-methoxyphenyl)methylcarbamate**

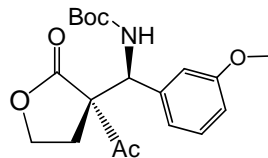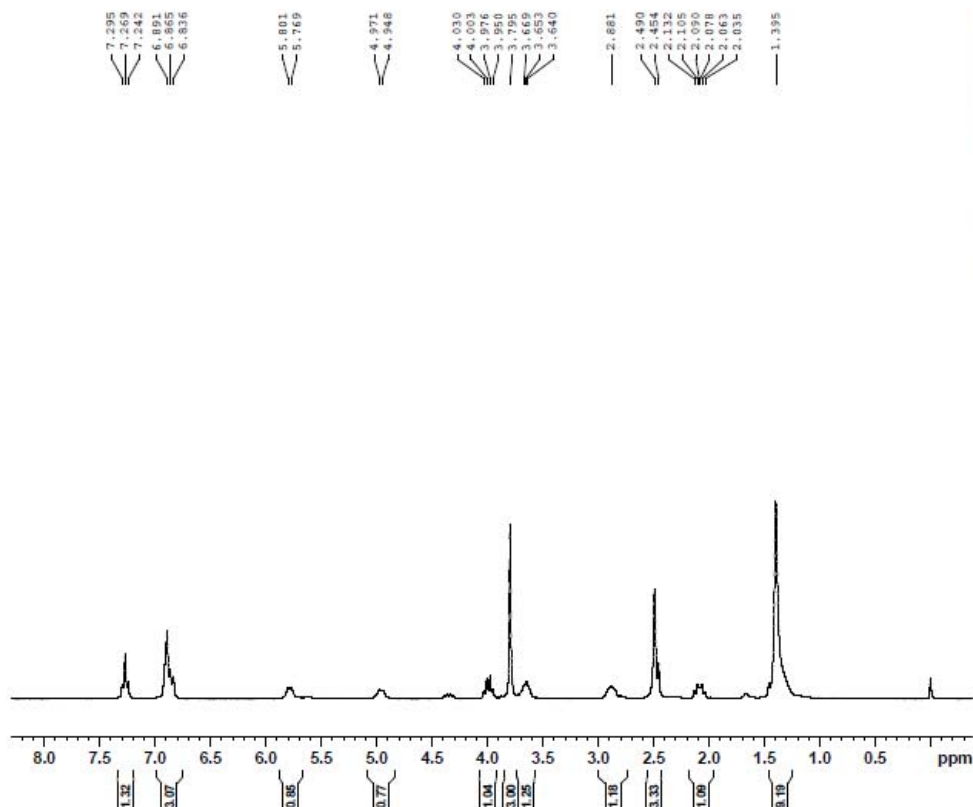

```
NAME      zhyf-20090714
EXPNO    1
PROCNO   1
Date_     20090714
Time      9.25
INSTRUM  spect
PROBHD    5 mm FAIMS QNP
PULPROG  zg30
TD        65536
SOLVENT  CDCl3
NS        16
DS        2
SWH       6188.119 Hz
FIDRES    0.094422 Hz
AQ        5.2953587 sec
RG        64
DM        80.800 usec
DE        6.50 usec
TE        293.2 K
D1        1.00000000 sec
TD0       1
----- CHANNEL f1 -----
NUC1      13
P1        11.80 usec
PL1       0.00 dB
PL12      11.55467796 dB
SFO1      300.1318534 MHz
SI        32768
SF        300.1299990 MHz
WDW       EM
SSB       0
LB        0.30 Hz
GB        0
PC        1.00
```

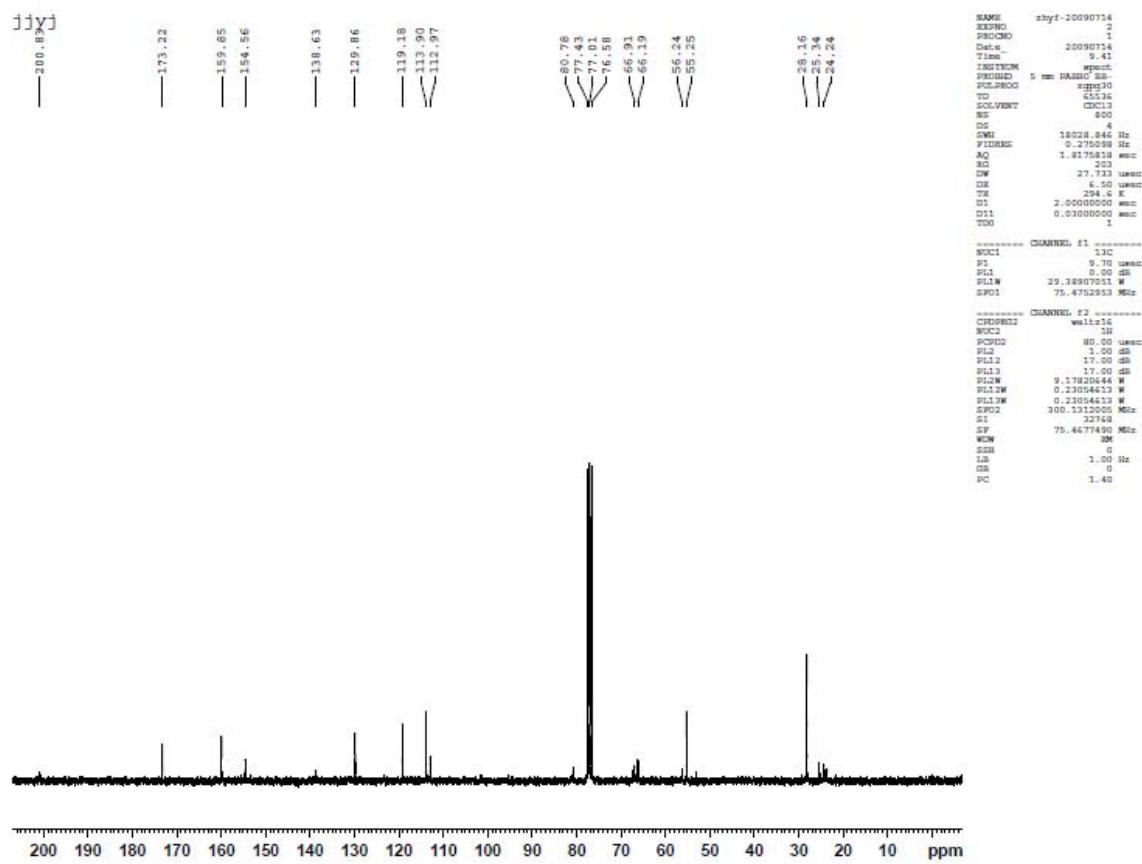

**5f: tert-butyl (S)-((R)-3-acetyl-2-oxotetrahydrofuran-3-yl)(m-tolyl)methylcarbamate**

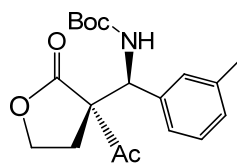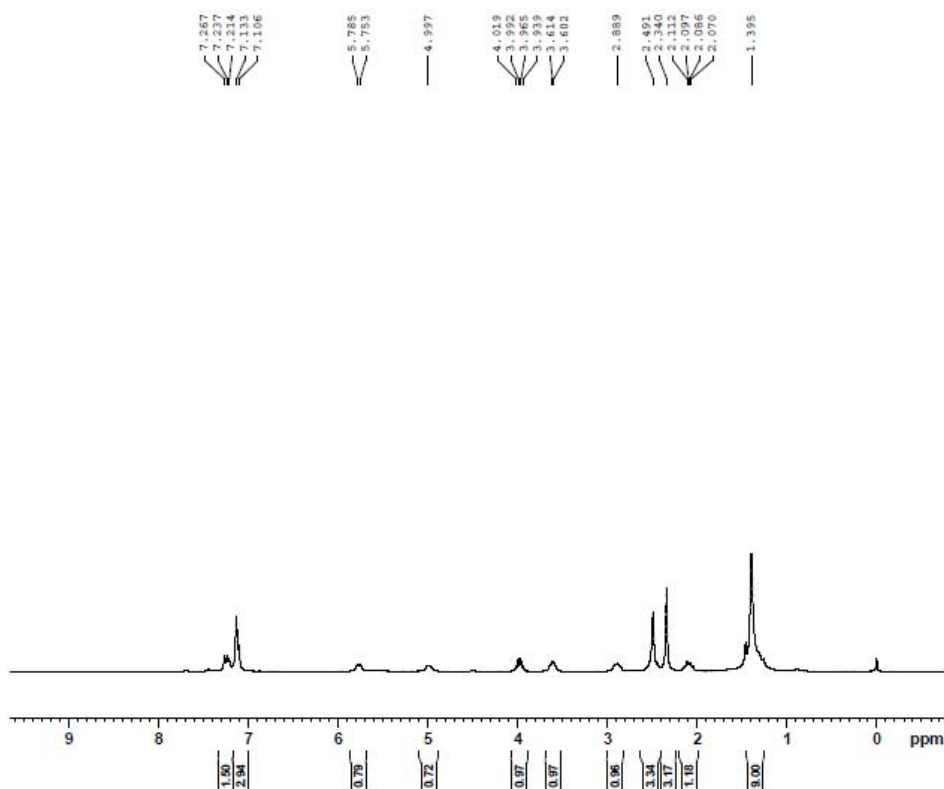

```
NAME      3-Me
EXPNO     1
PROCNO    1
Date_     20010608
Time      15.19
INSTRUM   spect
PROBHD    5 mm QNP1H
PULPROG   zgpg30
TD         65536
SOLVENT   CDCl3
NS         2
DS         2
SWH        6182.119 Hz
F2HETC    0.054423 Hz
AQ         5.2953587 sec
RG         517
DSW        80.800 usec
DE         6.00 usec
TE         292.2 K
D1         1.00000000 sec
TUD        1
----- CHANNEL f1 -----
NUC1       1H
P1         11.00 usec
PL1        0.00 dB
PL1W       11.55447796 W
SFO1       300.1358214 MHz
F2         327.68
SF         300.1299993 MHz
WDM        DM
SGB         0
LH         0.30 Hz
GB         0
PC         1.00
```

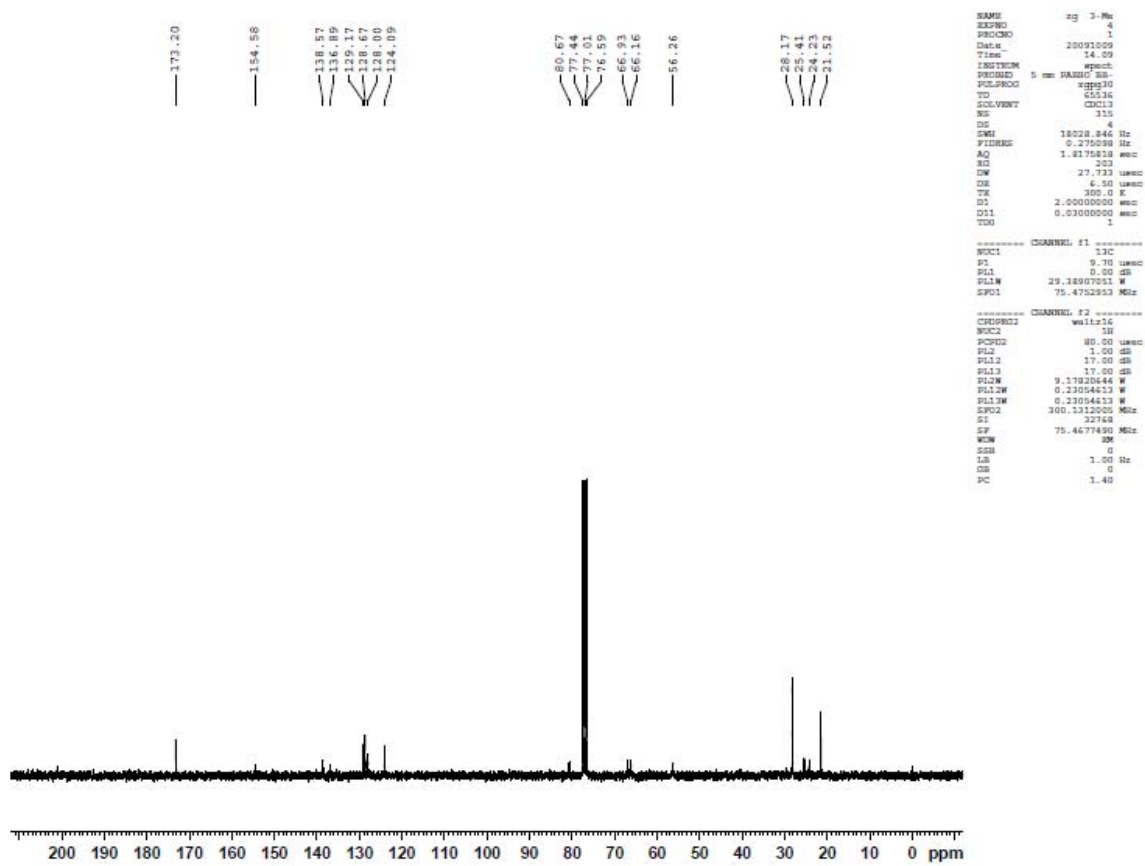



**5g: *tert*-butyl (*R*)-((*R*)-3-acetyl-2-oxotetrahydrofuran-3-yl)(2-bromophenyl)methylcarbamate**

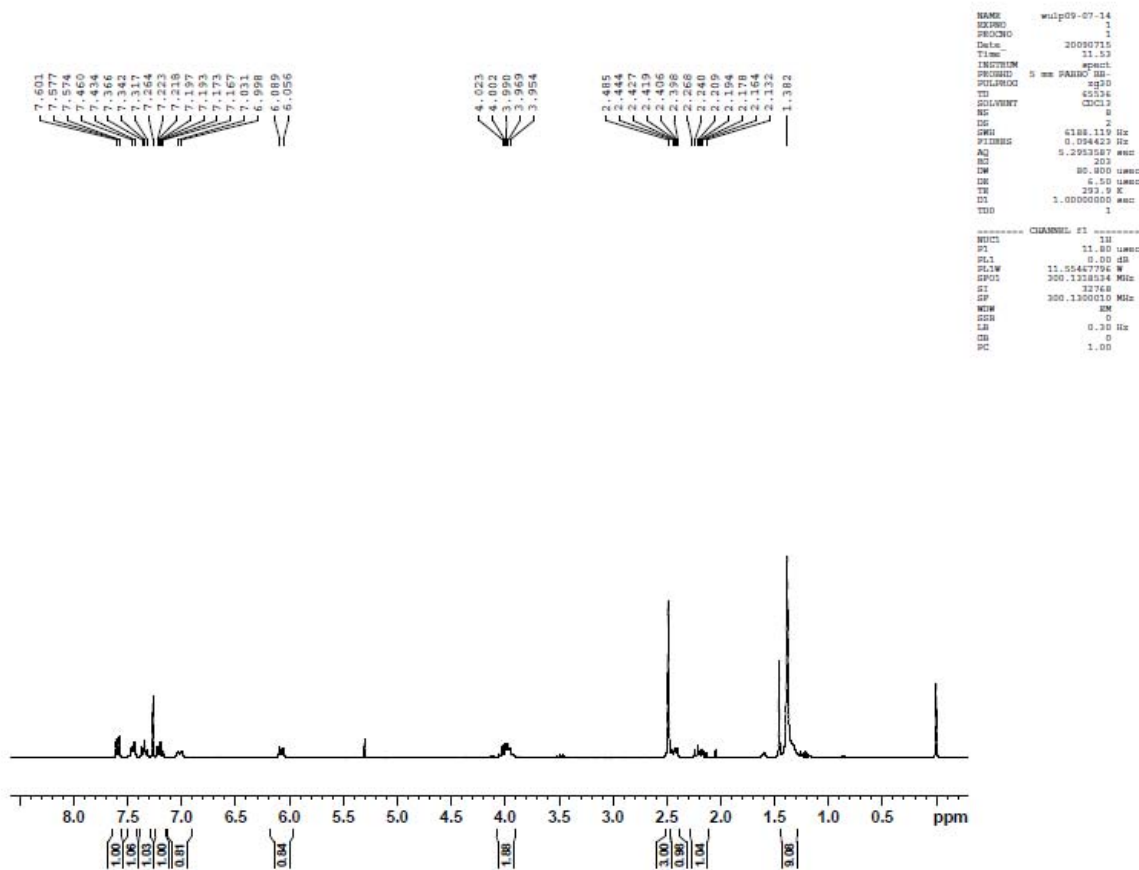

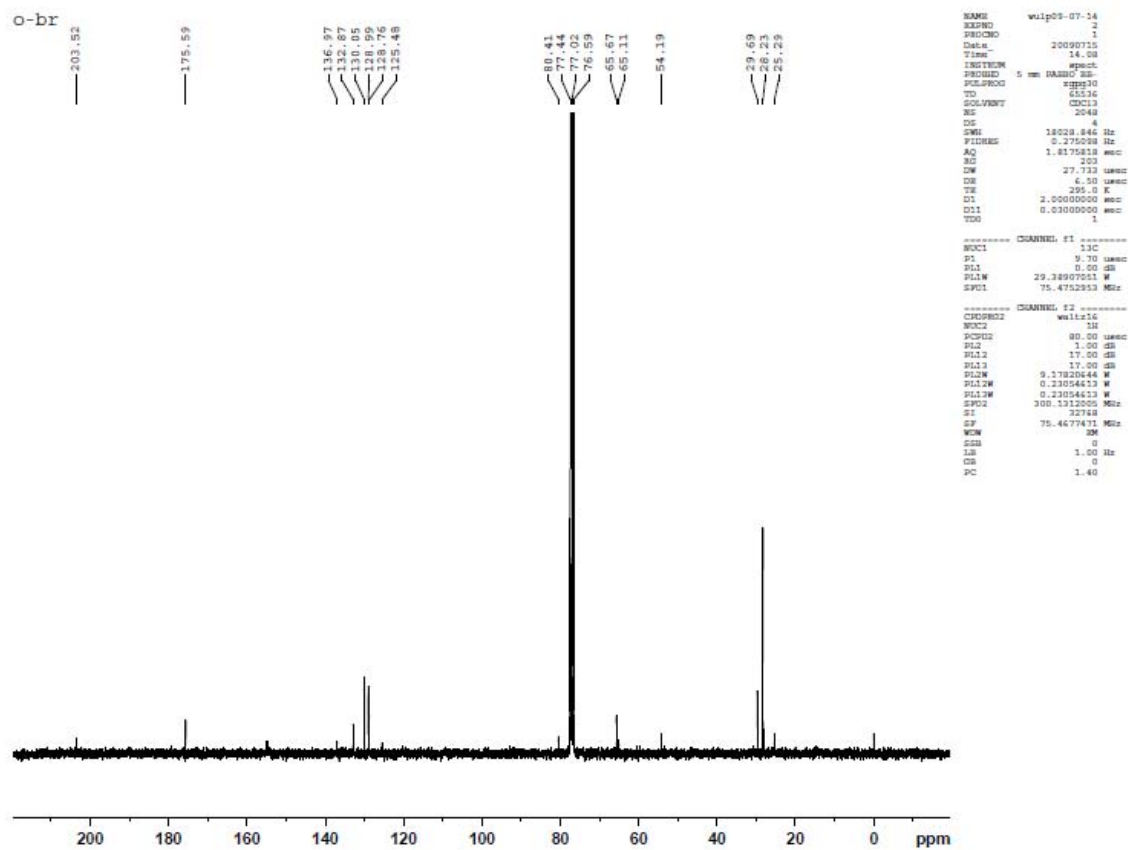

**5h: tert-butyl (R)-((R)-3-acetyl-2-oxotetrahydrofuran-3-yl)(2-fluorophenyl)methylcarbamate**

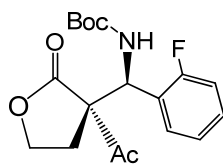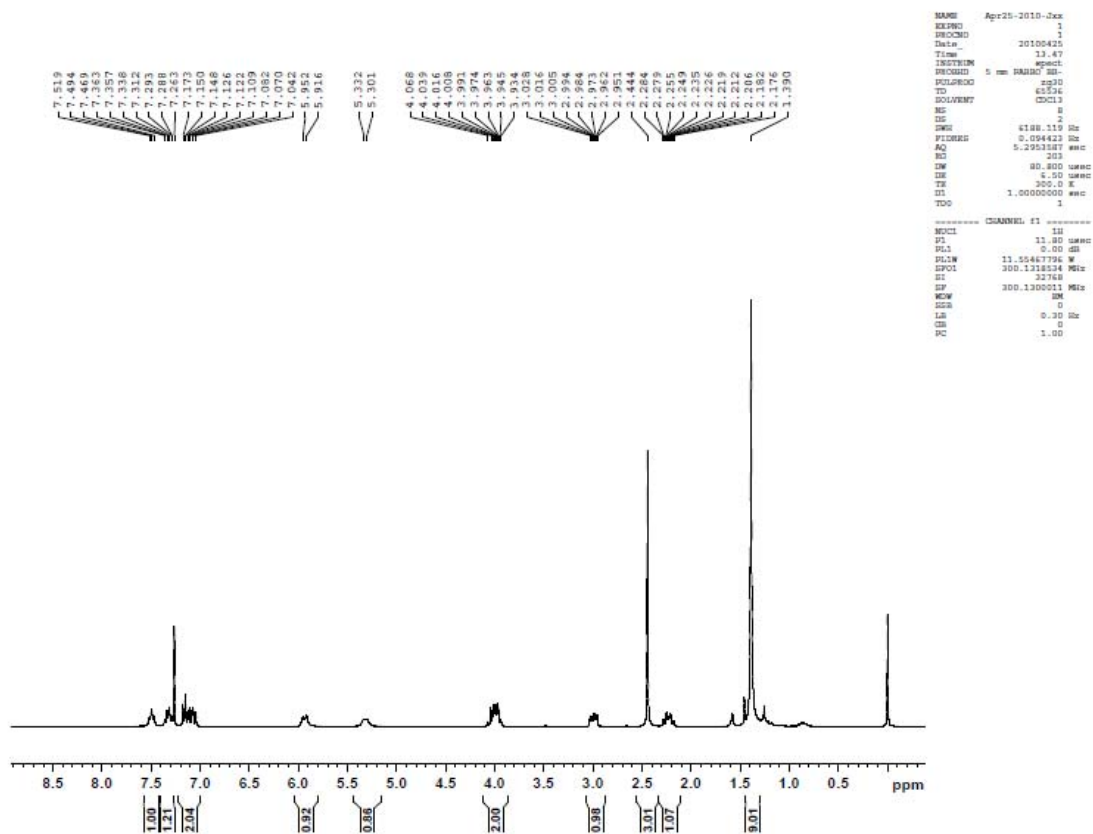

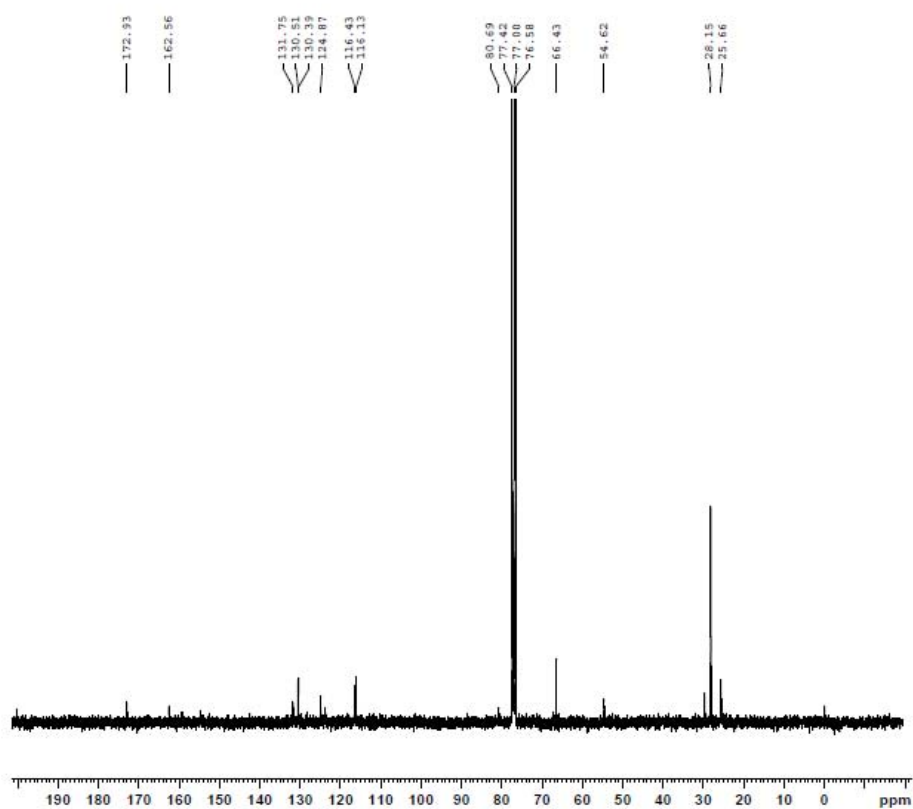

```
NAME Apr25-2010-2xx
EXPNO 5
PROCNO 5
Date_ 20100425
Time 15.55
INSTRUM spect
PROBHD 5 mm PABBO HD
PULPROG zgpg30
TD 13136
SOLVENT CDCl3
RG 673
AQ 1.8575818 sec
RG 201
AQ 0.273098 Hz
RG 27.133 usec
RG 6.59 usec
TE 300.2 K
D1 2.0000000 sec
D11 0.0300000 sec
D15 5
----- CHANNEL f1 -----
NUC1 13C
P1 9.70 usec
PL1 0.00 dB
PL12W 29.3897051 W
RF1 75.4812913 MHz
----- CHANNEL f2 -----
CPDPRG2 waltz16
NUC2 1H
PCPD2 80.00 usec
PL2 1.00 dB
PL12 17.00 dB
PL13 17.00 dB
PL12W 9.17820444 W
PL13W 0.23054613 W
PL13W 0.23054613 W
RF12 500.1312003 MHz
SI 32768
SF 75.4877490 MHz
WDW EM
SSB 0
LB 1.00 Hz
GB 0
PC 1.40
```

5i: *tert*-butyl (*S*)-((*R*)-3-acetyl-2-oxotetrahydrofuran-3-yl)(4-chlorophenyl)methylcarbamate

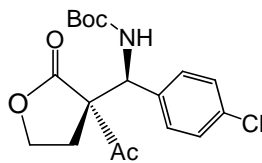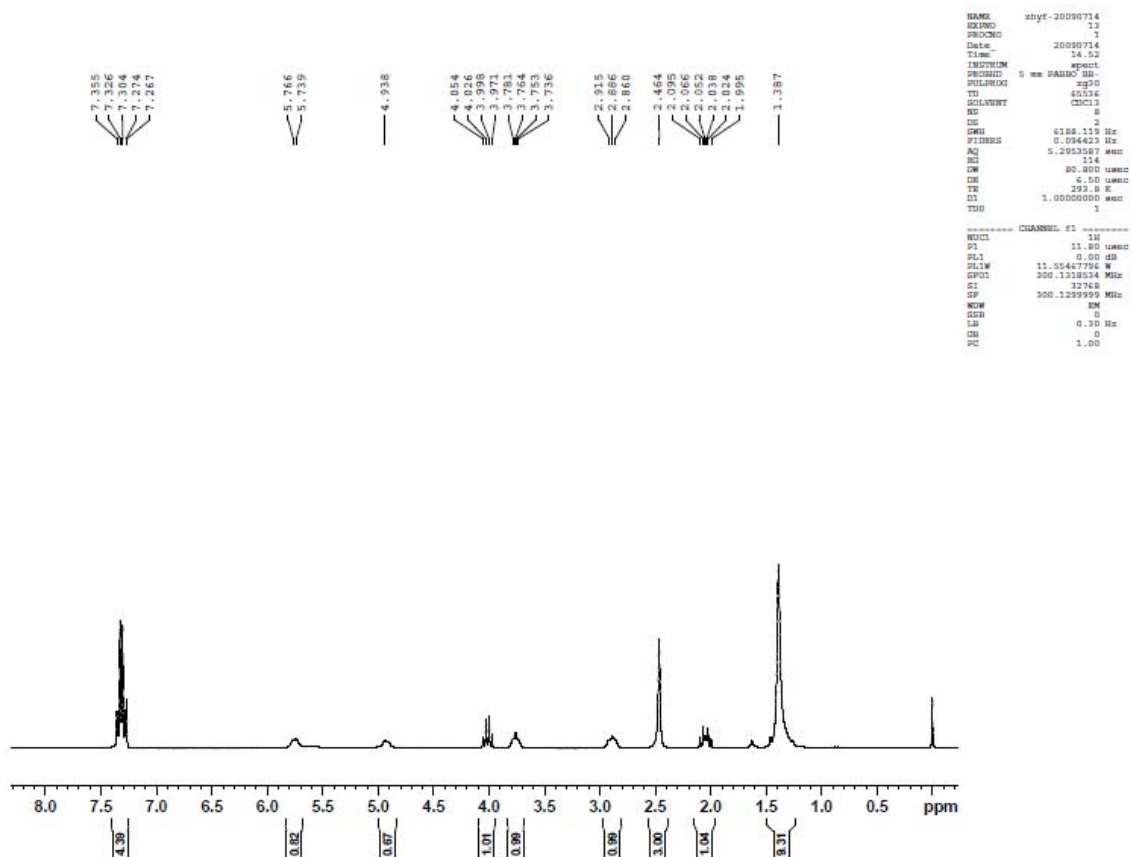

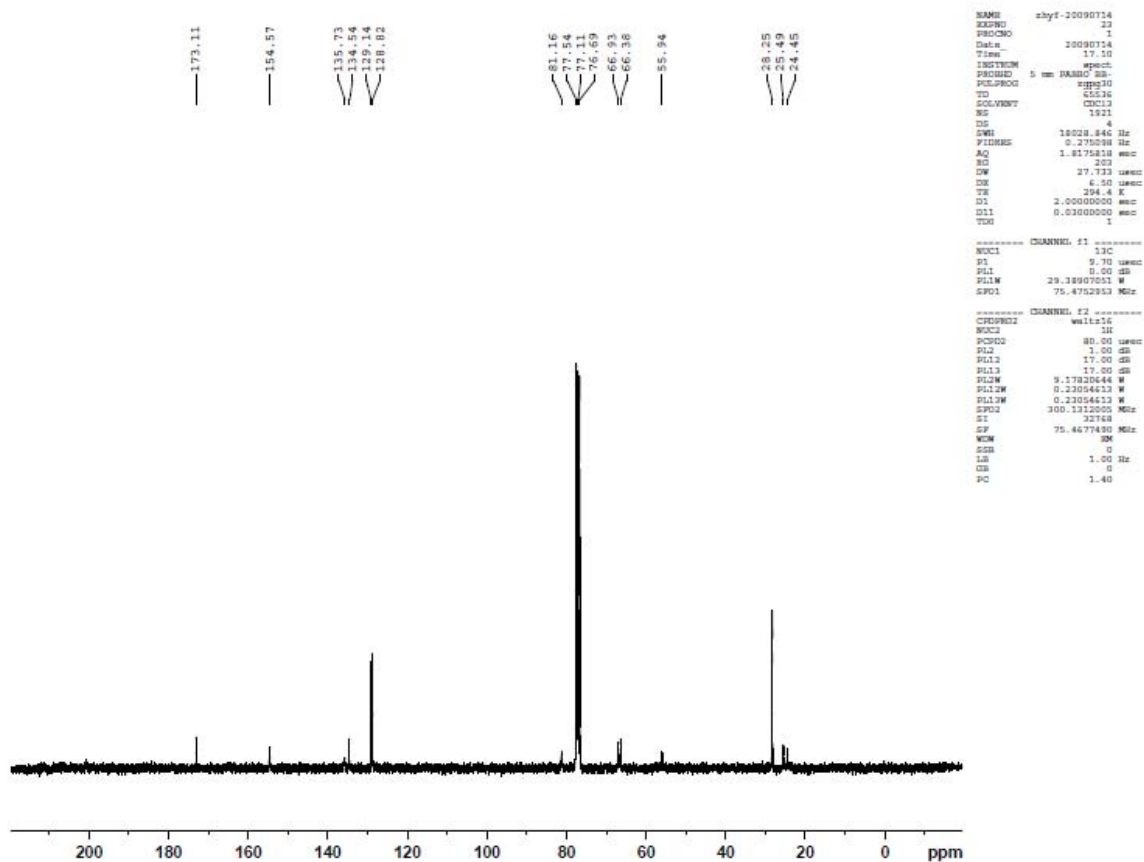

**5j: tert-butyl (R)-((R)-3-acetyl-2-oxotetrahydrofuran-3-yl)(thiophen-2-yl)methylcarbamate**

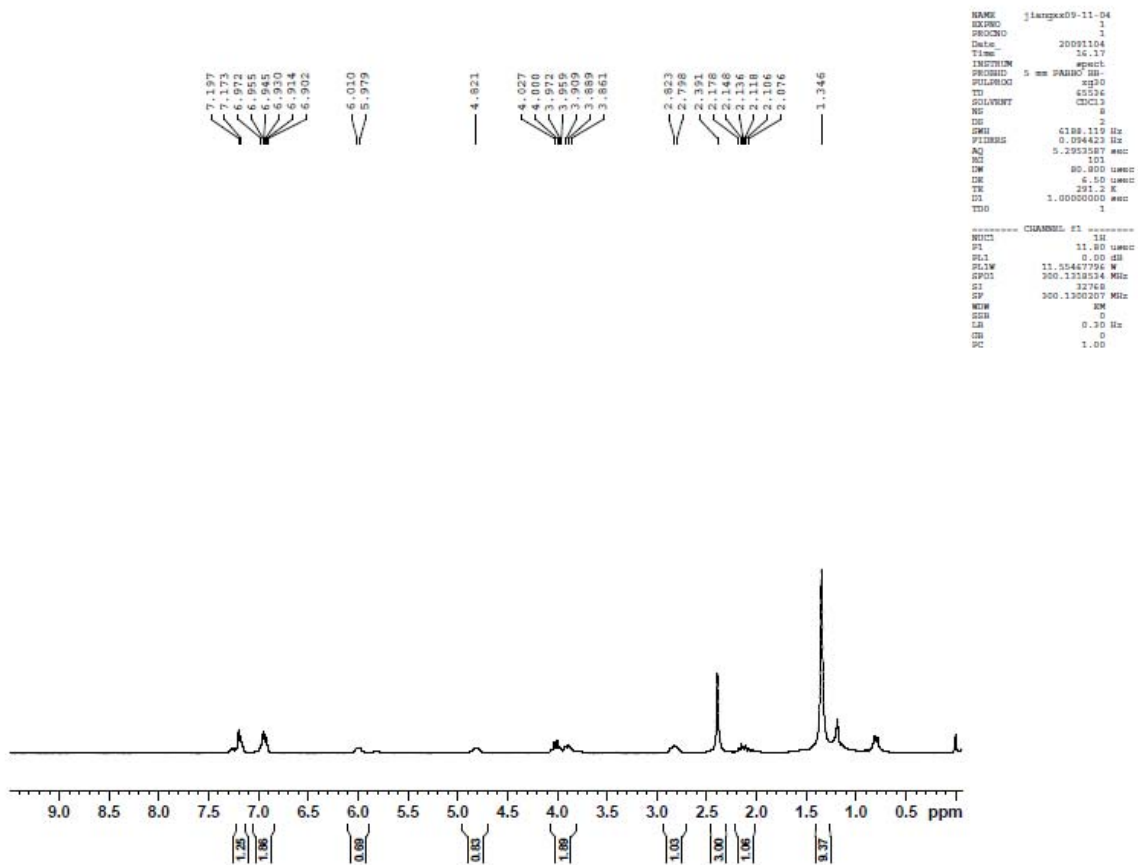

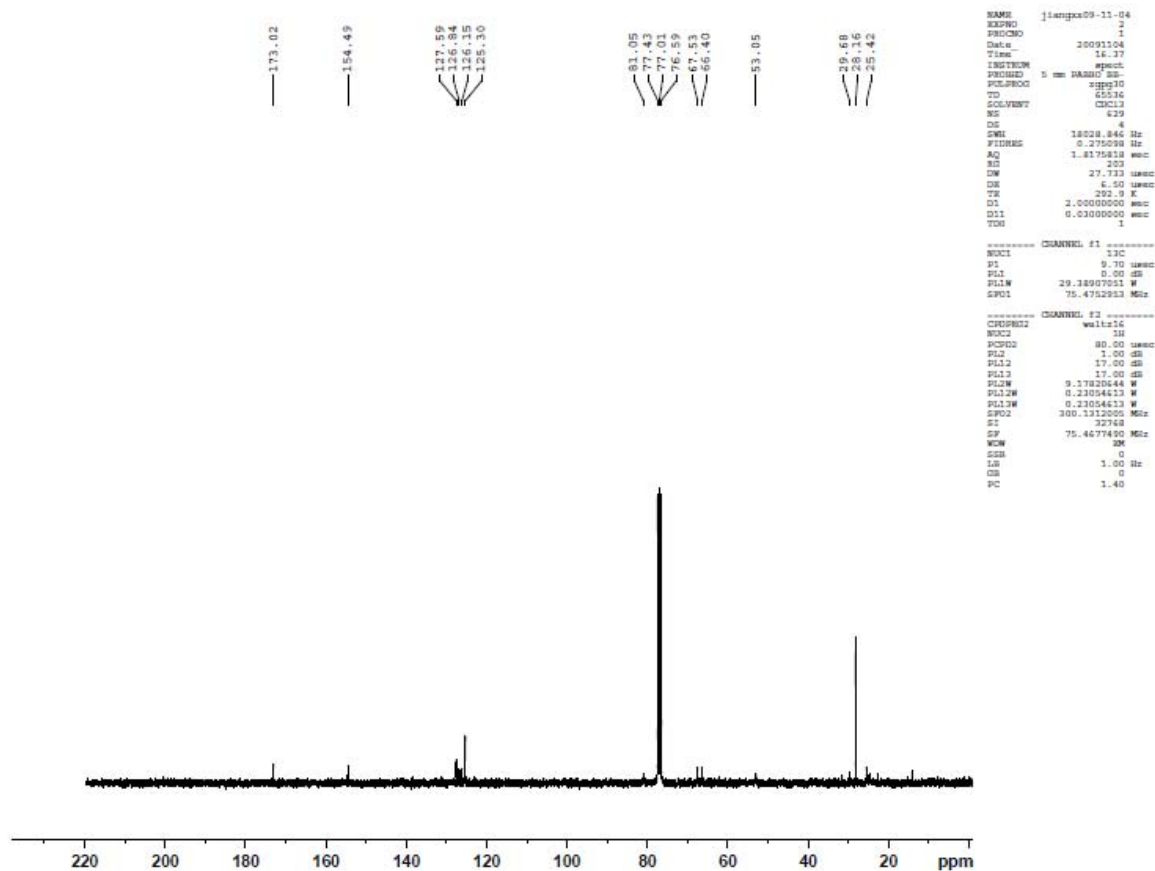



**5k: *tert*-butyl (*S*)-((*R*)-3-acetyl-2-oxotetrahydrofuran-3-yl)(furan-3-yl)methylcarbamate**

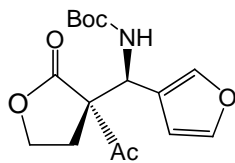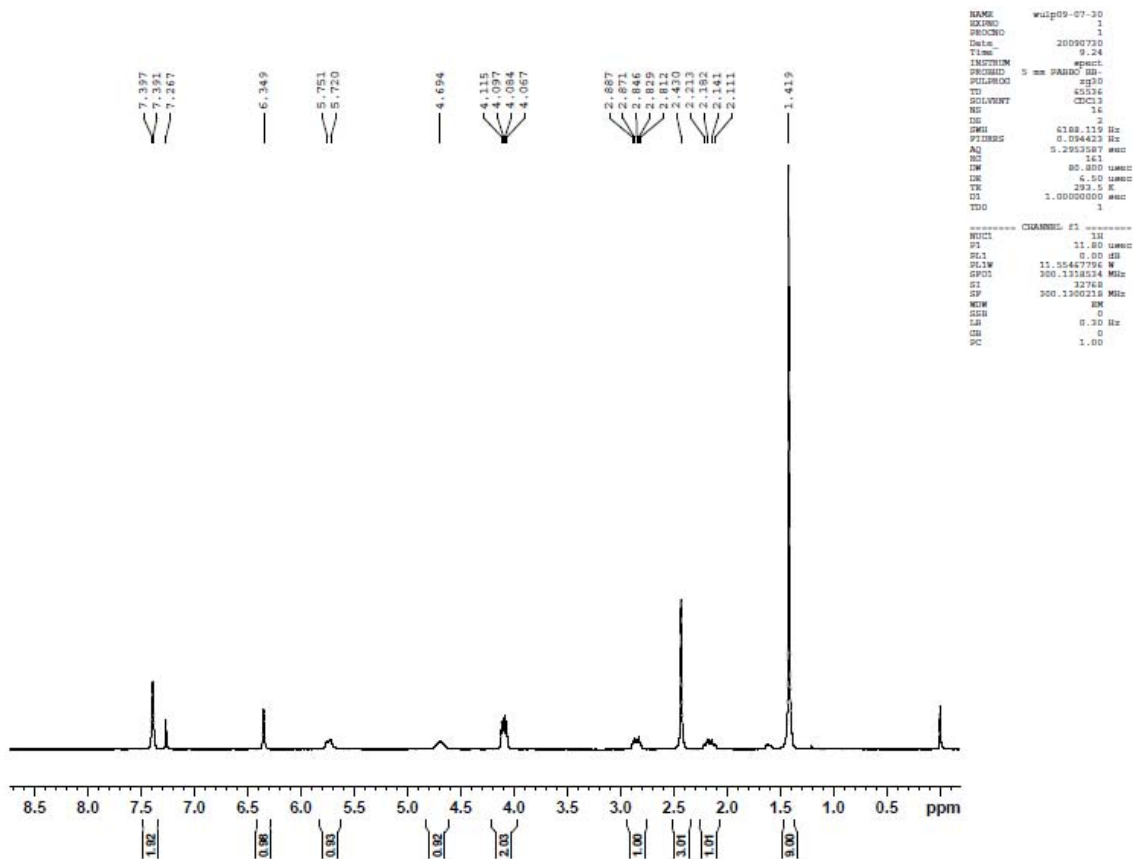

3-furyl

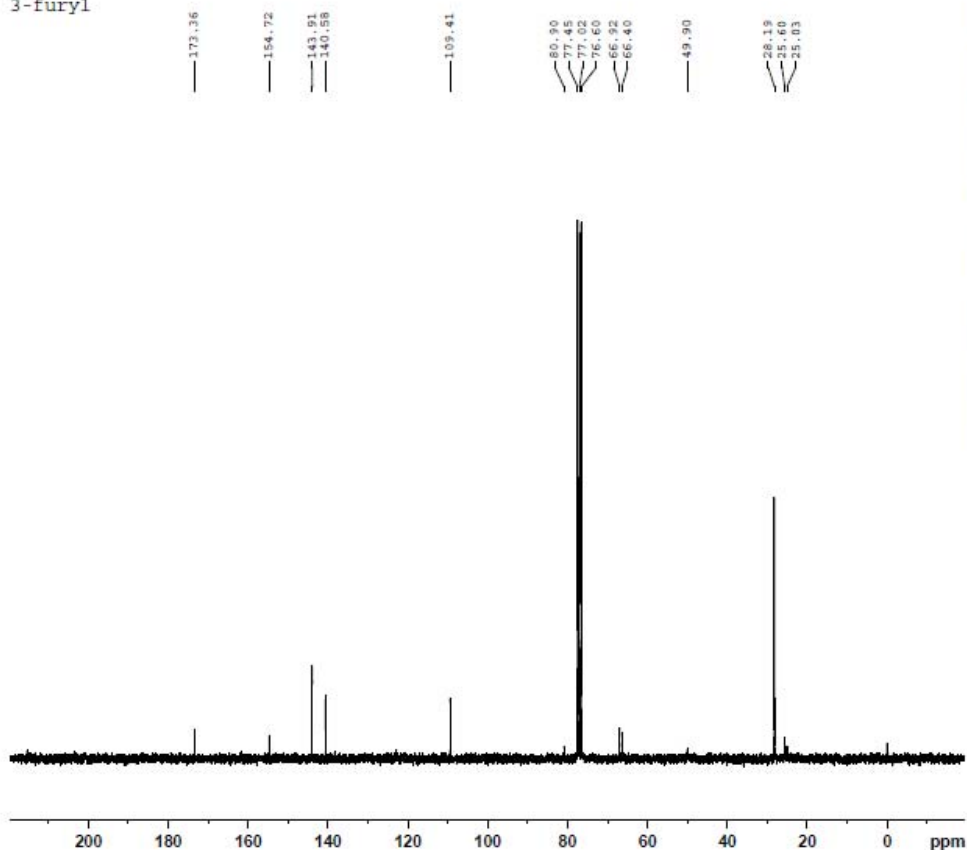

```
NAME wlp09-07-10
EXPNO 1
PROCNO 1
Date_ 20090710
Time 9.12
INSTRUM spect
PROBHD 5 mm HARRP BBO
PULPROG zgpg30
TD 65536
SOLVENT CDCl3
NS 1024
DS 4
SWH 18028.846 Hz
FIDRES 0.275028 Hz
AQ 1.8175118 sec
RG 203
DM 27.713 usec
DE 6.50 usec
TE 294.2 K
D1 2.0000000 sec
D11 0.0300000 sec
TD0 1

===== CHANNEL f1 =====
NUC1 13C
P1 9.70 usec
PL1 0.00 dB
PL1W 29.3490703 W
SFO1 75.4752953 MHz

===== CHANNEL f2 =====
CPDPRG2 waltz16
NUC2 1H
PCPD2 80.00 usec
PL2 1.00 dB
PL12 17.00 dB
PL13 17.00 dB
PL2W 9.17820644 W
PL12W 0.23054413 W
PL13W 0.23054413 W
SFO2 300.131000 MHz
SI 32768
SF 75.4677518 MHz
WDW EM
GB 0
GB 0
GB 0
PC 1.40
```

**6a: tert-butyl (S)-((R)-3-benzoyl-2-oxotetrahydrofuran-3-yl)(phenyl)methylcarbamate**

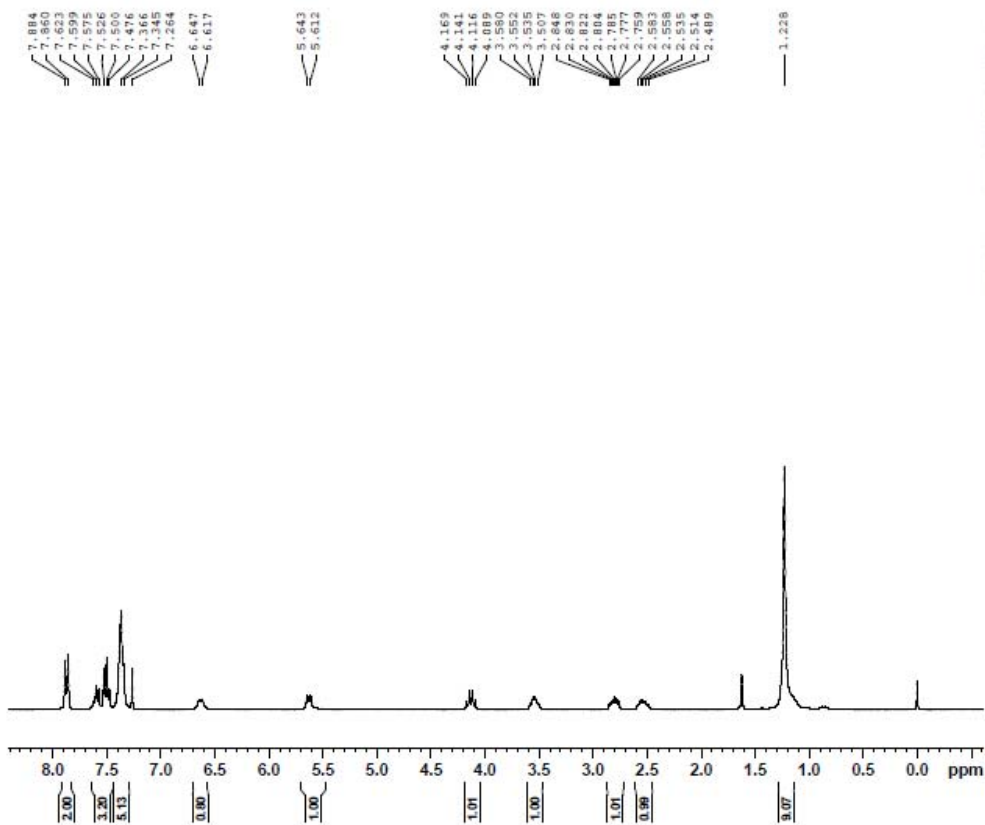

```
NAME          3j 12.26
EXPNO         1
PROCNO        1
Date_         20091226
Time          14.36
INSTRUM       spect
PROBHD        5 mm PABBO BH-
PULPROG       zgpg
SI            65536
SOLVENT       CDCl3
NS            8
DS            2
SWH           6162.119 Hz
F2REQ         0.094423 Hz
AQ            5.2953287 sec
RG            128
DM            80.000 usec
DE            6.50 usec
TE            321.0 K
SI            1.00000000 sec
TD            1
----- CHANNEL f1 -----
NUC1          1H
P1            11.80 usec
PL1           0.00 dB
PL12          11.55447794 dB
PL1W          300.1318524 MHz
RF1           300.1300000 MHz
MTW          RM
SFO           0
AQ            0.30 Hz
SI            0
DS            0
DSH           0
PC            1.00
```

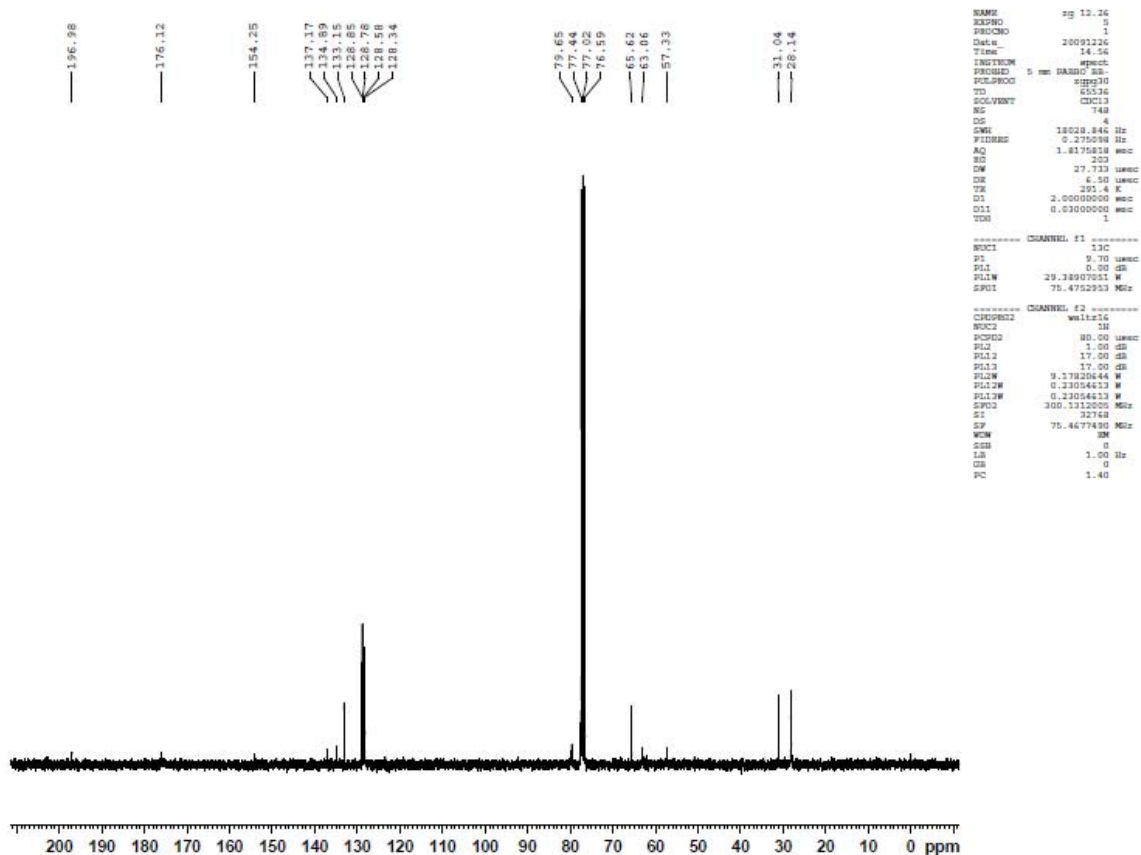

**7a: *tert*-butyl (S)-((R)-3-benzoyl-2-oxotetrahydro-2H-pyran-3-yl)(phenyl)methylcarbamate**

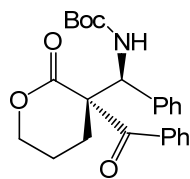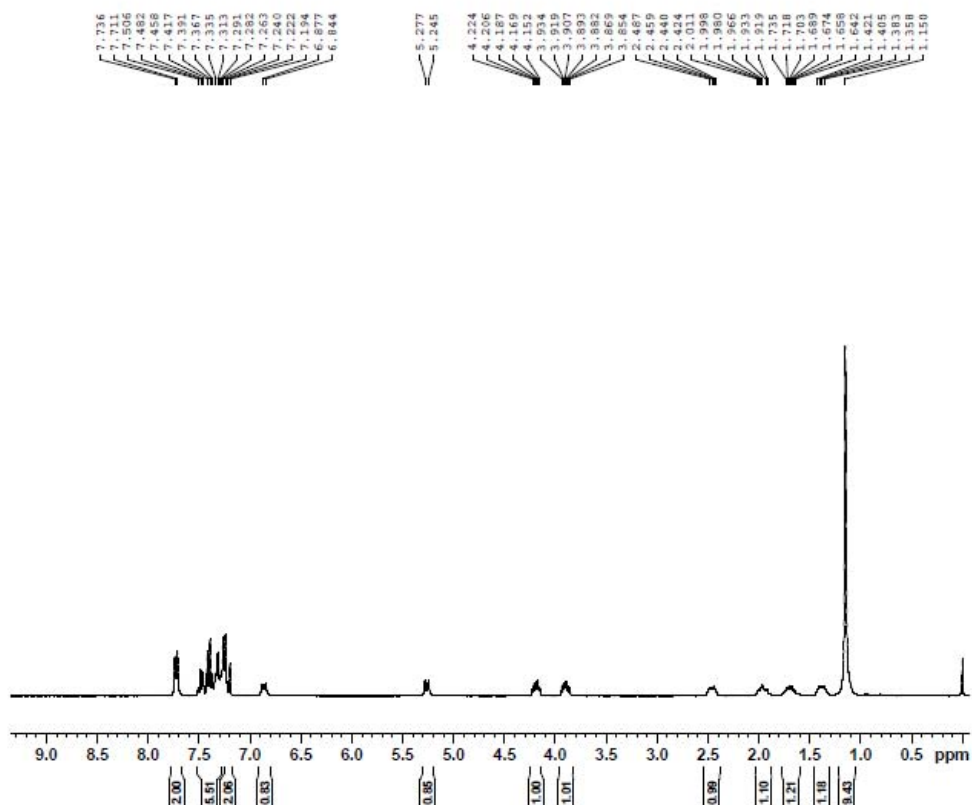

```
NAME      wbenff   sq 2009-11-18
EXPNO    1
PROCNO   1
Date_    20091217
Time     20.23
INSTRUM   spect
PROBHD    5 mm PABBO-SP
PULPROG   zg30
TD        65536
SOLVENT   CDCl3
NS        2
DS        2
SWH        6388.119 Hz
FIDRES    0.084423 Hz
AQ         1.2002587 sec
RG         512.8
IN       80.300 usec
DE         6.50 usec
TE        299.1 K
DT         1.00000000 sec
TOD       1
----- CHANNEL f1 -----
NUC1      13
P1         11.80 usec
PL1       0.00 dB
PL12      11.84467706 dB
SFO1      300.1362614 MHz
SI         32768
SF        300.1360210 MHz
WDW        EM
SSB        0
LB         0.30 Hz
GB         0
CB         1.00
```

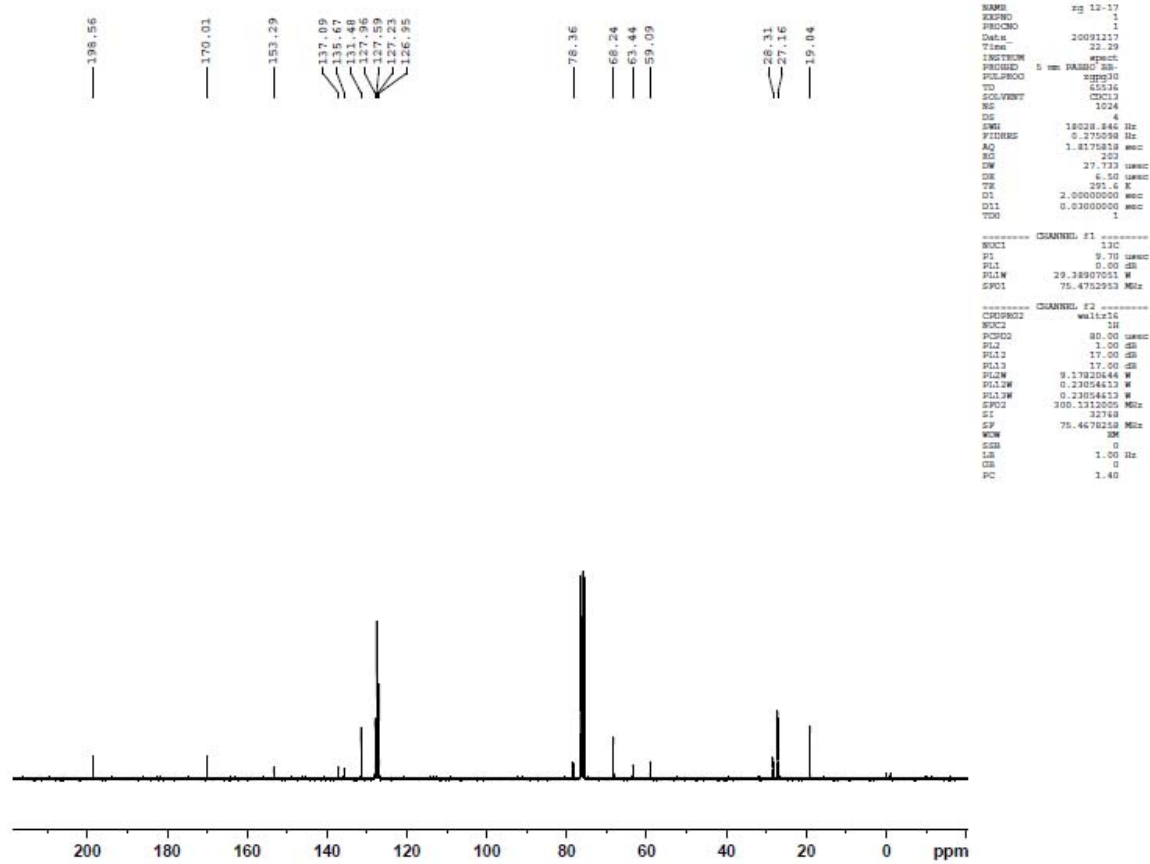

**8a: *tert*-butyl (*S*)-((*R*)-2-oxo-3-propionyltetrahydrofuran-3-yl)(phenyl)methylcarbamate**

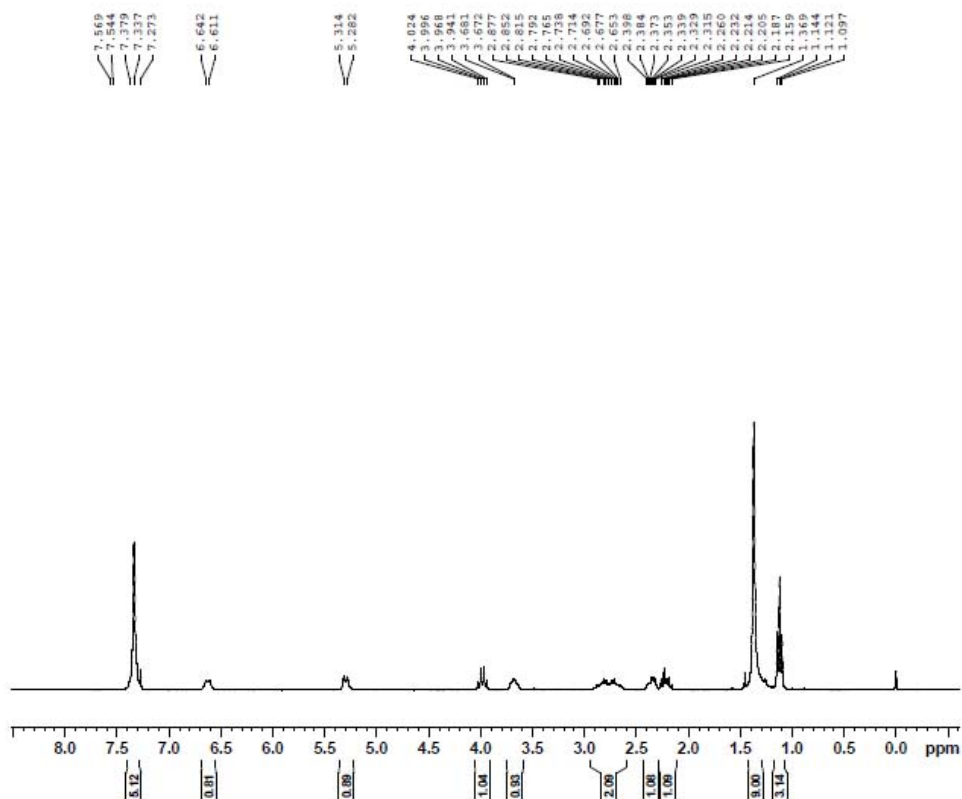

```
NAME      sq 091225
EXPNO    1
PROCNO   1
Date_    20091225
Time     16.30
INSTRUM  spect
PROBHD   5 mm PABBO BB-
PULPROG  zg30
TD        65536
SOLVENT  CDCl3
NS        8
DS        2
SWH       6182.119 Hz
FIDRES    0.094423 Hz
AQ        45.2
RG        5.2953287 sec
CW        80.800 usec
DE        4.50 usec
TE        290.2 K
D1        1.00000000 sec
TD0       1
----- CHANNEL f1 -----
NUC1      1H
P1        11.80 usec
PL1       0.00 dB
SFO1      11.55427796 MHz
SFO2      300.1328214 MHz
SI        32768
SF        300.1299979 MHz
WDW       EM
SSB       0
LB        0.30 Hz
GB        0
PC        1.00
```

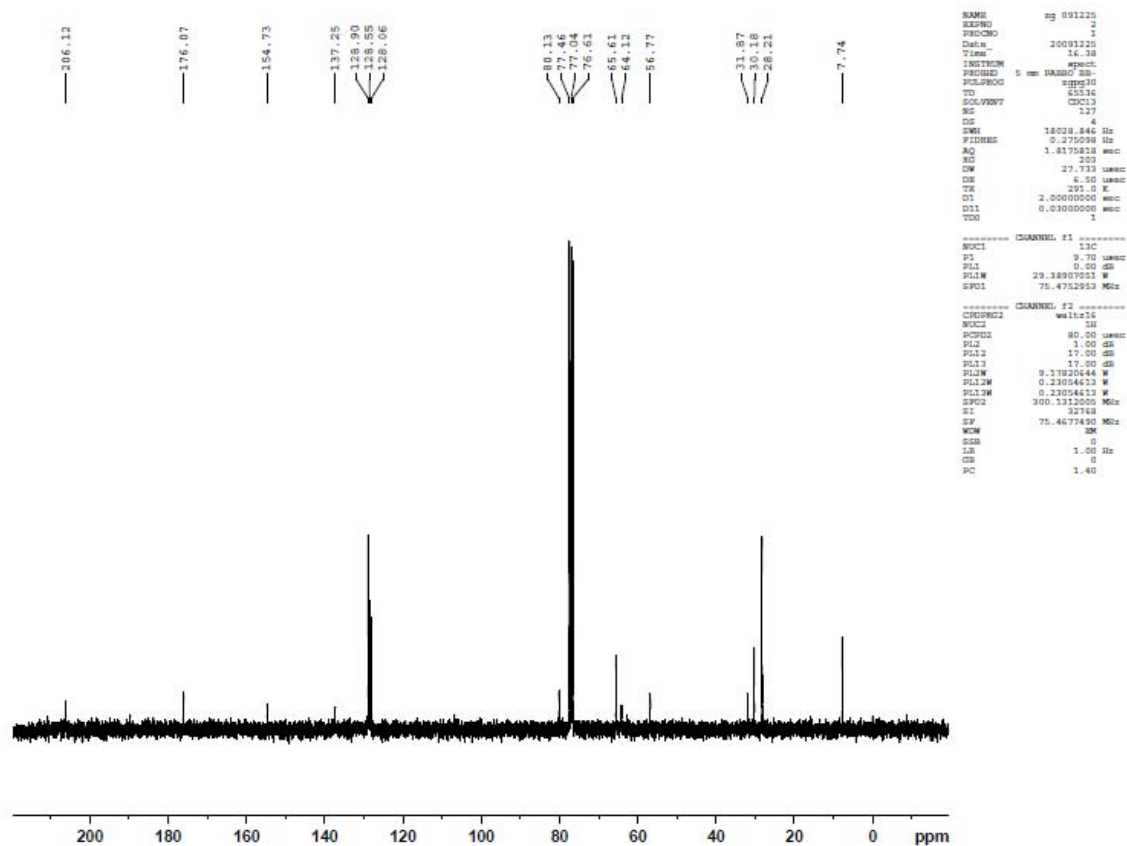

Supplement: c000621a.pdf [file c000621a.pdf]
